# Supplementary material for: Residency, movement patterns, behavior and demographics of reef manta rays in Komodo National Park
Source: PeerJ. 2022 May 16;10:e13302. doi: 10.7717/peerj.13302 (PMC9119296; doi:10.7717/peerj.13302)
Supplement: Supplemental Information 10 — The data details the date, location, and identification code for individual sightings used for the analyses. [file peerj-10-13302-s010.xlsx]

## Sheet: Sheet1
Date	Area	ID
2013-01-20	KM	INKNP0001A
2013-10-09	KM	INKNP0001A
2013-11-04	KM	INKNP0001A
2014-04-03	KM	INKNP0001A
2014-11-02	KM	INKNP0001A
2015-05-04	KM	INKNP0001A
2017-02-03	KM	INKNP0001A
2018-01-03	KM	INKNP0001A
2013-03-03	KM	INKNP0002A
2015-05-05	MA	INKNP0002A
2013-03-27	KM	INKNP0003A
2013-05-05	KM	INKNP0003A
2014-04-28	KM	INKNP0003A
2015-03-19	KM	INKNP0003A
2016-04-12	KM	INKNP0003A
2016-04-14	KM	INKNP0003A
2016-11-24	KM	INKNP0003A
2017-01-30	KM	INKNP0003A
2018-03-06	KM	INKNP0003A
2013-03-21	KM	INKNP0004A
2013-06-04	KM	INKNP0004A
2015-11-14	KM	INKNP0004A
2016-07-10	KM	INKNP0004A
2017-12-04	KM	INKNP0004A
2013-03-21	KM	INKNP0005A
2013-03-21	KM	INKNP0006A
2013-04-26	KM	INKNP0006A
2014-05-17	KM	INKNP0006A
2017-01-19	MW	INKNP0007A
2017-04-27	MW	INKNP0007A
2013-05-11	KM	INKNP0008A
2014-04-17	KM	INKNP0008A
2014-04-29	KM	INKNP0008A
2014-05-16	KM	INKNP0008A
2014-08-28	KM	INKNP0008A
2013-03-21	KM	INKNP0009A
2013-09-27	MA	INKNP0009A
2013-10-14	MA	INKNP0009A
2014-06-17	KM	INKNP0009A
2016-07-10	KM	INKNP0009A
2016-08-01	MA	INKNP0009A
2017-08-19	MA	INKNP0009A
2018-02-22	KM	INKNP0009A
2013-04-06	KM	INKNP0010A
2013-05-15	KM	INKNP0010A
2013-06-04	KM	INKNP0010A
2013-11-22	MW	INKNP0010A
2014-07-14	KM	INKNP0010A
2014-07-17	KM	INKNP0010A
2015-09-03	MW	INKNP0010A
2016-08-20	KM	INKNP0010A
2017-06-14	MW	INKNP0010A
2017-07-07	KM	INKNP0010A
2017-09-22	KM	INKNP0010A
2017-11-07	MW	INKNP0010A
2013-05-11	KM	INKNP0011A
2014-05-18	KM	INKNP0011A
2018-01-05	KM	INKNP0011A
2013-05-11	KM	INKNP0012A
2014-01-07	KM	INKNP0012A
2014-04-03	KM	INKNP0012A
2015-01-19	KM	INKNP0012A
2015-04-22	MW	INKNP0012A
2016-10-06	MW	INKNP0012A
2017-04-29	MW	INKNP0012A
2017-12-05	KM	INKNP0012A
2013-04-01	MA	INKNP0013A
2013-04-10	KM	INKNP0013A
2013-09-27	MA	INKNP0013A
2013-10-14	MA	INKNP0013A
2014-01-03	KM	INKNP0013A
2015-09-03	MW	INKNP0013A
2015-09-10	MA	INKNP0013A
2016-10-30	KM	INKNP0013A
2017-08-18	MA	INKNP0013A
2017-08-19	MA	INKNP0013A
2014-07-08	MA	INKNP0015A
2014-07-10	KM	INKNP0015A
2016-06-20	MA	INKNP0015A
2016-08-08	MA	INKNP0015A
2016-10-09	KM	INKNP0015A
2016-10-19	KM	INKNP0015A
2016-12-01	KM	INKNP0015A
2017-01-09	KM	INKNP0015A
2017-04-10	KM	INKNP0015A
2017-04-12	KM	INKNP0015A
2013-09-17	MA	INKNP0016A
2013-09-21	MA	INKNP0016A
2016-08-19	MA	INKNP0016A
2017-02-02	KM	INKNP0016A
2013-12-22	MW	INKNP0018A
2015-10-17	KM	INKNP0018A
2016-03-02	KM	INKNP0018A
2016-05-10	KM	INKNP0018A
2016-07-10	KM	INKNP0018A
2016-10-22	KM	INKNP0018A
2016-11-03	KM	INKNP0018A
2017-04-27	KM	INKNP0018A
2017-11-04	KM	INKNP0018A
2017-11-24	KM	INKNP0018A
2017-11-28	KM	INKNP0018A
2018-01-04	KM	INKNP0018A
2014-01-07	KM	INKNP0019A
2014-12-04	MW	INKNP0019A
2015-11-16	MW	INKNP0019A
2016-11-03	KM	INKNP0019A
2017-12-02	MW	INKNP0019A
2017-09-18	KM	INKNP0020A
2017-12-09	MW	INKNP0020A
2013-05-14	KM	INKNP0021A
2013-07-27	KM	INKNP0021A
2013-08-23	MW	INKNP0021A
2014-01-09	KM	INKNP0021A
2014-09-12	KM	INKNP0021A
2017-04-07	KM	INKNP0021A
2013-05-14	KM	INKNP0022A
2014-05-28	MA	INKNP0022A
2013-05-14	KM	INKNP0023A
2013-07-11	KM	INKNP0023A
2015-03-26	KM	INKNP0023A
2015-05-04	KM	INKNP0023A
2015-11-01	KM	INKNP0023A
2017-03-27	KM	INKNP0023A
2017-04-18	KM	INKNP0023A
2013-06-07	KM	INKNP0024A
2013-07-24	KM	INKNP0024A
2013-07-25	KM	INKNP0024A
2013-09-17	KM	INKNP0024A
2013-09-23	KM	INKNP0024A
2014-06-04	KM	INKNP0024A
2014-07-15	KM	INKNP0024A
2014-10-11	MW	INKNP0024A
2014-12-15	MW	INKNP0024A
2016-07-20	KM	INKNP0024A
2016-11-03	KM	INKNP0024A
2018-02-22	KM	INKNP0024A
2013-03-21	KM	INKNP0025A
2013-11-24	KM	INKNP0025A
2013-11-26	KM	INKNP0025A
2016-05-18	KM	INKNP0025A
2013-05-21	MW	INKNP0026A
2013-10-09	KM	INKNP0026A
2014-04-19	KM	INKNP0026A
2014-07-26	MW	INKNP0026A
2014-07-27	MW	INKNP0026A
2014-12-16	MW	INKNP0026A
2016-08-20	KM	INKNP0026A
2016-10-18	KM	INKNP0026A
2017-11-02	KM	INKNP0026A
2013-05-21	MW	INKNP0027A
2015-11-13	MW	INKNP0027A
2016-04-12	KM	INKNP0027A
2016-05-04	MW	INKNP0027A
2013-11-26	KM	INKNP0028A
2014-05-17	KM	INKNP0028A
2014-12-05	KM	INKNP0028A
2016-04-12	KM	INKNP0028A
2016-04-25	KM	INKNP0028A
2017-04-19	KM	INKNP0028A
2017-05-27	KM	INKNP0028A
2013-05-21	MW	INKNP0029A
2013-05-24	MW	INKNP0030A
2014-05-03	MW	INKNP0030A
2014-08-27	MW	INKNP0030A
2015-08-13	KM	INKNP0030A
2017-09-22	KM	INKNP0030A
2018-03-26	MW	INKNP0030A
2013-05-24	MW	INKNP0031A
2014-01-22	KM	INKNP0031A
2015-11-20	MW	INKNP0031A
2015-11-25	KM	INKNP0031A
2016-07-28	KM	INKNP0031A
2013-05-24	MW	INKNP0032A
2014-05-01	MW	INKNP0032A
2013-05-28	MW	INKNP0033A
2013-05-28	MW	INKNP0034A
2014-05-28	MA	INKNP0034A
2016-08-19	MA	INKNP0034A
2016-12-01	KM	INKNP0034A
2017-11-17	MA	INKNP0034A
2018-02-28	MW	INKNP0034A
2013-05-29	KM	INKNP0035A
2015-05-02	KM	INKNP0035A
2015-05-04	KM	INKNP0035A
2015-05-26	MA	INKNP0035A
2016-07-10	KM	INKNP0035A
2016-07-13	KM	INKNP0035A
2016-10-22	KM	INKNP0035A
2017-03-27	KM	INKNP0035A
2017-10-12	KM	INKNP0035A
2017-11-02	KM	INKNP0035A
2017-02-02	MW	INKNP0036A
2013-11-19	MA	INKNP0038A
2014-04-15	MA	INKNP0038A
2015-04-13	MA	INKNP0038A
2015-05-14	MA	INKNP0038A
2016-08-22	MA	INKNP0038A
2016-10-18	KM	INKNP0038A
2013-03-21	KM	INKNP0039A
2014-04-15	MA	INKNP0039A
2014-05-05	KM	INKNP0039A
2014-07-13	KM	INKNP0039A
2014-08-02	MW	INKNP0039A
2015-04-22	MW	INKNP0039A
2013-03-21	KM	INKNP0040A
2014-12-05	KM	INKNP0040A
2017-11-06	KM	INKNP0040A
2013-03-21	KM	INKNP0041A
2013-08-07	KM	INKNP0041A
2013-12-12	KM	INKNP0041A
2014-03-16	KM	INKNP0041A
2014-05-22	KM	INKNP0041A
2014-08-28	KM	INKNP0041A
2014-12-22	KM	INKNP0041A
2015-03-26	KM	INKNP0041A
2015-04-13	MA	INKNP0041A
2015-05-26	MA	INKNP0041A
2016-09-14	MA	INKNP0041A
2017-10-26	KM	INKNP0041A
2013-03-22	KM	INKNP0042A
2013-03-27	KM	INKNP0043A
2014-06-04	KM	INKNP0043A
2013-03-24	KM	INKNP0044A
2017-04-12	MW	INKNP0044A
2017-11-18	MW	INKNP0044A
2017-12-08	KM	INKNP0044A
2018-01-05	KM	INKNP0044A
2013-03-27	KM	INKNP0045A
2013-03-30	KM	INKNP0046A
2013-03-30	KM	INKNP0047A
2013-12-01	KM	INKNP0047A
2017-03-29	MW	INKNP0047A
2013-03-30	KM	INKNP0048A
2013-03-30	KM	INKNP0049A
2014-04-19	KM	INKNP0049A
2015-04-22	MW	INKNP0049A
2016-07-10	KM	INKNP0049A
2016-07-18	KM	INKNP0049A
2017-01-31	KM	INKNP0049A
2013-03-30	KM	INKNP0050A
2014-08-11	KM	INKNP0050A
2014-12-16	MW	INKNP0050A
2016-07-10	KM	INKNP0050A
2017-07-24	KM	INKNP0050A
2013-03-21	KM	INKNP0051A
2014-03-12	KM	INKNP0051A
2014-05-23	MA	INKNP0051A
2013-03-30	KM	INKNP0052A
2015-03-07	MW	INKNP0052A
2015-09-10	KM	INKNP0052A
2016-07-10	KM	INKNP0052A
2013-03-30	KM	INKNP0053A
2014-05-18	KM	INKNP0053A
2014-06-04	KM	INKNP0053A
2015-04-22	MW	INKNP0053A
2017-06-17	MW	INKNP0053A
2013-04-23	KM	INKNP0054A
2016-07-08	MA	INKNP0054A
2016-10-28	MW	INKNP0054A
2017-03-29	MW	INKNP0054A
2017-11-21	KM	INKNP0054A
2013-03-30	KM	INKNP0055A
2014-06-26	KM	INKNP0055A
2015-03-11	KM	INKNP0055A
2017-04-29	KM	INKNP0055A
2017-05-16	MW	INKNP0055A
2013-03-04	KM	INKNP0056A
2013-07-25	KM	INKNP0056A
2013-09-17	MA	INKNP0056A
2013-09-18	MA	INKNP0056A
2013-11-14	MA	INKNP0056A
2014-05-21	MA	INKNP0056A
2014-07-08	MA	INKNP0056A
2013-04-06	KM	INKNP0058A
2014-04-29	KM	INKNP0058A
2016-10-30	KM	INKNP0058A
2013-04-06	KM	INKNP0059A
2014-01-09	KM	INKNP0059A
2013-05-03	KM	INKNP0061A
2014-01-09	KM	INKNP0061A
2014-05-06	KM	INKNP0061A
2015-03-04	KM	INKNP0061A
2015-05-04	KM	INKNP0061A
2017-10-26	KM	INKNP0061A
2013-05-03	KM	INKNP0062A
2013-10-14	MA	INKNP0062A
2014-07-08	MA	INKNP0062A
2016-08-19	MA	INKNP0062A
2017-05-01	MW	INKNP0062A
2013-05-05	KM	INKNP0063A
2013-09-17	MA	INKNP0063A
2014-04-15	MA	INKNP0063A
2014-11-05	MA	INKNP0063A
2015-05-26	MA	INKNP0063A
2015-11-01	KM	INKNP0063A
2016-02-19	MW	INKNP0063A
2016-07-06	MW	INKNP0063A
2016-08-19	MA	INKNP0063A
2016-09-14	MA	INKNP0063A
2016-10-19	MA	INKNP0063A
2017-01-07	MW	INKNP0063A
2017-09-25	MA	INKNP0063A
2018-01-03	KM	INKNP0063A
2013-01-26	KM	INKNP0064A
2013-04-29	KM	INKNP0064A
2015-04-22	KM	INKNP0064A
2013-04-26	KM	INKNP0065A
2013-11-30	MW	INKNP0065A
2013-12-04	KM	INKNP0065A
2014-04-19	KM	INKNP0065A
2014-04-20	KM	INKNP0065A
2015-03-11	KM	INKNP0065A
2015-04-18	KM	INKNP0065A
2018-03-24	MW	INKNP0065A
2014-11-25	MA	INKNP0066A
2015-11-03	KM	INKNP0066A
2013-06-09	KM	INKNP0067A
2016-07-13	KM	INKNP0067A
2016-08-24	MW	INKNP0067A
2016-11-08	MW	INKNP0067A
2013-11-19	MA	INKNP0068A
2013-12-12	KM	INKNP0068A
2015-03-24	KM	INKNP0068A
2016-07-13	KM	INKNP0068A
2016-09-14	MA	INKNP0068A
2016-10-04	MA	INKNP0068A
2017-05-14	MA	INKNP0068A
2017-05-27	MA	INKNP0068A
2013-05-08	KM	INKNP0069A
2013-11-30	MW	INKNP0069A
2013-04-26	KM	INKNP0070A
2014-08-11	KM	INKNP0070A
2014-12-11	MW	INKNP0070A
2015-01-07	MW	INKNP0070A
2018-03-02	MW	INKNP0070A
2013-06-04	KM	INKNP0071A
2013-07-12	MW	INKNP0071A
2014-01-09	KM	INKNP0071A
2016-07-13	KM	INKNP0071A
2013-06-04	KM	INKNP0072A
2013-11-19	MA	INKNP0072A
2014-05-06	KM	INKNP0072A
2015-03-26	KM	INKNP0072A
2016-07-10	KM	INKNP0072A
2016-11-28	KM	INKNP0072A
2017-02-03	KM	INKNP0072A
2017-02-16	KM	INKNP0072A
2017-06-27	MW	INKNP0072A
2017-10-26	KM	INKNP0072A
2018-01-05	KM	INKNP0072A
2013-05-24	MW	INKNP0074A
2014-01-09	KM	INKNP0074A
2013-05-24	MW	INKNP0075A
2015-01-07	MW	INKNP0075A
2015-04-21	MW	INKNP0075A
2013-06-01	KM	INKNP0076A
2013-09-18	MA	INKNP0076A
2014-03-19	MA	INKNP0076A
2014-05-06	KM	INKNP0076A
2014-09-23	MA	INKNP0076A
2015-05-14	MA	INKNP0076A
2016-07-23	MA	INKNP0076A
2016-10-04	MA	INKNP0076A
2017-04-12	KM	INKNP0076A
2017-08-18	MA	INKNP0076A
2017-08-19	MA	INKNP0076A
2013-06-01	KM	INKNP0077A
2013-09-17	MA	INKNP0077A
2015-05-14	MA	INKNP0077A
2016-12-06	MW	INKNP0077A
2017-03-02	MW	INKNP0077A
2017-06-01	MW	INKNP0077A
2017-08-18	MA	INKNP0077A
2017-08-19	MA	INKNP0077A
2013-06-01	KM	INKNP0078A
2014-06-03	MA	INKNP0078A
2015-01-26	KM	INKNP0078A
2015-04-11	MA	INKNP0078A
2015-11-16	KM	INKNP0078A
2015-11-17	KM	INKNP0078A
2017-05-27	MA	INKNP0078A
2013-06-04	KM	INKNP0079A
2013-10-14	MA	INKNP0079A
2014-01-09	KM	INKNP0079A
2015-03-04	KM	INKNP0079A
2016-07-10	KM	INKNP0079A
2016-10-09	KM	INKNP0079A
2016-10-19	MW	INKNP0079A
2017-12-06	MW	INKNP0079A
2018-01-03	KM	INKNP0079A
2013-05-22	KM	INKNP0080A
2013-06-04	KM	INKNP0080A
2014-09-03	MA	INKNP0080A
2014-10-07	MA	INKNP0080A
2014-11-25	MA	INKNP0080A
2016-10-26	MA	INKNP0080A
2013-06-07	KM	INKNP0081A
2013-09-17	MA	INKNP0081A
2014-01-08	KM	INKNP0081A
2014-01-09	KM	INKNP0081A
2014-02-08	KM	INKNP0081A
2014-05-06	KM	INKNP0081A
2014-05-15	KM	INKNP0081A
2014-06-14	KM	INKNP0081A
2014-11-05	MA	INKNP0081A
2015-05-04	KM	INKNP0081A
2016-10-04	MA	INKNP0081A
2016-11-03	KM	INKNP0081A
2017-08-25	MA	INKNP0081A
2013-04-25	KM	INKNP0082A
2013-06-07	KM	INKNP0082A
2013-12-02	KM	INKNP0082A
2014-01-05	KM	INKNP0082A
2014-01-08	KM	INKNP0082A
2014-05-15	KM	INKNP0082A
2014-05-17	KM	INKNP0082A
2014-06-04	KM	INKNP0082A
2015-04-21	MW	INKNP0082A
2015-04-22	MW	INKNP0082A
2015-07-28	KM	INKNP0082A
2016-04-14	KM	INKNP0082A
2017-03-02	MW	INKNP0082A
2013-01-09	KM	INKNP0083A
2013-06-07	KM	INKNP0083A
2013-09-18	MA	INKNP0083A
2013-10-10	KM	INKNP0083A
2014-01-08	KM	INKNP0083A
2014-01-09	KM	INKNP0083A
2016-07-13	KM	INKNP0083A
2017-06-01	MW	INKNP0083A
2017-07-11	MW	INKNP0083A
2013-06-09	KM	INKNP0084A
2013-07-24	KM	INKNP0084A
2014-03-11	MA	INKNP0084A
2014-05-02	KM	INKNP0084A
2014-05-16	KM	INKNP0084A
2013-06-09	KM	INKNP0085A
2013-11-26	KM	INKNP0085A
2015-04-22	MW	INKNP0085A
2016-10-22	KM	INKNP0085A
2016-11-15	KM	INKNP0085A
2017-04-27	MW	INKNP0085A
2017-05-27	MA	INKNP0085A
2017-11-25	KM	INKNP0085A
2013-06-09	KM	INKNP0086A
2014-05-05	MW	INKNP0086A
2016-07-10	KM	INKNP0086A
2017-01-21	MW	INKNP0086A
2017-02-25	MW	INKNP0086A
2013-06-09	KM	INKNP0087A
2014-11-12	MA	INKNP0087A
2015-04-12	KM	INKNP0087A
2016-04-19	KM	INKNP0087A
2016-07-13	KM	INKNP0087A
2013-06-09	KM	INKNP0088A
2014-01-02	KM	INKNP0088A
2014-05-12	MW	INKNP0088A
2013-06-09	KM	INKNP0089A
2014-10-23	KM	INKNP0089A
2013-05-12	KM	INKNP0090A
2013-06-10	MA	INKNP0090A
2013-05-12	KM	INKNP0091A
2014-05-20	MA	INKNP0091A
2014-09-23	MA	INKNP0091A
2013-05-12	KM	INKNP0092A
2013-05-12	KM	INKNP0093A
2013-05-15	KM	INKNP0093A
2016-08-20	KM	INKNP0093A
2016-09-15	KM	INKNP0093A
2016-09-29	KM	INKNP0093A
2016-10-09	KM	INKNP0093A
2013-04-01	MA	INKNP0094A
2013-05-15	KM	INKNP0094A
2013-11-19	MA	INKNP0094A
2014-05-05	KM	INKNP0094A
2014-05-15	KM	INKNP0094A
2014-05-17	KM	INKNP0094A
2014-06-17	KM	INKNP0094A
2013-05-15	KM	INKNP0095A
2016-07-10	KM	INKNP0095A
2016-08-09	KM	INKNP0095A
2017-11-08	KM	INKNP0095A
2013-05-15	KM	INKNP0096A
2013-09-18	MA	INKNP0097A
2013-09-27	MA	INKNP0097A
2013-10-14	MA	INKNP0097A
2014-09-03	MA	INKNP0097A
2017-08-18	MA	INKNP0097A
2013-10-10	KM	INKNP0098A
2013-07-12	MW	INKNP0099A
2013-12-29	MW	INKNP0099A
2014-04-17	KM	INKNP0099A
2017-02-03	KM	INKNP0099A
2018-02-28	MW	INKNP0099A
2013-07-12	MW	INKNP0100A
2013-07-14	MW	INKNP0100A
2014-04-03	KM	INKNP0100A
2015-04-21	MW	INKNP0100A
2016-07-18	KM	INKNP0100A
2017-11-19	MW	INKNP0100A
2013-05-15	KM	INKNP0101A
2014-08-11	KM	INKNP0101A
2014-12-05	KM	INKNP0101A
2016-05-10	KM	INKNP0101A
2013-11-19	MA	INKNP0102A
2013-12-09	KM	INKNP0102A
2014-10-06	MA	INKNP0102A
2014-10-07	MA	INKNP0102A
2014-12-05	KM	INKNP0102A
2015-05-26	MA	INKNP0102A
2016-03-11	MW	INKNP0102A
2016-07-10	KM	INKNP0102A
2017-08-18	MA	INKNP0102A
2017-08-25	MA	INKNP0102A
2014-05-15	KM	INKNP0103A
2015-11-16	KM	INKNP0103A
2016-03-07	KM	INKNP0103A
2017-03-13	KM	INKNP0103A
2017-08-23	KM	INKNP0103A
2013-01-03	KM	INKNP0104A
2013-10-10	KM	INKNP0104A
2013-11-30	MW	INKNP0104A
2014-03-11	MA	INKNP0104A
2014-08-13	MW	INKNP0104A
2014-11-12	MA	INKNP0104A
2016-07-06	MW	INKNP0104A
2016-08-19	MA	INKNP0104A
2016-11-24	KM	INKNP0104A
2017-03-29	MW	INKNP0104A
2017-11-18	MW	INKNP0104A
2017-12-30	KM	INKNP0104A
2018-02-03	MW	INKNP0104A
2013-10-07	KM	INKNP0105A
2016-07-13	KM	INKNP0105A
2017-05-25	MW	INKNP0105A
2017-11-02	KM	INKNP0105A
2017-04-26	MW	INKNP0106A
2017-11-05	MW	INKNP0106A
2018-02-02	MW	INKNP0106A
2014-01-10	KM	INKNP0107A
2017-04-13	KM	INKNP0107A
2017-04-18	KM	INKNP0107A
2017-08-22	KM	INKNP0107A
2017-08-23	KM	INKNP0107A
2013-10-10	MW	INKNP0108A
2018-03-08	KM	INKNP0108A
2018-03-21	MW	INKNP0108A
2013-08-12	MW	INKNP0109A
2013-09-18	MA	INKNP0109A
2013-09-21	MA	INKNP0109A
2013-11-14	MA	INKNP0109A
2014-03-11	MA	INKNP0109A
2014-07-08	MA	INKNP0109A
2014-08-05	MA	INKNP0109A
2014-10-07	MA	INKNP0109A
2014-10-11	MA	INKNP0109A
2014-11-20	MA	INKNP0109A
2016-07-23	MA	INKNP0109A
2016-08-22	MA	INKNP0109A
2016-10-04	MA	INKNP0109A
2017-05-27	KM	INKNP0109A
2013-06-10	MA	INKNP0110A
2013-10-14	MA	INKNP0110A
2014-04-15	MA	INKNP0110A
2014-05-21	MA	INKNP0110A
2014-09-12	MA	INKNP0110A
2014-10-06	MA	INKNP0110A
2015-04-10	MA	INKNP0110A
2015-04-13	MA	INKNP0110A
2015-05-14	MA	INKNP0110A
2015-09-10	MA	INKNP0110A
2016-07-23	MA	INKNP0110A
2016-08-18	MA	INKNP0110A
2016-08-19	MA	INKNP0110A
2016-09-14	MA	INKNP0110A
2016-10-04	MA	INKNP0110A
2016-10-11	MA	INKNP0110A
2018-03-31	KM	INKNP0110A
2013-09-21	MA	INKNP0111A
2013-10-14	MA	INKNP0111A
2013-11-19	MA	INKNP0111A
2014-02-05	MA	INKNP0111A
2014-05-28	MA	INKNP0111A
2014-06-04	MA	INKNP0111A
2014-08-05	MA	INKNP0111A
2014-09-10	MA	INKNP0111A
2014-09-18	MA	INKNP0111A
2014-10-07	MA	INKNP0111A
2014-10-29	MA	INKNP0111A
2014-11-11	MA	INKNP0111A
2014-11-20	MA	INKNP0111A
2016-08-16	KM	INKNP0111A
2017-06-13	MW	INKNP0111A
2017-12-05	MW	INKNP0111A
2013-09-21	MA	INKNP0112A
2013-10-14	MA	INKNP0112A
2014-10-26	MA	INKNP0112A
2013-09-17	MA	INKNP0113A
2013-09-18	MA	INKNP0113A
2013-10-14	MA	INKNP0113A
2013-11-19	MA	INKNP0113A
2014-11-05	MA	INKNP0113A
2016-10-11	MA	INKNP0113A
2013-10-14	MA	INKNP0114A
2013-09-17	MA	INKNP0115A
2013-10-14	MA	INKNP0115A
2014-03-11	MA	INKNP0115A
2014-10-06	MA	INKNP0115A
2015-05-14	MA	INKNP0115A
2015-09-10	MA	INKNP0115A
2016-04-25	KM	INKNP0115A
2015-05-20	MW	INKNP0116A
2017-03-01	MW	INKNP0116A
2017-11-02	KM	INKNP0116A
2013-06-26	KM	INKNP0117A
2013-10-07	KM	INKNP0117A
2013-12-10	KM	INKNP0117A
2013-10-14	MA	INKNP0118A
2014-11-25	MA	INKNP0118A
2013-09-17	MA	INKNP0119A
2013-09-18	MA	INKNP0119A
2013-09-21	MA	INKNP0119A
2013-12-14	MA	INKNP0119A
2015-04-11	MA	INKNP0119A
2015-05-05	MA	INKNP0119A
2015-05-14	MA	INKNP0119A
2015-05-26	MA	INKNP0119A
2016-08-01	MA	INKNP0119A
2016-08-19	MA	INKNP0119A
2013-08-08	KM	INKNP0120A
2013-09-18	MA	INKNP0120A
2013-09-21	MA	INKNP0120A
2016-05-18	KM	INKNP0120A
2018-01-09	KM	INKNP0120A
2013-09-23	KM	INKNP0121A
2014-04-03	KM	INKNP0121A
2014-08-12	KM	INKNP0121A
2015-03-04	KM	INKNP0121A
2015-03-06	KM	INKNP0121A
2013-07-25	KM	INKNP0122A
2013-09-23	KM	INKNP0122A
2013-09-24	KM	INKNP0122A
2013-10-05	KM	INKNP0122A
2013-10-06	KM	INKNP0122A
2015-02-28	KM	INKNP0122A
2015-03-26	KM	INKNP0122A
2015-04-10	KM	INKNP0122A
2013-09-26	KM	INKNP0123A
2013-12-04	KM	INKNP0123A
2013-12-12	KM	INKNP0123A
2014-05-28	MA	INKNP0123A
2016-07-11	MA	INKNP0123A
2016-07-13	KM	INKNP0123A
2016-07-23	MA	INKNP0123A
2016-10-19	KM	INKNP0123A
2017-03-29	MW	INKNP0123A
2017-08-19	MA	INKNP0123A
2017-09-25	MA	INKNP0123A
2017-11-24	KM	INKNP0123A
2013-06-26	KM	INKNP0124A
2013-10-01	KM	INKNP0124A
2014-03-13	KM	INKNP0124A
2014-05-15	KM	INKNP0124A
2015-04-12	KM	INKNP0124A
2015-05-03	KM	INKNP0124A
2016-07-10	KM	INKNP0124A
2017-04-18	KM	INKNP0124A
2013-10-05	KM	INKNP0125A
2014-05-01	MW	INKNP0125A
2014-08-13	MW	INKNP0125A
2016-02-24	MW	INKNP0125A
2016-09-05	MW	INKNP0125A
2016-12-01	KM	INKNP0125A
2017-02-01	MW	INKNP0125A
2013-10-07	KM	INKNP0126A
2013-11-19	MA	INKNP0126A
2013-10-07	KM	INKNP0127A
2015-04-21	MW	INKNP0127A
2015-05-20	MW	INKNP0127A
2015-11-25	KM	INKNP0127A
2017-04-11	KM	INKNP0127A
2017-08-22	MW	INKNP0127A
2013-10-05	KM	INKNP0128A
2013-10-09	KM	INKNP0128A
2014-12-04	MW	INKNP0128A
2013-10-10	KM	INKNP0129A
2013-10-10	MW	INKNP0129A
2014-04-28	KM	INKNP0129A
2016-07-10	KM	INKNP0129A
2016-08-19	MA	INKNP0129A
2016-10-08	MW	INKNP0129A
2016-10-30	KM	INKNP0129A
2014-01-08	KM	INKNP0130A
2014-07-17	KM	INKNP0130A
2017-02-16	KM	INKNP0130A
2017-11-07	KM	INKNP0130A
2013-10-14	MA	INKNP0131A
2017-04-27	MW	INKNP0132A
2013-09-23	KM	INKNP0133A
2013-09-27	KM	INKNP0133A
2014-01-07	KM	INKNP0133A
2014-01-10	KM	INKNP0133A
2014-05-17	KM	INKNP0133A
2014-05-21	MA	INKNP0133A
2014-07-29	MW	INKNP0133A
2014-08-12	KM	INKNP0133A
2015-03-26	KM	INKNP0133A
2015-12-29	KM	INKNP0133A
2017-04-18	KM	INKNP0133A
2017-11-02	KM	INKNP0133A
2017-11-20	MW	INKNP0133A
2017-11-24	KM	INKNP0133A
2013-10-09	KM	INKNP0134A
2014-04-29	MW	INKNP0134A
2017-04-18	KM	INKNP0134A
2017-12-09	KM	INKNP0134A
2013-10-09	KM	INKNP0135A
2014-08-28	KM	INKNP0135A
2015-03-26	KM	INKNP0135A
2016-05-10	KM	INKNP0135A
2016-07-12	KM	INKNP0135A
2016-09-14	MA	INKNP0135A
2016-10-04	MA	INKNP0135A
2016-12-02	KM	INKNP0135A
2017-08-26	MW	INKNP0135A
2014-07-27	KM	INKNP0136A
2015-05-12	KM	INKNP0136A
2016-09-15	KM	INKNP0136A
2017-03-06	MW	INKNP0136A
2017-04-10	KM	INKNP0136A
2017-04-18	KM	INKNP0136A
2017-10-31	KM	INKNP0136A
2013-10-10	KM	INKNP0137A
2013-12-12	KM	INKNP0137A
2013-12-31	KM	INKNP0137A
2014-01-09	KM	INKNP0137A
2014-04-29	KM	INKNP0137A
2014-08-12	KM	INKNP0137A
2014-08-28	KM	INKNP0137A
2015-11-14	MW	INKNP0137A
2016-07-10	KM	INKNP0137A
2016-11-03	KM	INKNP0137A
2017-03-27	KM	INKNP0137A
2017-04-26	MW	INKNP0137A
2013-10-10	MW	INKNP0138A
2013-10-10	MW	INKNP0138A
2013-12-19	MW	INKNP0138A
2014-08-13	MW	INKNP0138A
2016-07-10	KM	INKNP0138A
2017-02-01	MW	INKNP0138A
2013-09-21	MA	INKNP0139A
2013-10-14	MA	INKNP0139A
2014-10-31	KM	INKNP0139A
2013-08-14	KM	INKNP0140A
2013-10-14	MA	INKNP0140A
2014-07-13	MA	INKNP0140A
2014-10-06	MA	INKNP0140A
2014-11-25	MA	INKNP0140A
2015-05-14	MA	INKNP0140A
2015-09-22	MA	INKNP0140A
2016-07-11	MA	INKNP0140A
2016-10-04	MA	INKNP0140A
2016-10-19	MA	INKNP0140A
2013-10-14	MA	INKNP0141A
2014-05-05	KM	INKNP0141A
2014-11-05	MA	INKNP0141A
2015-11-03	KM	INKNP0141A
2016-06-28	KM	INKNP0141A
2016-09-14	MA	INKNP0141A
2013-09-18	MA	INKNP0142A
2013-09-21	MA	INKNP0142A
2014-02-08	KM	INKNP0142A
2014-03-14	KM	INKNP0142A
2014-05-23	MA	INKNP0142A
2014-05-28	MA	INKNP0142A
2014-06-03	MA	INKNP0142A
2013-10-14	MA	INKNP0145A
2013-09-18	MA	INKNP0146A
2013-10-14	MA	INKNP0146A
2014-09-03	MA	INKNP0146A
2014-10-06	MA	INKNP0146A
2014-10-29	MA	INKNP0146A
2014-11-12	MA	INKNP0146A
2014-11-20	MA	INKNP0146A
2014-11-25	MA	INKNP0146A
2015-09-22	MA	INKNP0146A
2016-06-20	MA	INKNP0146A
2016-07-23	MA	INKNP0146A
2016-08-08	MA	INKNP0146A
2017-04-11	KM	INKNP0146A
2018-03-31	KM	INKNP0146A
2013-10-14	MA	INKNP0147A
2013-12-29	MW	INKNP0147A
2014-06-22	MA	INKNP0147A
2015-01-04	MW	INKNP0147A
2017-01-23	KM	INKNP0147A
2013-09-17	MA	INKNP0148A
2013-11-14	MA	INKNP0148A
2014-01-08	KM	INKNP0148A
2014-01-09	KM	INKNP0148A
2014-03-11	MA	INKNP0148A
2014-05-20	MA	INKNP0148A
2014-05-21	MA	INKNP0148A
2014-08-05	MA	INKNP0148A
2014-08-12	KM	INKNP0148A
2015-04-10	MA	INKNP0148A
2015-04-11	MA	INKNP0148A
2016-07-23	MA	INKNP0148A
2016-08-22	MA	INKNP0148A
2016-08-28	MA	INKNP0148A
2013-04-01	MA	INKNP0149A
2014-01-09	KM	INKNP0149A
2015-03-26	KM	INKNP0149A
2013-04-01	MA	INKNP0150A
2013-11-24	KM	INKNP0150A
2014-03-11	MA	INKNP0150A
2014-06-14	KM	INKNP0150A
2014-06-18	KM	INKNP0150A
2014-09-03	MA	INKNP0150A
2014-10-29	KM	INKNP0150A
2016-07-10	KM	INKNP0150A
2016-07-13	KM	INKNP0150A
2016-07-23	MA	INKNP0150A
2016-08-28	MA	INKNP0150A
2016-10-26	MA	INKNP0150A
2016-12-02	KM	INKNP0150A
2017-03-01	MW	INKNP0150A
2017-04-07	KM	INKNP0150A
2017-05-14	MA	INKNP0150A
2017-08-18	MA	INKNP0150A
2017-09-25	MA	INKNP0150A
2017-10-10	KM	INKNP0150A
2017-10-11	MW	INKNP0150A
2018-02-01	MW	INKNP0150A
2013-04-01	MA	INKNP0151A
2013-11-19	MA	INKNP0151A
2013-11-30	MW	INKNP0151A
2014-01-08	KM	INKNP0151A
2016-06-20	MA	INKNP0151A
2016-11-01	MW	INKNP0151A
2013-04-01	MA	INKNP0152A
2014-10-26	KM	INKNP0152A
2014-11-05	MA	INKNP0152A
2015-01-04	MW	INKNP0152A
2015-03-24	MW	INKNP0152A
2015-04-21	MW	INKNP0152A
2013-04-01	MA	INKNP0153A
2013-09-17	MA	INKNP0153A
2013-09-18	MA	INKNP0153A
2013-10-01	MA	INKNP0153A
2014-05-20	MA	INKNP0153A
2014-05-21	MA	INKNP0153A
2016-08-01	MA	INKNP0153A
2016-08-22	MA	INKNP0153A
2016-12-17	KM	INKNP0153A
2017-08-18	MA	INKNP0153A
2017-09-25	MA	INKNP0153A
2017-12-02	MW	INKNP0153A
2013-04-01	MA	INKNP0154A
2013-06-26	KM	INKNP0154A
2013-09-17	MA	INKNP0154A
2014-01-15	KM	INKNP0154A
2014-01-19	MW	INKNP0154A
2014-05-05	MW	INKNP0154A
2014-05-25	MA	INKNP0154A
2014-07-08	MA	INKNP0154A
2015-04-13	MA	INKNP0154A
2015-05-14	MA	INKNP0154A
2015-07-20	MW	INKNP0154A
2016-02-19	MW	INKNP0154A
2016-03-11	MW	INKNP0154A
2017-03-29	MW	INKNP0154A
2017-06-10	MW	INKNP0154A
2017-06-19	KM	INKNP0154A
2017-09-29	MA	INKNP0154A
2017-12-09	MW	INKNP0154A
2013-04-01	MA	INKNP0155A
2013-11-19	MA	INKNP0155A
2014-11-11	MA	INKNP0155A
2016-06-16	KM	INKNP0155A
2016-07-23	MA	INKNP0155A
2016-08-22	MA	INKNP0155A
2016-10-11	MA	INKNP0155A
2013-04-01	MA	INKNP0156A
2014-06-03	MA	INKNP0156A
2015-04-10	MA	INKNP0156A
2015-04-11	MA	INKNP0156A
2015-04-13	MA	INKNP0156A
2015-05-14	MA	INKNP0156A
2015-05-26	MA	INKNP0156A
2016-07-11	MA	INKNP0156A
2017-05-27	MA	INKNP0156A
2018-03-28	MW	INKNP0156A
2013-08-07	KM	INKNP0157A
2014-10-13	MW	INKNP0157A
2013-07-22	KM	INKNP0159A
2013-07-27	KM	INKNP0159A
2013-08-08	KM	INKNP0159A
2017-07-12	MW	INKNP0159A
2017-10-05	MW	INKNP0159A
2017-11-04	MW	INKNP0159A
2013-08-23	MW	INKNP0160A
2017-04-04	KM	INKNP0160A
2018-01-05	KM	INKNP0160A
2013-07-09	KM	INKNP0161A
2014-01-08	KM	INKNP0161A
2015-03-27	MW	INKNP0161A
2017-04-18	KM	INKNP0161A
2017-11-06	KM	INKNP0161A
2013-07-09	KM	INKNP0162A
2017-02-25	MW	INKNP0162A
2017-03-02	MW	INKNP0162A
2017-11-02	KM	INKNP0162A
2013-06-10	MA	INKNP0163A
2014-03-11	MA	INKNP0163A
2014-04-15	MA	INKNP0163A
2014-05-21	MA	INKNP0163A
2015-06-06	MW	INKNP0163A
2016-06-20	MA	INKNP0163A
2016-12-17	KM	INKNP0163A
2017-11-17	MA	INKNP0163A
2013-06-10	MA	INKNP0164A
2013-12-22	MW	INKNP0164A
2014-03-11	MA	INKNP0164A
2016-08-01	MA	INKNP0164A
2016-08-22	MW	INKNP0164A
2016-10-04	MA	INKNP0164A
2016-10-26	MA	INKNP0164A
2016-12-06	MW	INKNP0164A
2017-03-01	MW	INKNP0164A
2013-06-11	KM	INKNP0165A
2013-09-11	KM	INKNP0166A
2014-05-28	KM	INKNP0166A
2015-01-07	MW	INKNP0166A
2015-04-12	KM	INKNP0166A
2017-05-25	MW	INKNP0166A
2013-09-11	KM	INKNP0167A
2017-04-24	MW	INKNP0167A
2013-05-12	KM	INKNP0168A
2013-11-19	MA	INKNP0168A
2017-01-31	KM	INKNP0168A
2017-02-18	MW	INKNP0168A
2017-11-19	MW	INKNP0168A
2013-05-12	KM	INKNP0169A
2014-05-15	KM	INKNP0169A
2013-01-20	KM	INKNP0170A
2013-05-12	KM	INKNP0170A
2013-06-10	MA	INKNP0170A
2016-07-10	KM	INKNP0170A
2017-11-14	KM	INKNP0170A
2018-01-04	KM	INKNP0170A
2013-05-13	MW	INKNP0172A
2014-07-14	KM	INKNP0172A
2014-12-29	MW	INKNP0172A
2016-10-08	KM	INKNP0172A
2016-10-18	KM	INKNP0172A
2016-11-03	KM	INKNP0172A
2016-11-15	MW	INKNP0172A
2013-08-14	MW	INKNP0173A
2015-11-13	KM	INKNP0173A
2016-09-14	MA	INKNP0173A
2013-08-14	MW	INKNP0174A
2015-09-22	MA	INKNP0174A
2016-10-04	MA	INKNP0174A
2016-10-11	MA	INKNP0174A
2017-05-14	MA	INKNP0174A
2017-06-28	MW	INKNP0174A
2014-06-14	KM	INKNP0175A
2013-09-22	KM	INKNP0176A
2017-09-25	MA	INKNP0176A
2013-09-22	KM	INKNP0177A
2014-12-04	MW	INKNP0177A
2015-04-22	MW	INKNP0177A
2015-09-12	KM	INKNP0177A
2017-10-18	MW	INKNP0177A
2013-09-22	KM	INKNP0178A
2014-04-03	KM	INKNP0178A
2014-10-03	MW	INKNP0178A
2014-10-06	MA	INKNP0178A
2014-10-13	MW	INKNP0178A
2014-10-28	KM	INKNP0178A
2015-09-12	KM	INKNP0178A
2016-10-30	KM	INKNP0178A
2017-01-23	KM	INKNP0178A
2017-03-29	MW	INKNP0178A
2017-05-01	MW	INKNP0178A
2013-07-24	KM	INKNP0179A
2013-12-12	KM	INKNP0179A
2014-05-01	MW	INKNP0179A
2015-11-17	KM	INKNP0179A
2013-07-24	KM	INKNP0180A
2013-09-28	KM	INKNP0180A
2013-11-30	MW	INKNP0180A
2013-12-07	KM	INKNP0180A
2014-01-07	KM	INKNP0180A
2014-01-08	KM	INKNP0180A
2014-01-09	KM	INKNP0180A
2014-04-20	KM	INKNP0180A
2014-05-15	KM	INKNP0180A
2014-05-16	KM	INKNP0180A
2014-05-17	KM	INKNP0180A
2014-06-26	KM	INKNP0180A
2014-07-08	KM	INKNP0180A
2014-11-16	KM	INKNP0180A
2015-05-05	KM	INKNP0180A
2016-12-24	KM	INKNP0180A
2017-04-27	KM	INKNP0180A
2013-07-24	KM	INKNP0181A
2015-02-20	MW	INKNP0181A
2016-09-17	KM	INKNP0181A
2017-03-02	MW	INKNP0181A
2017-04-11	KM	INKNP0181A
2018-01-05	KM	INKNP0181A
2013-07-24	KM	INKNP0182A
2014-04-20	KM	INKNP0182A
2014-04-28	KM	INKNP0182A
2014-06-14	KM	INKNP0182A
2014-06-18	KM	INKNP0182A
2014-08-12	KM	INKNP0182A
2014-08-15	KM	INKNP0182A
2015-03-26	KM	INKNP0182A
2016-07-10	KM	INKNP0182A
2016-10-19	MW	INKNP0182A
2017-05-16	MW	INKNP0182A
2017-10-21	KM	INKNP0182A
2013-07-25	KM	INKNP0183A
2017-04-26	MW	INKNP0183A
2017-05-16	MW	INKNP0183A
2017-06-10	MW	INKNP0183A
2013-07-25	KM	INKNP0184A
2013-09-17	MA	INKNP0184A
2013-07-25	KM	INKNP0185A
2014-04-07	KM	INKNP0185A
2014-05-02	KM	INKNP0185A
2014-05-14	KM	INKNP0185A
2014-05-15	KM	INKNP0185A
2015-05-14	MA	INKNP0185A
2016-02-19	MW	INKNP0185A
2016-07-18	KM	INKNP0185A
2016-08-19	MA	INKNP0185A
2017-02-02	MW	INKNP0185A
2017-10-26	KM	INKNP0185A
2017-11-17	MA	INKNP0185A
2017-12-01	MW	INKNP0185A
2018-01-15	KM	INKNP0185A
2013-07-25	KM	INKNP0186A
2014-04-20	KM	INKNP0186A
2014-09-11	MW	INKNP0186A
2014-09-29	KM	INKNP0186A
2015-03-26	KM	INKNP0186A
2013-01-26	KM	INKNP0187A
2015-11-04	KM	INKNP0187A
2013-01-26	KM	INKNP0188A
2015-04-10	MA	INKNP0188A
2016-05-12	MA	INKNP0188A
2013-09-26	MW	INKNP0189A
2014-12-11	MW	INKNP0189A
2017-04-12	MW	INKNP0189A
2013-08-12	MW	INKNP0190A
2014-10-11	MW	INKNP0190A
2015-08-11	KM	INKNP0190A
2017-02-01	MW	INKNP0190A
2017-02-25	MW	INKNP0190A
2017-06-17	MW	INKNP0190A
2017-07-12	MW	INKNP0190A
2017-09-23	MW	INKNP0190A
2016-12-09	MW	INKNP0191A
2017-04-18	KM	INKNP0191A
2017-04-29	MW	INKNP0191A
2014-01-10	KM	INKNP0192A
2015-07-23	KM	INKNP0192A
2016-08-19	MA	INKNP0192A
2016-11-01	MW	INKNP0192A
2017-04-11	KM	INKNP0192A
2017-04-12	MW	INKNP0192A
2017-05-16	MW	INKNP0192A
2017-09-22	KM	INKNP0192A
2017-12-04	KM	INKNP0192A
2018-02-08	MW	INKNP0192A
2015-03-26	KM	INKNP0193A
2015-05-04	KM	INKNP0193A
2016-07-10	KM	INKNP0193A
2016-10-11	MA	INKNP0193A
2017-04-10	KM	INKNP0193A
2017-04-27	KM	INKNP0193A
2017-05-11	KM	INKNP0193A
2017-07-11	KM	INKNP0193A
2013-12-29	MW	INKNP0194A
2016-07-10	KM	INKNP0194A
2016-09-07	MA	INKNP0194A
2016-09-14	MA	INKNP0194A
2014-05-15	KM	INKNP0195A
2014-12-06	KM	INKNP0195A
2017-02-14	MW	INKNP0195A
2013-02-17	KM	INKNP0196A
2015-04-11	MA	INKNP0196A
2017-03-28	MW	INKNP0196A
2017-11-22	KM	INKNP0196A
2017-12-31	MW	INKNP0196A
2014-05-06	KM	INKNP0197A
2015-05-02	KM	INKNP0197A
2016-07-10	KM	INKNP0197A
2016-11-25	KM	INKNP0197A
2014-05-17	KM	INKNP0198A
2015-05-14	MA	INKNP0198A
2015-05-26	MA	INKNP0198A
2016-08-19	MA	INKNP0198A
2013-09-18	MA	INKNP0201A
2013-11-19	MA	INKNP0201A
2014-05-17	KM	INKNP0201A
2014-10-06	MA	INKNP0201A
2016-07-23	MA	INKNP0201A
2016-10-19	KM	INKNP0201A
2016-11-03	KM	INKNP0201A
2014-01-11	KM	INKNP0202A
2014-07-26	MW	INKNP0202A
2014-07-27	MW	INKNP0202A
2014-11-11	KM	INKNP0202A
2015-03-17	MW	INKNP0202A
2016-11-03	KM	INKNP0202A
2017-04-18	KM	INKNP0202A
2018-03-27	MW	INKNP0202A
2014-04-28	KM	INKNP0203A
2016-11-15	MW	INKNP0203A
2014-04-21	KM	INKNP0204A
2014-05-06	KM	INKNP0204A
2016-05-10	KM	INKNP0204A
2016-10-28	KM	INKNP0204A
2017-11-20	KM	INKNP0204A
2014-05-11	KM	INKNP0205A
2014-05-12	MW	INKNP0205A
2017-11-24	KM	INKNP0205A
2013-08-08	KM	INKNP0207A
2015-11-03	KM	INKNP0207A
2016-07-20	KM	INKNP0207A
2016-10-18	KM	INKNP0207A
2018-03-31	KM	INKNP0207A
2017-04-18	KM	INKNP0208A
2017-06-13	MW	INKNP0208A
2013-12-20	MW	INKNP0209A
2016-10-11	MA	INKNP0209A
2017-03-02	MW	INKNP0209A
2018-01-05	KM	INKNP0209A
2014-10-02	KM	INKNP0210A
2016-07-10	KM	INKNP0210A
2016-09-05	KM	INKNP0210A
2016-11-03	KM	INKNP0210A
2015-04-10	KM	INKNP0211A
2013-10-10	KM	INKNP0212A
2015-04-22	MW	INKNP0212A
2017-03-27	KM	INKNP0212A
2014-04-15	MA	INKNP0213A
2014-05-11	KM	INKNP0213A
2014-05-17	KM	INKNP0213A
2016-07-10	KM	INKNP0213A
2017-04-18	KM	INKNP0213A
2017-06-14	KM	INKNP0213A
2014-05-15	KM	INKNP0214A
2014-11-05	MA	INKNP0214A
2015-03-04	KM	INKNP0214A
2017-03-01	MW	INKNP0214A
2017-06-30	MW	INKNP0214A
2017-12-05	MW	INKNP0214A
2013-12-29	MW	INKNP0216A
2014-05-04	KM	INKNP0220A
2014-05-28	MA	INKNP0220A
2015-11-20	KM	INKNP0220A
2014-01-03	KM	INKNP0221A
2014-04-14	KM	INKNP0221A
2015-03-11	KM	INKNP0221A
2016-07-13	KM	INKNP0221A
2017-01-04	KM	INKNP0221A
2017-12-08	KM	INKNP0221A
2018-01-02	KM	INKNP0221A
2014-01-13	KM	INKNP0222A
2014-07-18	KM	INKNP0222A
2014-08-11	KM	INKNP0222A
2014-08-12	KM	INKNP0222A
2015-03-26	KM	INKNP0222A
2016-12-02	KM	INKNP0222A
2017-11-18	MW	INKNP0222A
2017-11-22	KM	INKNP0222A
2013-11-04	KM	INKNP0223A
2013-11-30	KM	INKNP0223A
2014-05-14	KM	INKNP0223A
2014-05-22	MW	INKNP0223A
2015-05-02	KM	INKNP0223A
2015-11-20	KM	INKNP0223A
2016-07-18	KM	INKNP0223A
2016-07-19	KM	INKNP0223A
2017-03-29	MW	INKNP0223A
2017-11-02	KM	INKNP0223A
2017-11-14	MW	INKNP0223A
2017-11-24	KM	INKNP0223A
2018-01-09	KM	INKNP0223A
2013-11-04	KM	INKNP0224A
2014-01-08	KM	INKNP0224A
2015-06-18	KM	INKNP0224A
2016-07-10	KM	INKNP0224A
2016-12-02	KM	INKNP0224A
2018-03-31	KM	INKNP0224A
2013-11-09	MA	INKNP0225A
2017-07-22	KM	INKNP0225A
2013-11-19	MA	INKNP0226A
2014-06-29	MW	INKNP0226A
2015-11-20	KM	INKNP0226A
2016-07-23	MA	INKNP0226A
2016-10-26	MW	INKNP0226A
2017-06-09	MW	INKNP0226A
2017-06-30	MW	INKNP0226A
2017-11-25	KM	INKNP0226A
2018-03-24	MW	INKNP0226A
2013-11-19	MA	INKNP0227A
2017-05-01	MW	INKNP0227A
2013-11-19	MA	INKNP0228A
2014-04-13	MA	INKNP0228A
2014-11-20	MA	INKNP0228A
2015-05-05	MA	INKNP0228A
2015-05-21	MA	INKNP0228A
2015-05-26	MA	INKNP0228A
2018-03-24	KM	INKNP0228A
2013-11-19	MA	INKNP0229A
2014-11-05	MA	INKNP0229A
2016-05-19	MA	INKNP0229A
2016-07-23	MA	INKNP0229A
2017-04-18	KM	INKNP0229A
2017-11-19	MW	INKNP0229A
2013-11-19	MA	INKNP0230A
2013-07-24	KM	INKNP0231A
2013-10-10	KM	INKNP0231A
2013-11-19	MA	INKNP0231A
2014-03-12	KM	INKNP0231A
2014-09-23	KM	INKNP0231A
2015-01-04	MW	INKNP0231A
2015-09-10	KM	INKNP0231A
2017-02-25	MW	INKNP0231A
2017-04-10	KM	INKNP0231A
2017-12-06	MW	INKNP0231A
2013-11-19	MA	INKNP0232A
2014-06-05	KM	INKNP0232A
2014-06-14	KM	INKNP0232A
2015-03-26	KM	INKNP0232A
2015-05-14	MA	INKNP0232A
2017-11-10	MW	INKNP0232A
2013-11-19	MA	INKNP0233A
2014-01-08	KM	INKNP0233A
2014-10-07	MA	INKNP0233A
2016-07-10	KM	INKNP0233A
2017-11-08	KM	INKNP0233A
2017-12-08	KM	INKNP0233A
2013-11-19	MA	INKNP0234A
2016-12-06	MW	INKNP0234A
2013-11-19	MA	INKNP0235A
2014-05-15	KM	INKNP0235A
2017-04-13	KM	INKNP0235A
2013-11-19	MA	INKNP0236A
2014-09-03	MA	INKNP0236A
2013-11-19	MA	INKNP0237A
2014-05-20	MA	INKNP0237A
2013-11-19	MA	INKNP0238A
2017-04-08	MW	INKNP0238A
2013-11-19	MA	INKNP0241A
2014-05-15	KM	INKNP0241A
2014-05-16	KM	INKNP0241A
2014-06-04	KM	INKNP0241A
2016-07-13	KM	INKNP0241A
2017-04-14	MW	INKNP0241A
2017-04-18	KM	INKNP0241A
2017-11-14	MW	INKNP0241A
2018-03-27	MW	INKNP0241A
2013-11-19	MA	INKNP0242A
2014-10-23	KM	INKNP0242A
2017-05-09	MW	INKNP0242A
2017-11-05	MW	INKNP0242A
2013-11-19	MA	INKNP0243A
2014-01-09	KM	INKNP0243A
2014-03-11	KM	INKNP0243A
2014-05-21	MA	INKNP0243A
2015-04-22	MW	INKNP0243A
2016-07-11	MA	INKNP0243A
2017-05-01	MW	INKNP0243A
2018-03-02	MW	INKNP0243A
2013-11-19	MA	INKNP0244A
2014-01-09	KM	INKNP0244A
2014-04-14	KM	INKNP0244A
2014-04-15	MA	INKNP0244A
2014-05-14	KM	INKNP0244A
2014-05-15	KM	INKNP0244A
2015-05-21	MA	INKNP0244A
2015-05-26	MA	INKNP0244A
2016-09-14	MA	INKNP0244A
2017-08-19	MA	INKNP0244A
2017-12-09	KM	INKNP0244A
2013-06-10	MA	INKNP0245A
2013-09-17	MA	INKNP0245A
2013-09-18	MA	INKNP0245A
2013-11-19	MA	INKNP0245A
2014-05-20	MA	INKNP0245A
2015-04-11	MA	INKNP0245A
2016-07-11	MA	INKNP0245A
2016-07-23	MA	INKNP0245A
2016-09-14	MA	INKNP0245A
2017-08-18	MA	INKNP0245A
2013-07-06	MW	INKNP0246A
2013-11-19	MA	INKNP0246A
2014-01-02	KM	INKNP0246A
2014-06-14	KM	INKNP0246A
2015-08-18	KM	INKNP0246A
2018-01-15	KM	INKNP0246A
2013-11-19	MA	INKNP0247A
2014-01-09	KM	INKNP0247A
2014-05-15	KM	INKNP0247A
2014-10-11	MW	INKNP0247A
2015-03-17	KM	INKNP0247A
2015-05-26	MA	INKNP0247A
2017-04-27	KM	INKNP0247A
2017-05-25	MW	INKNP0247A
2013-11-19	MA	INKNP0248A
2013-11-19	MA	INKNP0249A
2016-10-11	MA	INKNP0249A
2017-06-01	KM	INKNP0249A
2013-11-19	MA	INKNP0250A
2014-05-21	MA	INKNP0250A
2014-06-03	MA	INKNP0250A
2014-10-07	MA	INKNP0250A
2014-11-12	MA	INKNP0250A
2017-03-02	MW	INKNP0250A
2013-11-19	MA	INKNP0251A
2015-04-21	MW	INKNP0251A
2013-11-19	MA	INKNP0252A
2014-01-08	KM	INKNP0252A
2014-01-09	KM	INKNP0252A
2014-01-15	KM	INKNP0252A
2014-05-06	KM	INKNP0252A
2014-05-15	KM	INKNP0252A
2017-11-13	MW	INKNP0252A
2013-12-22	MW	INKNP0254A
2013-12-22	MW	INKNP0255A
2013-12-22	MW	INKNP0256A
2014-01-22	KM	INKNP0256A
2015-01-04	MW	INKNP0256A
2015-09-10	MA	INKNP0256A
2015-11-04	KM	INKNP0256A
2017-02-18	MW	INKNP0256A
2017-08-28	KM	INKNP0256A
2013-12-22	MW	INKNP0257A
2017-12-09	KM	INKNP0257A
2013-12-22	MW	INKNP0258A
2014-01-08	KM	INKNP0258A
2014-01-09	KM	INKNP0258A
2015-11-03	KM	INKNP0258A
2018-02-03	MW	INKNP0258A
2013-11-15	MW	INKNP0259A
2016-10-08	MW	INKNP0259A
2013-06-24	KM	INKNP0260A
2016-12-01	MW	INKNP0260A
2014-07-06	MW	INKNP0261A
2013-07-06	MW	INKNP0262A
2014-01-08	KM	INKNP0262A
2015-05-04	KM	INKNP0262A
2016-07-09	KM	INKNP0262A
2016-07-23	MA	INKNP0262A
2017-04-27	KM	INKNP0262A
2017-04-29	KM	INKNP0262A
2017-05-04	KM	INKNP0262A
2017-12-05	KM	INKNP0262A
2013-06-10	MA	INKNP0263A
2015-04-10	MA	INKNP0263A
2013-06-10	MA	INKNP0265A
2017-04-18	KM	INKNP0265A
2013-06-10	MA	INKNP0266A
2015-04-13	MA	INKNP0266A
2016-07-08	MA	INKNP0266A
2017-02-01	MW	INKNP0266A
2013-06-10	MA	INKNP0267A
2014-05-20	MA	INKNP0267A
2014-11-12	MA	INKNP0267A
2014-11-20	MA	INKNP0267A
2015-04-21	MW	INKNP0267A
2016-10-19	MA	INKNP0267A
2017-11-19	MW	INKNP0267A
2017-12-09	KM	INKNP0267A
2013-08-23	MW	INKNP0268A
2014-10-23	KM	INKNP0268A
2016-07-18	KM	INKNP0268A
2014-01-07	KM	INKNP0269A
2014-05-15	KM	INKNP0269A
2017-01-21	MW	INKNP0269A
2014-01-07	KM	INKNP0270A
2014-04-15	MA	INKNP0270A
2013-09-18	MA	INKNP0271A
2013-12-04	KM	INKNP0271A
2014-10-29	MA	INKNP0271A
2015-04-11	MA	INKNP0271A
2015-05-14	MA	INKNP0271A
2016-07-13	KM	INKNP0271A
2017-01-31	KM	INKNP0271A
2017-11-06	KM	INKNP0271A
2013-09-17	MA	INKNP0272A
2013-09-27	MA	INKNP0272A
2013-11-30	KM	INKNP0272A
2014-05-21	MA	INKNP0272A
2014-07-08	MA	INKNP0272A
2014-08-19	MA	INKNP0272A
2014-10-06	MA	INKNP0272A
2014-10-29	MA	INKNP0272A
2015-04-13	MA	INKNP0272A
2015-09-22	MA	INKNP0272A
2016-07-11	MA	INKNP0272A
2017-08-18	MA	INKNP0272A
2017-08-25	MA	INKNP0272A
2013-11-30	KM	INKNP0273A
2014-05-17	KM	INKNP0273A
2014-12-04	MW	INKNP0273A
2015-04-22	MW	INKNP0273A
2015-05-14	MA	INKNP0273A
2015-09-10	MA	INKNP0273A
2016-07-13	KM	INKNP0273A
2016-10-18	KM	INKNP0273A
2017-02-02	KM	INKNP0273A
2017-08-18	MA	INKNP0273A
2017-08-19	MA	INKNP0273A
2017-12-01	MW	INKNP0273A
2013-11-30	MW	INKNP0274A
2017-04-29	MW	INKNP0274A
2018-01-04	KM	INKNP0274A
2013-11-30	MW	INKNP0275A
2015-05-04	KM	INKNP0275A
2013-07-06	MW	INKNP0276A
2013-11-13	MW	INKNP0276A
2013-11-29	MW	INKNP0276A
2013-12-13	MW	INKNP0276A
2014-03-17	MW	INKNP0276A
2014-03-30	KM	INKNP0276A
2014-05-15	KM	INKNP0276A
2014-07-30	MW	INKNP0276A
2014-08-13	MW	INKNP0276A
2015-04-22	MW	INKNP0276A
2015-05-04	KM	INKNP0276A
2016-11-08	MW	INKNP0276A
2017-11-24	MW	INKNP0276A
2013-10-06	KM	INKNP0277A
2014-07-29	KM	INKNP0277A
2017-06-01	KM	INKNP0277A
2017-10-26	KM	INKNP0277A
2013-08-08	KM	INKNP0278A
2014-01-08	KM	INKNP0278A
2014-05-24	MW	INKNP0278A
2014-10-06	MA	INKNP0278A
2016-07-13	KM	INKNP0278A
2016-08-18	MA	INKNP0278A
2013-08-08	KM	INKNP0279A
2013-11-26	KM	INKNP0279A
2014-04-15	MA	INKNP0279A
2014-06-04	KM	INKNP0279A
2014-07-08	MA	INKNP0279A
2016-07-10	KM	INKNP0279A
2016-07-23	MA	INKNP0279A
2016-08-19	MA	INKNP0279A
2016-09-14	MA	INKNP0279A
2016-10-22	KM	INKNP0279A
2016-10-26	MA	INKNP0279A
2016-11-28	KM	INKNP0279A
2017-03-27	KM	INKNP0279A
2017-04-27	KM	INKNP0279A
2017-10-26	KM	INKNP0279A
2017-12-13	KM	INKNP0279A
2013-06-29	KM	INKNP0280A
2013-08-08	KM	INKNP0280A
2014-06-04	MA	INKNP0280A
2014-07-14	KM	INKNP0280A
2016-06-09	MW	INKNP0280A
2017-02-01	MW	INKNP0280A
2013-09-18	MA	INKNP0281A
2015-05-07	MW	INKNP0281A
2013-09-18	MA	INKNP0282A
2015-04-13	MA	INKNP0282A
2015-05-21	MA	INKNP0282A
2016-07-23	MA	INKNP0282A
2017-01-12	KM	INKNP0282A
2013-09-18	MA	INKNP0283A
2013-09-27	MA	INKNP0283A
2014-07-08	MA	INKNP0283A
2013-09-18	MA	INKNP0284A
2015-01-07	MW	INKNP0284A
2015-11-25	MA	INKNP0284A
2016-07-23	MA	INKNP0284A
2016-08-19	MA	INKNP0284A
2017-12-08	KM	INKNP0284A
2018-01-05	KM	INKNP0284A
2018-03-02	MW	INKNP0284A
2013-12-29	MW	INKNP0285A
2013-12-30	MW	INKNP0285A
2017-02-11	KM	INKNP0285A
2017-05-27	MW	INKNP0285A
2017-06-10	MW	INKNP0285A
2015-03-26	MW	INKNP0286A
2015-04-22	MW	INKNP0286A
2016-07-13	KM	INKNP0286A
2017-03-01	MW	INKNP0286A
2017-04-10	KM	INKNP0286A
2017-04-27	MW	INKNP0286A
2014-01-02	MW	INKNP0287A
2014-01-02	MW	INKNP0288A
2013-12-19	MW	INKNP0289A
2014-06-05	KM	INKNP0289A
2016-08-19	KM	INKNP0289A
2017-11-07	MW	INKNP0289A
2017-11-24	KM	INKNP0289A
2018-03-24	MW	INKNP0289A
2013-12-12	KM	INKNP0290A
2017-02-02	KM	INKNP0290A
2017-11-01	KM	INKNP0290A
2013-05-05	KM	INKNP0291A
2014-05-02	KM	INKNP0291A
2014-05-05	KM	INKNP0291A
2014-05-15	KM	INKNP0291A
2018-02-02	MW	INKNP0291A
2018-02-28	MW	INKNP0291A
2013-06-22	KM	INKNP0292A
2013-07-11	KM	INKNP0292A
2014-04-29	KM	INKNP0292A
2017-07-12	KM	INKNP0292A
2018-03-10	KM	INKNP0292A
2013-07-11	KM	INKNP0293A
2013-11-24	KM	INKNP0293A
2013-07-14	MW	INKNP0294A
2013-08-23	MW	INKNP0294A
2016-07-13	KM	INKNP0294A
2017-02-02	KM	INKNP0294A
2017-03-01	MW	INKNP0294A
2018-02-22	KM	INKNP0294A
2013-07-06	MW	INKNP0295A
2013-11-04	KM	INKNP0296A
2016-09-18	KM	INKNP0296A
2017-11-02	KM	INKNP0296A
2013-11-24	KM	INKNP0297A
2013-12-01	KM	INKNP0297A
2014-06-17	KM	INKNP0297A
2016-07-10	KM	INKNP0297A
2013-12-01	KM	INKNP0298A
2014-04-05	KM	INKNP0298A
2015-05-02	KM	INKNP0298A
2016-08-01	MA	INKNP0298A
2017-05-12	MW	INKNP0298A
2013-12-01	KM	INKNP0299A
2014-10-29	MA	INKNP0299A
2014-11-12	MA	INKNP0299A
2016-03-11	MW	INKNP0299A
2013-04-18	KM	INKNP0300A
2014-09-09	KM	INKNP0301A
2016-08-19	KM	INKNP0301A
2016-09-28	KM	INKNP0301A
2014-05-17	KM	INKNP0302A
2014-05-19	KM	INKNP0302A
2014-06-22	MA	INKNP0303A
2014-10-26	MA	INKNP0303A
2014-11-12	MA	INKNP0303A
2017-08-25	MA	INKNP0303A
2015-05-05	MA	INKNP0304A
2014-01-09	KM	INKNP0305A
2013-03-16	KM	INKNP0306A
2014-01-09	KM	INKNP0306A
2014-05-07	MW	INKNP0306A
2014-05-15	KM	INKNP0306A
2014-10-31	KM	INKNP0306A
2015-11-25	KM	INKNP0306A
2016-07-20	KM	INKNP0306A
2016-12-31	KM	INKNP0306A
2017-08-27	KM	INKNP0306A
2014-01-08	KM	INKNP0307A
2015-05-03	KM	INKNP0307A
2017-11-25	KM	INKNP0307A
2018-02-14	KM	INKNP0307A
2014-01-08	KM	INKNP0308A
2015-03-26	KM	INKNP0308A
2018-03-06	KM	INKNP0308A
2014-01-08	KM	INKNP0309A
2013-05-03	KM	INKNP0310A
2013-08-02	KM	INKNP0310A
2014-01-08	KM	INKNP0310A
2014-05-20	MA	INKNP0310A
2014-06-04	MA	INKNP0310A
2014-10-29	MA	INKNP0310A
2015-03-26	KM	INKNP0310A
2015-07-08	KM	INKNP0310A
2016-08-18	MA	INKNP0310A
2016-08-19	MA	INKNP0310A
2016-08-22	MA	INKNP0310A
2016-09-14	MA	INKNP0310A
2016-10-04	MA	INKNP0310A
2017-08-18	MA	INKNP0310A
2014-01-08	KM	INKNP0311A
2014-01-09	KM	INKNP0311A
2017-02-25	MW	INKNP0311A
2017-04-27	KM	INKNP0311A
2014-01-08	KM	INKNP0312A
2015-11-20	KM	INKNP0312A
2016-06-20	MA	INKNP0312A
2017-04-12	MW	INKNP0312A
2017-04-18	KM	INKNP0312A
2017-04-26	MA	INKNP0312A
2017-08-18	MA	INKNP0312A
2017-08-19	MA	INKNP0312A
2014-01-08	KM	INKNP0313A
2015-03-17	KM	INKNP0313A
2016-10-11	MA	INKNP0313A
2018-01-01	MW	INKNP0313A
2018-03-06	KM	INKNP0313A
2014-01-08	KM	INKNP0314A
2014-03-11	MA	INKNP0314A
2014-03-19	MA	INKNP0314A
2014-05-21	MA	INKNP0314A
2014-05-22	MA	INKNP0314A
2015-04-13	MA	INKNP0314A
2015-09-10	MA	INKNP0314A
2016-08-19	MA	INKNP0314A
2016-09-07	MA	INKNP0314A
2016-10-19	MA	INKNP0314A
2016-10-26	MA	INKNP0314A
2017-04-13	MA	INKNP0314A
2017-05-14	MA	INKNP0314A
2017-08-19	MA	INKNP0314A
2014-10-06	MA	INKNP0315A
2015-04-13	MA	INKNP0315A
2014-01-08	KM	INKNP0316A
2014-01-08	KM	INKNP0317A
2014-01-09	KM	INKNP0317A
2015-05-04	KM	INKNP0317A
2015-11-04	KM	INKNP0317A
2016-04-19	KM	INKNP0317A
2016-05-25	KM	INKNP0317A
2016-07-13	KM	INKNP0317A
2016-07-20	KM	INKNP0317A
2017-06-12	KM	INKNP0317A
2017-10-13	KM	INKNP0317A
2014-01-08	KM	INKNP0318A
2015-03-26	KM	INKNP0318A
2014-01-08	KM	INKNP0319A
2014-03-11	MA	INKNP0319A
2014-05-21	MA	INKNP0319A
2014-06-03	MA	INKNP0319A
2015-01-04	MW	INKNP0319A
2014-01-08	KM	INKNP0320A
2014-04-08	KM	INKNP0320A
2013-09-17	MA	INKNP0321A
2014-01-08	KM	INKNP0321A
2014-05-15	KM	INKNP0321A
2014-06-14	KM	INKNP0321A
2014-10-06	MA	INKNP0321A
2015-05-03	KM	INKNP0321A
2015-05-26	MA	INKNP0321A
2016-09-14	MA	INKNP0321A
2016-10-04	MA	INKNP0321A
2017-01-23	KM	INKNP0321A
2017-08-19	MA	INKNP0321A
2017-12-04	KM	INKNP0321A
2018-03-06	KM	INKNP0321A
2014-01-08	KM	INKNP0322A
2014-05-21	MA	INKNP0322A
2014-01-08	KM	INKNP0323A
2014-01-09	KM	INKNP0324A
2014-05-24	MW	INKNP0324A
2014-10-13	MW	INKNP0324A
2015-05-03	KM	INKNP0324A
2016-10-18	MW	INKNP0324A
2014-01-09	KM	INKNP0325A
2014-05-15	KM	INKNP0325A
2015-11-04	KM	INKNP0325A
2016-10-09	KM	INKNP0325A
2017-03-02	MW	INKNP0325A
2017-10-26	KM	INKNP0325A
2018-03-10	KM	INKNP0325A
2014-01-09	KM	INKNP0326A
2015-05-14	MA	INKNP0326A
2015-05-26	MA	INKNP0326A
2017-08-18	MA	INKNP0326A
2017-08-19	MA	INKNP0326A
2017-08-25	MA	INKNP0326A
2014-01-09	KM	INKNP0327A
2014-01-09	KM	INKNP0328A
2014-01-09	KM	INKNP0329A
2016-02-16	MW	INKNP0329A
2017-02-01	MW	INKNP0329A
2017-12-09	KM	INKNP0329A
2014-01-09	KM	INKNP0330A
2014-04-15	MA	INKNP0330A
2016-07-10	KM	INKNP0330A
2016-10-04	MA	INKNP0330A
2018-03-31	KM	INKNP0330A
2014-01-09	KM	INKNP0331A
2016-04-14	KM	INKNP0331A
2016-11-08	KM	INKNP0331A
2014-01-09	KM	INKNP0332A
2014-07-03	KM	INKNP0332A
2017-04-13	KM	INKNP0332A
2014-01-09	KM	INKNP0333A
2015-01-26	KM	INKNP0333A
2015-03-04	KM	INKNP0333A
2017-12-01	KM	INKNP0333A
2014-01-09	KM	INKNP0334A
2017-04-11	KM	INKNP0334A
2017-11-09	KM	INKNP0334A
2014-01-09	KM	INKNP0335A
2015-05-04	KM	INKNP0335A
2014-01-09	KM	INKNP0336A
2014-01-09	KM	INKNP0337A
2016-10-19	KM	INKNP0337A
2014-04-19	KM	INKNP0338A
2014-05-24	MW	INKNP0338A
2015-03-17	KM	INKNP0338A
2016-05-01	KM	INKNP0338A
2017-02-03	KM	INKNP0338A
2017-05-25	MW	INKNP0338A
2017-11-06	KM	INKNP0338A
2017-12-15	KM	INKNP0338A
2014-07-29	MA	INKNP0339A
2014-10-29	MA	INKNP0339A
2014-11-05	MA	INKNP0339A
2015-03-24	KM	INKNP0339A
2015-09-10	MA	INKNP0339A
2014-04-29	MW	INKNP0340A
2014-05-24	MW	INKNP0340A
2017-11-07	MW	INKNP0340A
2014-07-08	MA	INKNP0341A
2015-05-05	MA	INKNP0341A
2013-10-06	KM	INKNP0342A
2014-05-06	KM	INKNP0342A
2015-07-08	MW	INKNP0342A
2015-11-03	KM	INKNP0342A
2017-04-18	KM	INKNP0342A
2013-10-06	KM	INKNP0343A
2014-11-16	KM	INKNP0343A
2013-10-06	KM	INKNP0344A
2016-07-13	KM	INKNP0344A
2017-05-26	MW	INKNP0344A
2013-10-06	KM	INKNP0345A
2015-06-06	MW	INKNP0345A
2015-09-02	MW	INKNP0345A
2016-07-10	KM	INKNP0345A
2017-02-13	MW	INKNP0345A
2013-10-10	KM	INKNP0347A
2013-11-24	KM	INKNP0348A
2016-09-15	KM	INKNP0348A
2017-06-27	MW	INKNP0348A
2013-08-02	KM	INKNP0349A
2014-07-08	MA	INKNP0349A
2017-05-27	MA	INKNP0349A
2017-11-17	MA	INKNP0349A
2013-11-26	KM	INKNP0350A
2014-05-17	KM	INKNP0351A
2015-05-21	MA	INKNP0351A
2016-07-10	KM	INKNP0351A
2017-08-19	MA	INKNP0351A
2013-11-14	MA	INKNP0352A
2015-05-11	MA	INKNP0352A
2016-07-10	KM	INKNP0352A
2016-07-11	MA	INKNP0352A
2017-03-06	KM	INKNP0352A
2017-04-13	KM	INKNP0352A
2013-11-02	KM	INKNP0353A
2014-10-30	KM	INKNP0353A
2017-12-09	MW	INKNP0353A
2013-10-01	MA	INKNP0354A
2013-11-14	MA	INKNP0354A
2014-04-15	MA	INKNP0354A
2014-05-28	MA	INKNP0354A
2015-03-26	KM	INKNP0354A
2016-07-13	KM	INKNP0354A
2017-02-18	MW	INKNP0354A
2013-12-09	KM	INKNP0355A
2014-05-07	MW	INKNP0355A
2014-05-28	MA	INKNP0355A
2013-12-12	KM	INKNP0356A
2014-05-15	KM	INKNP0356A
2015-04-23	MW	INKNP0356A
2015-07-15	MW	INKNP0356A
2015-12-15	KM	INKNP0356A
2013-12-12	KM	INKNP0357A
2014-09-09	KM	INKNP0357A
2017-04-07	KM	INKNP0357A
2013-10-16	KM	INKNP0358A
2013-08-02	KM	INKNP0360A
2013-12-12	KM	INKNP0360A
2014-04-05	KM	INKNP0360A
2015-02-28	KM	INKNP0360A
2017-04-27	KM	INKNP0360A
2013-12-12	KM	INKNP0361A
2013-12-12	KM	INKNP0362A
2016-07-23	MA	INKNP0362A
2017-01-23	KM	INKNP0362A
2017-02-02	KM	INKNP0362A
2017-03-01	MW	INKNP0362A
2017-11-29	KM	INKNP0362A
2018-01-03	KM	INKNP0362A
2018-01-07	MW	INKNP0362A
2014-05-01	KM	INKNP0363A
2014-05-11	KM	INKNP0363A
2017-04-13	KM	INKNP0363A
2013-12-24	KM	INKNP0364A
2014-06-14	KM	INKNP0364A
2014-06-18	KM	INKNP0364A
2017-04-10	KM	INKNP0364A
2017-05-25	MW	INKNP0364A
2015-03-04	KM	INKNP0365A
2013-12-12	KM	INKNP0366A
2016-07-13	KM	INKNP0366A
2017-11-24	KM	INKNP0366A
2013-12-12	KM	INKNP0367A
2014-04-15	MA	INKNP0367A
2015-11-17	KM	INKNP0367A
2016-02-26	KM	INKNP0367A
2017-03-01	MW	INKNP0367A
2017-11-05	MW	INKNP0367A
2013-09-17	MA	INKNP0368A
2013-12-12	KM	INKNP0368A
2014-04-03	KM	INKNP0368A
2014-05-18	KM	INKNP0368A
2014-12-16	KM	INKNP0368A
2015-09-06	KM	INKNP0368A
2016-09-18	KM	INKNP0368A
2017-03-02	MW	INKNP0368A
2017-04-18	KM	INKNP0368A
2017-10-07	KM	INKNP0368A
2017-10-26	KM	INKNP0368A
2014-01-13	KM	INKNP0369A
2014-12-16	KM	INKNP0369A
2014-01-15	KM	INKNP0370A
2014-04-05	KM	INKNP0370A
2014-04-19	KM	INKNP0370A
2013-04-10	KM	INKNP0371A
2014-05-06	KM	INKNP0371A
2014-05-15	KM	INKNP0371A
2015-11-04	KM	INKNP0371A
2016-07-10	KM	INKNP0371A
2016-11-03	KM	INKNP0371A
2014-04-03	KM	INKNP0372A
2017-04-09	MW	INKNP0372A
2014-04-03	KM	INKNP0373A
2017-01-23	KM	INKNP0373A
2017-06-17	MW	INKNP0373A
2014-05-02	KM	INKNP0374A
2015-05-04	KM	INKNP0374A
2016-07-13	KM	INKNP0374A
2016-10-18	KM	INKNP0374A
2016-10-28	KM	INKNP0374A
2017-05-29	KM	INKNP0374A
2018-01-04	KM	INKNP0374A
2018-01-17	KM	INKNP0374A
2014-04-03	KM	INKNP0375A
2014-11-11	MA	INKNP0375A
2016-07-13	KM	INKNP0375A
2017-07-11	KM	INKNP0375A
2014-04-03	KM	INKNP0376A
2015-04-23	MW	INKNP0376A
2014-04-05	KM	INKNP0377A
2016-07-20	KM	INKNP0377A
2014-04-05	KM	INKNP0378A
2017-05-27	MW	INKNP0378A
2014-04-15	MA	INKNP0379A
2014-05-02	KM	INKNP0379A
2014-09-03	MA	INKNP0379A
2014-09-12	MA	INKNP0379A
2014-10-06	MA	INKNP0379A
2016-07-10	KM	INKNP0379A
2016-07-23	MA	INKNP0379A
2016-10-04	MA	INKNP0379A
2017-04-12	MW	INKNP0379A
2017-08-19	MA	INKNP0379A
2018-01-15	KM	INKNP0379A
2014-04-15	MA	INKNP0380A
2014-05-09	KM	INKNP0380A
2015-11-16	KM	INKNP0380A
2016-07-10	KM	INKNP0380A
2016-07-22	MA	INKNP0380A
2016-07-23	MA	INKNP0380A
2016-08-19	MA	INKNP0380A
2016-10-04	MA	INKNP0380A
2017-04-27	KM	INKNP0380A
2014-04-15	MA	INKNP0381A
2016-07-23	MA	INKNP0381A
2017-10-26	KM	INKNP0381A
2017-12-06	KM	INKNP0381A
2018-03-02	MW	INKNP0381A
2013-04-28	KM	INKNP0382A
2014-04-20	KM	INKNP0382A
2014-04-30	KM	INKNP0382A
2015-04-21	MW	INKNP0382A
2016-03-02	KM	INKNP0382A
2017-01-23	KM	INKNP0382A
2017-04-13	KM	INKNP0382A
2017-04-29	MW	INKNP0382A
2017-12-05	KM	INKNP0382A
2014-04-15	MA	INKNP0383A
2014-10-07	MA	INKNP0383A
2015-11-04	KM	INKNP0383A
2016-12-08	MW	INKNP0383A
2017-10-12	KM	INKNP0383A
2017-11-02	KM	INKNP0383A
2014-04-15	MA	INKNP0384A
2016-07-13	KM	INKNP0384A
2014-04-15	MA	INKNP0385A
2014-11-25	MA	INKNP0385A
2015-05-21	MA	INKNP0385A
2015-11-03	KM	INKNP0385A
2014-04-15	MA	INKNP0386A
2016-03-02	KM	INKNP0386A
2017-01-24	MW	INKNP0386A
2014-04-15	MA	INKNP0387A
2017-03-06	MW	INKNP0387A
2017-05-14	MW	INKNP0387A
2017-12-04	KM	INKNP0387A
2017-04-04	MW	INKNP0388A
2014-04-24	KM	INKNP0389A
2014-04-15	MA	INKNP0391A
2016-12-13	MW	INKNP0391A
2014-02-06	MA	INKNP0392A
2014-03-11	MA	INKNP0392A
2014-04-15	MA	INKNP0392A
2014-05-28	MA	INKNP0392A
2014-10-29	MA	INKNP0392A
2015-04-11	MA	INKNP0392A
2016-10-26	MA	INKNP0392A
2017-09-22	KM	INKNP0392A
2014-04-15	MA	INKNP0393A
2014-05-27	KM	INKNP0393A
2016-07-13	KM	INKNP0393A
2017-11-17	MW	INKNP0393A
2013-11-05	KM	INKNP0394A
2014-03-16	KM	INKNP0394A
2015-11-04	KM	INKNP0394A
2016-09-15	KM	INKNP0394A
2016-09-29	KM	INKNP0394A
2017-04-12	KM	INKNP0394A
2017-04-19	KM	INKNP0394A
2017-11-18	MW	INKNP0394A
2014-04-15	MA	INKNP0395A
2015-04-11	MA	INKNP0395A
2014-04-15	MA	INKNP0396A
2014-05-25	MA	INKNP0396A
2015-05-21	MA	INKNP0396A
2016-05-19	MA	INKNP0396A
2016-06-16	KM	INKNP0396A
2014-03-11	MA	INKNP0397A
2014-04-15	MA	INKNP0397A
2014-05-19	MW	INKNP0397A
2014-11-05	MA	INKNP0397A
2015-09-02	MW	INKNP0397A
2016-02-16	MW	INKNP0397A
2016-05-12	MA	INKNP0397A
2016-07-11	MA	INKNP0397A
2017-11-08	KM	INKNP0397A
2018-03-28	MW	INKNP0397A
2014-04-29	KM	INKNP0398A
2014-05-06	KM	INKNP0398A
2014-05-29	KM	INKNP0398A
2014-05-03	KM	INKNP0399A
2014-05-16	KM	INKNP0399A
2015-04-21	MW	INKNP0399A
2015-11-03	KM	INKNP0399A
2017-01-19	MW	INKNP0399A
2018-03-07	MW	INKNP0399A
2014-04-29	KM	INKNP0401A
2017-05-01	MW	INKNP0401A
2014-04-29	KM	INKNP0402A
2016-11-17	KM	INKNP0402A
2014-07-08	MA	INKNP0403A
2018-01-05	MW	INKNP0403A
2014-05-05	MW	INKNP0404A
2014-05-16	KM	INKNP0404A
2016-06-07	KM	INKNP0404A
2016-07-10	KM	INKNP0404A
2017-11-14	KM	INKNP0404A
2014-05-06	KM	INKNP0405A
2014-05-17	KM	INKNP0405A
2015-03-17	KM	INKNP0405A
2015-05-04	KM	INKNP0405A
2016-07-13	KM	INKNP0405A
2016-07-20	KM	INKNP0405A
2017-02-02	KM	INKNP0405A
2017-04-29	MW	INKNP0405A
2018-02-10	MW	INKNP0405A
2014-04-17	KM	INKNP0406A
2014-05-17	KM	INKNP0406A
2015-04-10	KM	INKNP0406A
2017-02-02	KM	INKNP0406A
2014-05-14	KM	INKNP0407A
2015-04-21	MW	INKNP0407A
2015-04-22	MW	INKNP0407A
2016-03-07	KM	INKNP0407A
2018-02-17	KM	INKNP0407A
2014-05-25	KM	INKNP0408A
2017-12-06	MW	INKNP0408A
2014-04-19	KM	INKNP0410A
2014-05-05	MW	INKNP0410A
2014-05-15	KM	INKNP0410A
2014-11-02	KM	INKNP0410A
2015-05-02	KM	INKNP0410A
2017-09-18	KM	INKNP0410A
[truncated: 1,839 more rows]
