# Supplementary material for: Residency, movement patterns, behavior and demographics of reef manta rays in Komodo National Park
Source: PeerJ. 2022 May 16;10:e13302. doi: 10.7717/peerj.13302 (PMC9119296; doi:10.7717/peerj.13302)
Supplement: Supplemental Information 11 — The data details the sex and maturity status of each individual identified based on itsidentification code. [file peerj-10-13302-s011.xlsx]

## Sheet: Sheet1
ID MM	Sex	Age
INKNP0001A	F	A
INKNP0002A	M	A
INKNP0003A	F	U
INKNP0004A	F	U
INKNP0005A	F	U
INKNP0006A	F	U
INKNP0007A	M	A
INKNP0008A	F	U
INKNP0009A	M	A
INKNP0010A	F	U
INKNP0011A	M	A
INKNP0012A	F	A
INKNP0013A	F	A
INKNP0015A	F	U
INKNP0016A	F	A
INKNP0018A	F	A
INKNP0019A	F	A
INKNP0020A	M	A
INKNP0021A	F	A
INKNP0022A	F	A
INKNP0023A	M	A
INKNP0024A	F	U
INKNP0025A	M	A
INKNP0026A	M	A
INKNP0027A	F	A
INKNP0028A	F	A
INKNP0029A	M	A
INKNP0030A	M	A
INKNP0031A	M	A
INKNP0032A	M	A
INKNP0033A	M	A
INKNP0034A	F	A
INKNP0035A	F	A
INKNP0036A	M	A
INKNP0038A	F	A
INKNP0039A	F	U
INKNP0040A	F	A
INKNP0041A	F	A
INKNP0042A	M	A
INKNP0043A	M	J
INKNP0044A	F	A
INKNP0045A	M	A
INKNP0046A	F	U
INKNP0047A	F	U
INKNP0048A	M	A
INKNP0049A	F	U
INKNP0050A	F	A
INKNP0051A	F	U
INKNP0052A	M	A
INKNP0053A	M	A
INKNP0054A	F	U
INKNP0055A	F	A
INKNP0056A	F	A
INKNP0058A	M	A
INKNP0059A	M	A
INKNP0060A	U	U
INKNP0061A	F	U
INKNP0062A	M	A
INKNP0063A	M	A
INKNP0064A	F	A
INKNP0065A	F	A
INKNP0066A	F	U
INKNP0067A	F	U
INKNP0068A	F	A
INKNP0069A	U	U
INKNP0070A	M	A
INKNP0071A	M	A
INKNP0072A	F	A
INKNP0074A	M	A
INKNP0075A	F	A
INKNP0076A	F	A
INKNP0077A	M	A
INKNP0078A	M	A
INKNP0079A	F	A
INKNP0080A	M	A
INKNP0081A	F	U
INKNP0082A	F	A
INKNP0083A	F	A
INKNP0084A	F	U
INKNP0085A	F	A
INKNP0086A	M	A
INKNP0087A	F	U
INKNP0088A	M	A
INKNP0089A	M	A
INKNP0090A	F	U
INKNP0091A	M	A
INKNP0092A	M	A
INKNP0093A	F	U
INKNP0094A	F	U
INKNP0095A	F	U
INKNP0096A	F	U
INKNP0097A	M	A
INKNP0098A	M	A
INKNP0099A	F	A
INKNP0100A	M	A
INKNP0101A	M	A
INKNP0102A	M	A
INKNP0103A	M	A
INKNP0104A	F	A
INKNP0105A	M	A
INKNP0106A	M	A
INKNP0107A	F	U
INKNP0108A	M	A
INKNP0109A	M	A
INKNP0110A	F	U
INKNP0111A	M	J
INKNP0112A	F	U
INKNP0113A	F	U
INKNP0114A	F	U
INKNP0115A	F	A
INKNP0116A	M	A
INKNP0117A	M	A
INKNP0118A	M	J
INKNP0119A	F	A
INKNP0120A	M	A
INKNP0121A	F	A
INKNP0122A	M	A
INKNP0123A	F	A
INKNP0124A	M	A
INKNP0125A	M	A
INKNP0126A	F	U
INKNP0127A	M	A
INKNP0128A	M	A
INKNP0129A	M	A
INKNP0130A	M	A
INKNP0131A	F	U
INKNP0132A	M	A
INKNP0133A	F	A
INKNP0134A	F	A
INKNP0135A	F	U
INKNP0136A	M	A
INKNP0137A	M	A
INKNP0138A	M	A
INKNP0139A	F	U
INKNP0140A	M	A
INKNP0141A	M	A
INKNP0142A	F	U
INKNP0145A	M	A
INKNP0146A	F	A
INKNP0147A	F	A
INKNP0148A	F	A
INKNP0149A	M	A
INKNP0150A	F	A
INKNP0151A	F	U
INKNP0152A	F	U
INKNP0153A	M	A
INKNP0154A	F	A
INKNP0155A	F	U
INKNP0156A	F	A
INKNP0157A	M	A
INKNP0159A	F	A
INKNP0160A	F	U
INKNP0161A	F	U
INKNP0162A	F	A
INKNP0163A	F	U
INKNP0164A	F	U
INKNP0165A	F	U
INKNP0166A	M	A
INKNP0167A	F	A
INKNP0168A	F	U
INKNP0169A	M	A
INKNP0170A	M	A
INKNP0171A	F	U
INKNP0172A	F	U
INKNP0173A	M	A
INKNP0174A	M	A
INKNP0175A	M	A
INKNP0176A	M	A
INKNP0177A	M	A
INKNP0178A	F	A
INKNP0179A	M	A
INKNP0180A	F	A
INKNP0181A	F	A
INKNP0182A	M	A
INKNP0183A	M	A
INKNP0184A	F	A
INKNP0185A	F	A
INKNP0186A	F	A
INKNP0187A	F	U
INKNP0188A	F	U
INKNP0189A	M	A
INKNP0190A	M	A
INKNP0191A	F	U
INKNP0192A	F	A
INKNP0193A	F	A
INKNP0194A	F	A
INKNP0195A	M	A
INKNP0196A	F	A
INKNP0197A	M	A
INKNP0198A	F	A
INKNP0201A	M	A
INKNP0202A	F	A
INKNP0203A	F	A
INKNP0204A	F	A
INKNP0205A	M	A
INKNP0207A	M	A
INKNP0208A	M	A
INKNP0209A	F	U
INKNP0210A	F	A
INKNP0211A	F	U
INKNP0212A	F	A
INKNP0213A	M	A
INKNP0214A	M	A
INKNP0216A	F	U
INKNP0220A	M	A
INKNP0221A	F	A
INKNP0222A	M	A
INKNP0223A	F	A
INKNP0224A	M	A
INKNP0225A	M	A
INKNP0226A	F	A
INKNP0227A	F	U
INKNP0228A	M	A
INKNP0229A	M	A
INKNP0230A	M	A
INKNP0231A	F	A
INKNP0232A	F	A
INKNP0233A	M	A
INKNP0234A	M	A
INKNP0235A	M	A
INKNP0236A	M	A
INKNP0237A	M	J
INKNP0238A	M	A
INKNP0241A	F	A
INKNP0242A	M	A
INKNP0243A	M	A
INKNP0244A	M	A
INKNP0245A	M	A
INKNP0246A	F	U
INKNP0247A	M	A
INKNP0248A	M	J
INKNP0249A	M	A
INKNP0250A	F	U
INKNP0251A	F	U
INKNP0252A	F	U
INKNP0254A	U	U
INKNP0255A	M	A
INKNP0256A	M	A
INKNP0257A	F	A
INKNP0258A	M	A
INKNP0259A	F	U
INKNP0260A	M	A
INKNP0261A	F	U
INKNP0262A	M	A
INKNP0263A	F	U
INKNP0265A	F	U
INKNP0266A	F	A
INKNP0267A	F	U
INKNP0268A	M	A
INKNP0269A	M	A
INKNP0270A	F	U
INKNP0271A	M	A
INKNP0272A	M	A
INKNP0273A	F	A
INKNP0274A	F	U
INKNP0275A	U	U
INKNP0276A	F	U
INKNP0277A	M	A
INKNP0278A	F	A
INKNP0279A	M	A
INKNP0280A	M	A
INKNP0281A	M	A
INKNP0282A	F	A
INKNP0283A	U	U
INKNP0284A	F	A
INKNP0285A	M	A
INKNP0286A	M	A
INKNP0287A	F	A
INKNP0288A	M	A
INKNP0289A	F	U
INKNP0290A	M	A
INKNP0291A	F	A
INKNP0292A	M	A
INKNP0293A	M	SA
INKNP0294A	M	A
INKNP0295A	U	U
INKNP0296A	M	A
INKNP0297A	M	A
INKNP0298A	M	A
INKNP0299A	F	U
INKNP0300A	F	U
INKNP0301A	M	A
INKNP0302A	F	U
INKNP0303A	M	A
INKNP0304A	F	U
INKNP0305A	F	U
INKNP0306A	F	A
INKNP0307A	M	A
INKNP0308A	F	A
INKNP0309A	F	U
INKNP0310A	F	A
INKNP0311A	F	A
INKNP0312A	M	A
INKNP0313A	F	A
INKNP0314A	F	A
INKNP0315A	M	J
INKNP0316A	F	U
INKNP0317A	M	A
INKNP0318A	F	U
INKNP0319A	F	U
INKNP0320A	U	U
INKNP0321A	M	A
INKNP0322A	M	A
INKNP0323A	M	A
INKNP0324A	M	A
INKNP0325A	F	A
INKNP0326A	F	A
INKNP0327A	F	A
INKNP0328A	F	A
INKNP0329A	M	A
INKNP0330A	F	U
INKNP0331A	F	A
INKNP0332A	F	U
INKNP0333A	F	U
INKNP0334A	F	U
INKNP0335A	F	U
INKNP0336A	F	U
INKNP0337A	F	U
INKNP0338A	M	A
INKNP0339A	U	U
INKNP0340A	M	A
INKNP0341A	F	A
INKNP0342A	M	A
INKNP0343A	M	A
INKNP0344A	M	A
INKNP0345A	M	A
INKNP0347A	M	A
INKNP0348A	M	A
INKNP0349A	M	A
INKNP0350A	U	U
INKNP0351A	M	A
INKNP0352A	F	U
INKNP0353A	M	A
INKNP0354A	F	A
INKNP0355A	M	J
INKNP0356A	F	U
INKNP0357A	F	A
INKNP0358A	F	U
INKNP0360A	M	A
INKNP0361A	F	U
INKNP0362A	F	A
INKNP0363A	F	U
INKNP0364A	M	A
INKNP0365A	M	J
INKNP0366A	F	A
INKNP0367A	F	A
INKNP0368A	F	A
INKNP0369A	U	U
INKNP0370A	F	A
INKNP0371A	F	U
INKNP0372A	M	A
INKNP0373A	F	U
INKNP0374A	F	A
INKNP0375A	M	A
INKNP0376A	F	A
INKNP0377A	M	A
INKNP0378A	F	U
INKNP0379A	F	A
INKNP0380A	M	A
INKNP0381A	M	A
INKNP0382A	F	A
INKNP0383A	F	U
INKNP0384A	M	A
INKNP0385A	M	A
INKNP0386A	F	U
INKNP0387A	F	U
INKNP0388A	F	A
INKNP0389A	M	A
INKNP0391A	M	A
INKNP0392A	F	U
INKNP0393A	F	A
INKNP0394A	M	A
INKNP0395A	M	A
INKNP0396A	F	A
INKNP0397A	F	A
INKNP0398A	M	A
INKNP0399A	U	U
INKNP0401A	F	U
INKNP0402A	F	A
INKNP0403A	F	U
INKNP0404A	M	A
INKNP0405A	F	A
INKNP0406A	M	A
INKNP0407A	F	A
INKNP0408A	F	U
INKNP0410A	M	A
INKNP0411A	M	A
INKNP0412A	F	U
INKNP0413A	M	A
INKNP0414A	F	A
INKNP0415A	M	A
INKNP0416A	F	A
INKNP0418A	F	U
INKNP0419A	M	A
INKNP0420A	M	A
INKNP0421A	M	A
INKNP0422A	M	J
INKNP0423A	M	A
INKNP0424A	F	U
INKNP0425A	F	A
INKNP0426A	F	A
INKNP0427A	M	A
INKNP0428A	M	A
INKNP0430A	F	A
INKNP0431A	M	A
INKNP0432A	M	A
INKNP0433A	F	A
INKNP0436A	F	A
INKNP0437A	M	A
INKNP0438A	M	A
INKNP0439A	F	A
INKNP0440A	M	A
INKNP0441A	F	U
INKNP0444A	M	A
INKNP0445A	F	A
INKNP0446A	M	A
INKNP0447A	M	J
INKNP0448A	M	A
INKNP0449A	F	A
INKNP0450A	F	U
INKNP0451A	M	A
INKNP0452A	F	U
INKNP0453A	M	A
INKNP0454A	M	A
INKNP0455A	M	A
INKNP0456A	F	U
INKNP0457A	U	U
INKNP0458A	U	U
INKNP0459A	F	U
INKNP0460A	M	A
INKNP0461A	M	A
INKNP0462A	F	A
INKNP0463A	M	A
INKNP0464A	F	A
INKNP0466A	M	A
INKNP0467A	M	A
INKNP0468A	M	A
INKNP0469A	U	U
INKNP0470A	M	A
INKNP0471A	M	SA
INKNP0472A	M	A
INKNP0473A	M	A
INKNP0474A	M	A
INKNP0475A	M	A
INKNP0476A	M	A
INKNP0477A	F	A
INKNP0478A	F	A
INKNP0479A	M	A
INKNP0482A	U	U
INKNP0483A	M	A
INKNP0484A	M	A
INKNP0485A	F	U
INKNP0486A	M	A
INKNP0487A	M	A
INKNP0488A	F	A
INKNP0489A	F	A
INKNP0491A	F	U
INKNP0492A	M	A
INKNP0493A	M	A
INKNP0494A	M	A
INKNP0495A	M	A
INKNP0496A	M	A
INKNP0497A	F	U
INKNP0498A	F	U
INKNP0499A	U	U
INKNP0500A	F	A
INKNP0501A	M	A
INKNP0502A	M	A
INKNP0503A	M	A
INKNP0504A	F	U
INKNP0505A	F	A
INKNP0506A	M	A
INKNP0507A	M	A
INKNP0509A	F	U
INKNP0511A	F	A
INKNP0512A	M	A
INKNP0513A	M	A
INKNP0514A	M	A
INKNP0515A	M	A
INKNP0516A	M	A
INKNP0517A	F	U
INKNP0518A	M	A
INKNP0519A	F	U
INKNP0520A	F	U
INKNP0521A	F	U
INKNP0522A	F	U
INKNP0523A	F	A
INKNP0524A	F	A
INKNP0525A	M	A
INKNP0526A	F	U
INKNP0527A	F	A
INKNP0528A	F	U
INKNP0529A	M	A
INKNP0530A	F	A
INKNP0532A	M	A
INKNP0533A	M	A
INKNP0534A	F	A
INKNP0535A	F	U
INKNP0536A	M	A
INKNP0538A	F	A
INKNP0540A	M	J
INKNP0541A	F	A
INKNP0542A	F	U
INKNP0543A	M	A
INKNP0544A	F	U
INKNP0545A	M	A
INKNP0546A	F	U
INKNP0547A	M	A
INKNP0548A	F	U
INKNP0549A	M	A
INKNP0550A	M	A
INKNP0551A	M	A
INKNP0552A	M	A
INKNP0553A	M	A
INKNP0554A	F	A
INKNP0555A	M	A
INKNP0556A	M	A
INKNP0557A	M	A
INKNP0558A	M	A
INKNP0559A	U	U
INKNP0560A	F	U
INKNP0561A	F	U
INKNP0563A	M	A
INKNP0564A	F	A
INKNP0565A	M	A
INKNP0567A	M	A
INKNP0568A	F	U
INKNP0570A	F	U
INKNP0571A	F	A
INKNP0572A	M	A
INKNP0574A	F	U
INKNP0575A	F	A
INKNP0576A	U	U
INKNP0577A	M	SA
INKNP0578A	U	U
INKNP0579A	F	A
INKNP0580A	F	U
INKNP0581A	F	U
INKNP0582A	F	A
INKNP0583A	F	U
INKNP0584A	F	U
INKNP0585A	M	A
INKNP0586A	M	A
INKNP0587A	M	A
INKNP0588A	F	U
INKNP0589A	F	U
INKNP0590A	M	A
INKNP0591A	F	A
INKNP0592A	F	U
INKNP0593A	U	U
INKNP0594A	F	A
INKNP0595A	M	A
INKNP0596A	M	A
INKNP0597A	M	A
INKNP0598A	M	A
INKNP0599A	F	A
INKNP0600A	M	A
INKNP0601A	M	A
INKNP0602A	M	A
INKNP0603A	M	J
INKNP0604A	M	A
INKNP0605A	F	U
INKNP0607A	F	U
INKNP0608A	F	U
INKNP0609A	F	U
INKNP0610A	M	A
INKNP0611A	F	A
INKNP0612A	F	A
INKNP0613A	M	A
INKNP0614A	F	A
INKNP0615A	U	U
INKNP0616A	M	A
INKNP0617A	M	A
INKNP0618A	F	A
INKNP0619A	F	A
INKNP0620A	M	A
INKNP0621A	M	A
INKNP0622A	M	A
INKNP0623A	U	U
INKNP0624A	M	A
INKNP0625A	F	A
INKNP0626A	F	A
INKNP0627A	M	A
INKNP0628A	M	A
INKNP0629A	M	A
INKNP0630A	F	A
INKNP0631A	M	A
INKNP0632A	M	A
INKNP0633A	M	A
INKNP0634A	F	U
INKNP0635A	M	A
INKNP0636A	F	A
INKNP0637A	F	A
INKNP0638A	F	A
INKNP0639A	M	A
INKNP0640A	M	A
INKNP0641A	M	A
INKNP0642A	F	U
INKNP0643A	F	U
INKNP0644A	F	U
INKNP0645A	M	A
INKNP0646A	M	A
INKNP0647A	M	A
INKNP0648A	F	A
INKNP0649A	F	A
INKNP0650A	M	A
INKNP0651A	M	A
INKNP0652A	F	A
INKNP0653A	F	U
INKNP0654A	M	A
INKNP0655A	U	U
INKNP0656A	F	U
INKNP0657A	F	U
INKNP0658A	F	U
INKNP0659A	M	A
INKNP0660A	M	A
INKNP0661A	M	A
INKNP0662A	F	U
INKNP0663A	M	A
INKNP0664A	M	A
INKNP0665A	F	U
INKNP0666A	F	A
INKNP0667A	F	U
INKNP0669A	M	A
INKNP0670A	M	SA
INKNP0671A	F	A
INKNP0672A	M	A
INKNP0673A	M	A
INKNP0674A	M	A
INKNP0675A	F	A
INKNP0676A	F	A
INKNP0677A	F	U
INKNP0678A	F	A
INKNP0679A	M	J
INKNP0680A	M	A
INKNP0682A	F	A
INKNP0684A	F	A
INKNP0685A	M	A
INKNP0687A	M	A
INKNP0688A	F	A
INKNP0689A	F	U
INKNP0690A	M	A
INKNP0691A	F	U
INKNP0692A	M	A
INKNP0693A	F	U
INKNP0694A	M	A
INKNP0695A	F	U
INKNP0696A	M	A
INKNP0698A	M	A
INKNP0699A	M	A
INKNP0700A	M	J
INKNP0701A	F	U
INKNP0702A	M	A
INKNP0703A	M	A
INKNP0704A	M	SA
INKNP0705A	F	U
INKNP0706A	M	J
INKNP0707A	M	A
INKNP0708A	F	A
INKNP0709A	F	A
INKNP0710A	F	A
INKNP0711A	M	A
INKNP0712A	M	A
INKNP0713A	M	A
INKNP0714A	M	A
INKNP0716A	F	A
INKNP0717A	M	A
INKNP0719A	F	A
INKNP0720A	M	A
INKNP0721A	M	A
INKNP0722A	M	SA
INKNP0723A	F	A
INKNP0724A	M	A
INKNP0725A	M	A
INKNP0726A	U	U
INKNP0727A	F	U
INKNP0728A	M	A
INKNP0729A	M	A
INKNP0730A	M	A
INKNP0731A	F	U
INKNP0732A	F	A
INKNP0733A	F	A
INKNP0734A	F	U
INKNP0735A	F	A
INKNP0736A	M	A
INKNP0737A	F	U
INKNP0738A	F	U
INKNP0739A	F	U
INKNP0740A	F	U
INKNP0742A	M	A
INKNP0743A	F	U
INKNP0744A	M	A
INKNP0745A	F	U
INKNP0746A	F	A
INKNP0747A	M	J
INKNP0748A	F	A
INKNP0749A	M	SA
INKNP0750A	F	A
INKNP0751A	M	A
INKNP0752A	F	A
INKNP0753A	M	A
INKNP0754A	F	U
INKNP0755A	M	A
INKNP0756A	M	A
INKNP0757A	M	A
INKNP0758A	M	A
INKNP0759A	M	A
INKNP0760A	F	A
INKNP0761A	M	A
INKNP0762A	M	A
INKNP0763A	F	U
INKNP0764A	M	A
INKNP0765A	F	U
INKNP0766A	F	A
INKNP0767A	F	U
INKNP0768A	F	U
INKNP0769A	F	A
INKNP0770A	F	A
INKNP0771A	F	U
INKNP0772A	M	A
INKNP0774A	F	A
INKNP0775A	F	A
INKNP0776A	F	U
INKNP0777A	F	A
INKNP0778A	F	A
INKNP0779A	F	A
INKNP0780A	F	U
INKNP0781A	M	A
INKNP0782A	F	U
INKNP0783A	F	U
INKNP0784A	F	A
INKNP0785A	F	A
INKNP0786A	M	A
INKNP0787A	M	A
INKNP0788A	U	U
INKNP0790A	M	A
INKNP0791A	M	A
INKNP0792A	M	A
INKNP0793A	F	U
INKNP0794A	M	A
INKNP0795A	M	A
INKNP0796A	M	A
INKNP0797A	U	U
INKNP0798A	F	U
INKNP0799A	F	U
INKNP0800A	F	U
INKNP0801A	F	U
INKNP0802A	U	U
INKNP0805A	M	A
INKNP0806A	F	U
INKNP0807A	M	A
INKNP0808A	U	U
INKNP0809A	M	A
INKNP0810A	F	U
INKNP0811A	M	A
INKNP0812A	M	A
INKNP0813A	F	U
INKNP0814A	M	A
INKNP0815A	M	A
INKNP0816A	M	A
INKNP0817A	F	U
INKNP0818A	F	U
INKNP0819A	M	J
INKNP0820A	M	J
INKNP0821A	F	U
INKNP0822A	F	U
INKNP0823A	F	A
INKNP0824A	F	U
INKNP0825A	M	A
INKNP0826A	M	A
INKNP0827A	M	A
INKNP0828A	F	A
INKNP0829A	M	A
INKNP0830A	F	U
INKNP0831A	F	A
INKNP0832A	M	A
INKNP0833A	M	A
INKNP0834A	F	A
INKNP0835A	F	A
INKNP0836A	F	U
INKNP0837A	F	U
INKNP0838A	M	A
INKNP0839A	F	U
INKNP0840A	M	A
INKNP0842A	M	J
INKNP0843A	F	U
INKNP0844A	F	U
INKNP0845A	F	U
INKNP0846A	F	U
INKNP0847A	U	U
INKNP0848A	M	A
INKNP0849A	M	SA
INKNP0851A	M	A
INKNP0852A	M	A
INKNP0853A	F	U
INKNP0855A	M	A
INKNP0856A	F	U
INKNP0857A	M	A
INKNP0858A	M	A
INKNP0859A	F	U
INKNP0860A	F	A
INKNP0861A	M	A
INKNP0862A	F	A
INKNP0864A	F	U
INKNP0865A	F	U
INKNP0866A	M	SA
INKNP0867A	F	U
INKNP0868A	M	A
INKNP0869A	M	A
INKNP0870A	F	U
INKNP0871A	M	A
INKNP0872A	M	A
INKNP0873A	M	A
INKNP0874A	U	U
INKNP0875A	F	U
INKNP0876A	F	U
INKNP0877A	F	U
INKNP0878A	M	A
INKNP0879A	U	U
INKNP0880A	M	A
INKNP0881A	M	A
INKNP0882A	M	A
INKNP0883A	M	J
INKNP0884A	U	U
INKNP0886A	M	A
INKNP0887A	F	A
INKNP0888A	M	A
INKNP0889A	M	A
INKNP0890A	M	SA
INKNP0891A	U	U
INKNP0892A	M	A
INKNP0893A	M	A
INKNP0894A	M	A
INKNP0896A	M	A
INKNP0897A	F	U
INKNP0898A	F	A
INKNP0899A	F	U
INKNP0900A	M	A
INKNP0901A	F	U
INKNP0902A	M	A
INKNP0904A	F	U
INKNP0905A	F	A
INKNP0906A	F	U
INKNP0907A	F	U
INKNP0908A	F	U
INKNP0909A	M	A
INKNP0910A	M	A
INKNP0912A	M	A
INKNP0913A	F	U
INKNP0914A	F	U
INKNP0915A	M	A
INKNP0916A	F	A
INKNP0917A	M	A
INKNP0918A	M	A
INKNP0920A	U	U
INKNP0922A	F	U
INKNP0923A	F	U
INKNP0924A	F	U
INKNP0925A	F	U
INKNP0926A	F	U
INKNP0927A	U	U
INKNP0928A	U	U
INKNP0931A	F	A
INKNP0932A	F	A
INKNP0933A	M	A
INKNP0934A	M	A
INKNP0935A	F	A
INKNP0937A	M	A
INKNP0938A	M	A
INKNP0940A	F	U
INKNP0941A	M	A
INKNP0943A	M	A
INKNP0944A	F	U
INKNP0945A	M	A
INKNP0946A	F	U
INKNP0947A	F	U
INKNP0948A	M	A
INKNP0949A	F	U
INKNP0950A	F	U
INKNP0952A	U	U
INKNP0953A	F	U
INKNP0954A	M	SA
INKNP0955A	F	A
INKNP0956A	U	U
INKNP0957A	M	A
INKNP0958A	M	A
INKNP0960A	M	A
INKNP0961A	M	A
INKNP0962A	F	U
INKNP0963A	F	U
INKNP0965A	M	A
INKNP0966A	F	U
INKNP0967A	U	U
INKNP0968A	F	U
INKNP0969A	F	U
INKNP0971A	M	J
INKNP0973A	M	J
INKNP0974A	M	J
INKNP0975A	M	J
INKNP0976A	M	J
INKNP0977A	M	A
INKNP0978A	F	U
INKNP0979A	M	A
INKNP0980A	F	U
INKNP0981A	F	U
INKNP0982A	M	A
INKNP0983A	F	U
INKNP0984A	F	A
INKNP0985A	M	SA
INKNP0987A	U	U
INKNP0988A	M	A
INKNP0989A	M	A
INKNP0990A	M	A
INKNP0991A	F	U
INKNP0992A	M	A
INKNP0993A	M	J
INKNP0994A	M	A
INKNP0995A	F	U
INKNP0996A	M	J
INKNP0997A	F	U
INKNP0998A	U	U
INKNP0999A	M	A
INKNP1000A	M	J
INKNP1002A	M	A
INKNP1003A	M	A
INKNP1004A	M	A
INKNP1005A	F	A
INKNP1006A	F	U
INKNP1009A	M	A
INKNP1010A	F	U
INKNP1011A	M	SA
INKNP1013A	M	A
INKNP1014A	M	J
INKNP1015A	F	U
INKNP1016A	F	U
INKNP1017A	M	J
INKNP1018A	M	SA
INKNP1019A	M	A
INKNP1020A	M	A
INKNP1022A	M	A
INKNP1023A	U	U
INKNP1024A	M	J
INKNP1025A	M	A
INKNP1027A	M	J
INKNP1028A	U	U
INKNP1029A	M	A
INKNP1030A	F	U
INKNP1031A	M	A
INKNP1032A	M	SA
INKNP1033A	F	U
INKNP1034A	F	U
INKNP1035A	M	A
INKNP1036A	M	A
INKNP1037A	F	U
INKNP1039A	M	A
INKNP1040A	U	U
INKNP1041A	F	A
INKNP1042A	F	U
INKNP1043A	M	A
INKNP1044A	M	J
INKNP1045A	M	SA
INKNP1046A	M	A
INKNP1047A	M	A
INKNP1050A	F	A
INKNP1051A	F	U
INKNP1052A	M	A
INKNP1053A	M	A
INKNP1054A	M	J
INKNP1055A	F	U
INKNP1056A	U	U
INKNP1057A	M	A
INKNP1059A	M	J
INKNP1060A	F	U
INKNP1063A	M	SA
INKNP1064A	U	U
INKNP1065A	F	U
INKNP1067A	M	A
INKNP1068A	F	U
INKNP1069A	U	U
INKNP1070A	F	U
INKNP1071A	U	U
INKNP1072A	M	J
INKNP1073A	M	J
INKNP1074A	U	U
INKNP1075A	U	U
INKNP1076A	M	J
INKNP1077A	U	U
INKNP1078A	F	U
INKNP1079A	F	U
INKNP1080A	F	U
INKNP1081A	M	J
INKNP1082A	F	U
INKNP1083A	M	A
INKNP1084A	M	A
INKNP1085A	F	U
INKNP1086A	F	U
INKNP1087A	F	U
INKNP1089A	M	J
INKNP1090A	F	A
INKNP1091A	F	A
INKNP1092A	F	U
INKNP1093A	U	U
INKNP1094A	M	A
INKNP1095A	F	U
INKNP1096A	M	A
INKNP1097A	F	U
INKNP1098A	M	J
INKNP1099A	F	U
INKNP1100A	M	A
INKNP1101A	F	U
INKNP1102A	F	U
INKNP1103A	U	U
INKNP1104A	M	A
INKNP1105A	F	U
INKNP1106A	F	U
INKNP1107A	M	A
INKNP1108A	M	A
INKNP1109A	U	U
INKNP1110A	M	A
INKNP1111A	M	A
INKNP1112A	M	A
INKNP1113A	F	U
INKNP1114A	M	A
INKNP1115A	M	A
INKNP1116A	F	U
INKNP1117A	F	U
INKNP1118A	M	J
INKNP1119A	F	U
INKNP1120A	M	A
INKNP1122A	U	U
INKNP1123A	U	U
INKNP1124A	M	A
INKNP1125A	F	U
INKNP1126A	F	U
INKNP1127A	M	A
INKNP1128A	F	U
INKNP1129A	M	SA
INKNP1130A	F	U
INKNP1131A	F	U
INKNP1134A	U	U
INKNP1135A	F	U
INKNP1136A	F	U
INKNP1137A	F	U
INKNP1138A	M	A
INKNP1139A	U	U
INKNP1140A	F	A
INKNP1141A	M	A
INKNP1142A	M	A
INKNP1143A	M	A
INKNP1145A	M	A
INKNP1146A	U	U
INKNP1147A	U	U
INKNP1148A	U	U
INKNP1149A	M	A
INKNP1150A	U	U
INKNP1152A	U	U
INKNP1154A	M	A
INKNP1155A	M	A
INKNP1156A	M	J
INKNP1157A	F	U
INKNP1158A	M	A
INKNP1160A	F	U
INKNP1161A	F	A
INKNP1162A	F	U
INKNP1163A	M	A
INKNP1164A	M	A
INKNP1165A	F	U
INKNP1166A	U	U
INKNP1167A	M	J
INKNP1168A	M	A
INKNP1169A	M	A
INKNP1170A	M	A
INKNP1171A	F	U
INKNP1172A	F	U
INKNP1173A	M	A
INKNP1198A	M	A
INNLP0031A	F	A
INNLP0059A	F	A
INNLP0077A	F	U
INNLP0229A	M	A
INNLP0361A	M	A
INNLP0442A	M	A
INNLP0570A	F	U
