# Supplementary material for: Residency, movement patterns, behavior and demographics of reef manta rays in Komodo National Park
Source: PeerJ. 2022 May 16;10:e13302. doi: 10.7717/peerj.13302 (PMC9119296; doi:10.7717/peerj.13302)
Supplement: Supplemental Information 12 — Each survey day logged by a trained observer is listed according to the date, location, the time of the start of the survey (time), the duration of the survey (minutes), the number of individual manta rays identified (alfrediID), the number manta rays estimated on the encounter (alfrediEst) and the number of boats present at the site at the time of the survey. [file peerj-10-13302-s012.xls]

## Sheet: 20181103-KNPEnvLog_CORE_diced
date	site	time	duration	alfrediID	alfrediEst	boats
20130103	KM	-		3	20
20130103	KM	-		3	20
20130104	KM	-		1	10
20130105	KM	-		0	10
20130105	KM	-		0	18
20130112	KM	-		0	20
20130217	KM	-		0	5
20130217	KM	-		0	12
20130219	KM	-		2	20
20130306	KM	-		0	7
20130307	KM	-		0	5
20130309	KM	-		0	3
20130310	KM	-		0	3
20130310	KM	-		0	9
20130310	KM	-		0	6
20130317	KM	-		0	12
20130319	KM	1899-12-31 13:29:00		0	3	1
20130319	KM	-		0	10
20130320	KM	-		0	8
20130321	KM	-		5	7
20130322	KM	-		1	2
20130323	MA	-		0	3
20130324	KM	-		2	5
20130325	KM	1899-12-31 11:32:00		0	4	1
20130327	KM	-		1	6
20130328	KM	1899-12-31 09:38:00		0	13	1
20130329	KM	1899-12-31 09:55:00		0	20	1
20130330	MA	1899-12-31 11:32:00		0	6
20130330	MA	-		0	8
20130330	KM	-		8	8
20130401	KM	-		0	20
20130402	KM	-		0	6
20130403	KM	-		1	5
20130405	KM	1899-12-31 15:41:00		0	2	1
20130406	KM	1899-12-31 12:42:00		3	8
20130410	MA	1899-12-31 12:05:00		0	15	1
20130410	MA	1899-12-31 08:16:00		0	15	1
20130411	KM	1899-12-31 10:58:00		0	9
20130413	KM	-		0	20	1
20130415	KM	1899-12-31 10:01:00		0	0
20130416	KM	1899-12-31 12:13:00		0	0	1
20130418	MA	1899-12-31 07:10:00		0	12
20130419	KM	1899-12-31 14:24:00		0	0
20130420	KM	1899-12-31 11:09:00		0	0
20130422	KM	1899-12-31 10:16:00		0	0
20130422	KM	1899-12-31 12:16:00		0	0	1
20130423	KM	1899-12-31 12:17:00		1	3
20130423	MA	1899-12-31 09:30:00		0	6
20130425	KM	1899-12-31 12:40:00		0	6
20130426	KM	1899-12-31 12:32:00		2	1	1
20130428	KM	1899-12-31 12:01:00		0	7
20130428	KM	1899-12-31 14:30:00		0	10
20130429	KM	1899-12-31 14:11:00		1	18
20130429	KM	1899-12-31 11:30:00		1	40
20130430	KM	1899-12-31 07:51:00		0	1	1
20130502	KM	1899-12-31 11:37:00		0	2	1
20130503	KM	1899-12-31 15:14:00		0	22	1
20130503	KM	1899-12-31 14:00:00		0	1	1
20130511	KM	-		3	11
20130513	MA	1899-12-31 15:32:00		0	14	1
20130514	KM	-		3	10
20130516	KM	-		0	9
20130519	KM	-		0	1
20130521	MW	-		3	4
20130523	KM	-		0	5
20130524	MW	-		3	6
20130525	KM	1899-12-31 11:01:00		0	2	1
20130525	CL	-		0	0
20130528	MW	-		2	4
20130529	KM	-		1	10
20130531	MW	-		0	4
20130601	CL	-		0	0
20130602	KM	1899-12-31 12:44:00		0	20	1
20130602	KM	1899-12-31 11:47:00		0	4	1
20130602	KM	1899-12-31 13:38:00		0	0	1
20130604	KM			4	4
20130607	KM			4	4
20130609	KM			6	6
20130609	KM	1899-12-31 10:44:00		6	5	1
20130626	KM	1899-12-31 10:38:00		3	4	6
20130630	KM	1899-12-31 14:43:00		0	2	1
20130630	CL	1899-12-31 07:39:00		0	2	4
20130701	KM	-		0	0	3
20130704	CL	-		0	0	2
20130706	MW	1899-12-31 10:18:00		0	3	1
20130707	KM	-		0	0	8
20130709	CL	1899-12-31 13:49:00		0	0	2
20130710	KM	-		0	3	12
20130712	KM	1899-12-31 12:59:00		0	2	3
20130712	MW	1899-12-31 14:08:00		3	3	3
20130713	CL	1899-12-31 07:16:00		0	0	1
20130713	CL	-		0	0	2
20130714	KM	1899-12-31 10:51:00		0	1	3
20130721	KM	-		0	5	11
20130724	KM	1899-12-31 12:52:00		0	7	5
20130726	MW	1899-12-31 12:18:00		0	1	1
20130727	KM	1899-12-31 13:01:00		1	4	5
20130729	CL	-		0	0	3
20130729	KM	-		0	0	5
20130731	CL	-		0	0	2
20130731	CL	-		0	0	1
20130801	MW	-		0	0	1
20130801	KM	1899-12-31 14:31:00		0	0	3
20130803	KM	1899-12-31 12:24:00		0	0	4
20130805	KM	-		0	3	2
20130807	KM	-		0	3
20130807	KM	-		0	8
20130808	MW	1899-12-31 10:23:00		0	0	4
20130808	KM	1899-12-31 12:22:00		1	7	6
20130809	KM	-		0	4	1
20130810	KM	1899-12-31 12:22:00		0	9	10
20130811	MW	1899-12-31 11:34:00		0	3	1
20130812	KM	1899-12-31 12:09:00		0	0	14
20130813	MW	1899-12-31 12:04:00		0	0	1
20130816	KM	-		0	1	1
20130817	CL	1899-12-31 13:01:00		0	0	1
20130818	KM	1899-12-31 12:28:00		0	1	3
20130820	KM	-		0	1	1
20130824	MW	-		0	0	1
20130824	CL	-		0	0	2
20130825	KM	-		0	0	3
20130827	MW	1899-12-31 14:15:00		0	2	4
20130829	MW	-		0	0	1
20130904	KM	1899-12-31 14:02:00		0	0	1
20130904	MW	1899-12-31 10:10:00		0	0	2
20130905	CL	1899-12-31 14:11:00		0	0	1
20130905	KM	-		0	10
20130907	KM	-		0	10
20130908	CL	1899-12-31 16:08:00		0	0	1
20130911	KM	1899-12-31 11:17:00		0	7	3
20130919	KM	1899-12-31 11:27:00		0	3	3
20130920	KM	1899-12-31 15:19:00		0	0	3
20130921	MA	1899-12-31 07:34:00		5	4	2
20130921	MA	1899-12-31 14:28:00		5	7	1
20130922	CL	1899-12-31 13:26:00		0	1	1
20130923	MW			0	1	1
20130923	KM	1899-12-31 14:51:00		4	2	2
20130923	KM	1899-12-31 11:01:00		4	12	10
20130924	KM	1899-12-31 12:47:00		1	1	3
20130924	CL	1899-12-31 07:09:00		0	0	3
20130926	KM	1899-12-31 09:53:00		0	3	9
20130927	KM	1899-12-31 12:43:00		0	1	3
20130927	KM	1899-12-31 12:46:00		0	1	6
20130928	KM	-		0	8
20130929	KM	1899-12-31 10:19:00		0	0	8
20130929	KM	1899-12-31 12:27:00		0	0	5
20130929	KM	1899-12-31 14:25:00		0	0	3
20130929	KM	1899-12-31 09:06:00		0	7	1
20130929	KM	-		0	4
20130930	MW	1899-12-31 09:46:00		0	3	1
20131001	KM	1899-12-31 12:51:00		0	3	9
20131002	KM	1899-12-31 11:57:00		0	0	3
20131005	KM	1899-12-31 10:43:00		2	10	3
20131007	KM	1899-12-31 10:08:00		4	20	8
20131007	KM			4	30	6
20131008	KM			0	30
20131009	MW			0	9
20131009	KM	1899-12-31 12:49:00		5	12	4
20131010	KM	1899-12-31 14:20:00		2	10	3
20131010	MW	1899-12-31 12:12:00		4	12	1
20131014	KM	1899-12-31 15:35:00		0	0	3
20131014	MA	1899-12-31 07:24:00		13	20	1
20131014	MA	1899-12-31 10:45:00		13	20	2
20131023	KM	1899-12-31 15:49:00		0	3
20131028	KM	1899-12-31 10:41:00		0	6
20131102	CL	-		0	0	2
20131103	KM	-		0	0	2
20131103	KM	-		0	8	2
20131104	KM	1899-12-31 11:59:00		3	10	3
20131106	KM	1899-12-31 15:12:00		0	1	1
20131106	KM	-		0	3	1
20131106	KM	-		0	3	1
20131108	MW	-		0	2	1
20131108	MW	1899-12-31 09:30:00		0	2	1
20131108	MW	-		0	2
20131110	CL	-		0	0	1
20131110	CL	1899-12-31 07:03:00		0	0	1
20131119	MA	-		29	30	2
20131119	MA	1899-12-31 12:05:00		29	30	2
20131119	MA	-		29	15	1
20131119	MW	1899-12-31 14:15:00		0	3	1
20131119	MA	1899-12-31 14:54:00		29	20	2
20131119	MW	1899-12-31 14:15:00		0	3	1
20131121	CL	-		0	0	1
20131121	CL	1899-12-31 15:21:00		0	0	1
20131122	KM	1899-12-31 12:04:00		0	11	2
20131122	KM	1899-12-31 12:04:00		0	7	2
20131127	KM	1899-12-31 12:05:00		0	8	4
20131127	KM	1899-12-31 12:05:00		0	8	4
20131128	KM	1899-12-31 12:07:00		0	4	7
20131128	KM	-		0	10	5
20131129	MW	1899-12-31 16:45:00		0	5	1
20131129	KM	1899-12-31 11:52:00		0	6	2
20131129	KM	1899-12-31 11:52:00		0	6	2
20131130	CL	1899-12-31 10:49:00		0	0	3
20131201	KM	1899-12-31 07:36:00		2	34	1
20131202	KM	1899-12-31 10:00:00		0	16	2
20131202	KM	1899-12-31 10:00:00		0	16	2
20131203	KM	1899-12-31 09:53:00		0	18	3
20131203	KM	1899-12-31 09:53:00		0	18	3
20131204	KM	1899-12-31 11:40:00		2	3	3
20131204	KM	1899-12-31 11:40:00		2	3	3
20131204	KM	1899-12-31 14:57:00		2	10	5
20131207	KM	1899-12-31 12:13:00		2	12	9
20131209	MW	1899-12-31 11:32:00		0	6	2
20131209	MW	1899-12-31 12:00:00		0	6	1
20131209	MW	1899-12-31 12:00:00		0	6	1
20131211	MW	-		0	5	1
20131212	KM	1899-12-31 11:30:00		0	20	2
20131212	KM	1899-12-31 11:30:00		0	20	2
20131213	CL	-		0	1	2
20131215	MW	-		0	6	3
20131216	KM	1899-12-31 12:00:00		0	8	5
20131216	KM	1899-12-31 12:00:00		0	8	5
20131219	MW	-		3	7	3
20131222	MW	1899-12-31 12:30:00		8	6	2
20131228	MW	1899-12-31 10:35:00		0	3	1
20131229	MW	1899-12-31 10:11:00		3	3	2
20131229	MW	1899-12-31 10:15:00		3	3	2
20131229	MW	1899-12-31 10:15:00		3	3	2
20131230	MW	1899-12-31 10:15:00		2	3	2
20131230	MW	1899-12-31 10:15:00		2	3	2
20131231	KM	1899-12-31 10:30:00		0	7	3
20131231	KM	1899-12-31 10:30:00		0	7	3
20140105	MW	1899-12-31 16:07:00		0	4	1
20140107	KM	1899-12-31 13:21:00		8	5	9
20140109	KM	1899-12-31 10:09:00		31	7	4
20140111	MW	1899-12-31 10:02:00		0	0	2
20140111	KM	1899-12-31 12:30:00		1	5	4
20140116	MW	1899-12-31 09:52:00		0	0	1
20140218	KM	1899-12-31 12:29:00		0	5	4
20140224	KM	1899-12-31 11:39:00		0	6	5
20140224	MW	1899-12-31 13:46:00		0	6	1
20140228	KM	1899-12-31 11:21:00		0	12	2
20140228	MW	1899-12-31 13:22:00		0	0	1
20140311	MA	1899-12-31 07:24:00		18	0	3
20140311	MA	1899-12-31 10:23:00		18	0	2
20140312	KM	1899-12-31 07:21:00		2	0	1
20140316	KM	1899-12-31 10:35:00		1	0	5
20140317	MW	1899-12-31 09:54:00		0	0	1
20140323	KM	1899-12-31 10:53:00		0	1	9
20140331	KM	1899-12-31 10:27:00		0	8	4
20140403	KM	1899-12-31 12:38:00		3	12	5
20140404	KM	1899-12-31 11:07:00		0	6	2
20140405	KM	1899-12-31 10:46:00		0	10	2
20140405	CL	1899-12-31 14:08:00		0	0	1
20140410	KM	1899-12-31 13:49:00		0	0	4
20140411	KM	1899-12-31 10:24:00		0	0	5
20140411	KM	-		0	12	3
20140415	KM	1899-12-31 15:04:00		0	0	3
20140417	KM	1899-12-31 11:16:00		3	6	6
20140419	KM	1899-12-31 12:20:00		5	10	10
20140421	KM	1899-12-31 12:02:00		3	6	8
20140426	KM	1899-12-31 10:48:00		0	7	10
20140428	KM	1899-12-31 10:43:00		2	7	10
20140429	MW	1899-12-31 10:15:00		6	12	1
20140501	MW	1899-12-31 09:57:00		0	10	2
20140501	KM	1899-12-31 12:21:00		0	15	6
20140505	MW	1899-12-31 14:16:00		0	6	2
20140505	CL	1899-12-31 17:02:00		0	0	2
20140506	KM	1899-12-31 14:29:00		7	30	5
20140509	KM	1899-12-31 10:07:00		1	4	2
20140512	MW	1899-12-31 10:00:00		1	2	3
20140513	MW	1899-12-31 09:57:00		0	2	1
20140515	KM	1899-12-31 12:13:00		32	9	6
20140516	CL	1899-12-31 12:48:00		0	0	1
20140519	MW	1899-12-31 14:39:00		2	4	1
20140520	MA	1899-12-31 07:30:00		4	10	2
20140520	MA	1899-12-31 10:53:00		4	12	2
20140522	KM	1899-12-31 15:07:00		0	3	3
20140527	MW	1899-12-31 10:20:00		0	2	2
20140529	KM	1899-12-31 10:18:00		1	7	17
20140604	KM	1899-12-31 14:54:00		5	10	2
20140605	CL	1899-12-31 10:50:00		0	0	2
20140608	KM	1899-12-31 12:31:00		0	0	3
20140719	KM	1899-12-31 11:37:00		0	0	12
20140720	MW	1899-12-31 16:30:00		0	3	2
20140721	CL	1899-12-31 10:55:00		0	1	3
20140721	KM	1899-12-31 15:05:00		0	0	9
20140724	MW	1899-12-31 10:07:00		1	1	1
20140725	CL	1899-12-31 12:34:00		0	0	1
20140726	MW	1899-12-31 12:27:00		0	4	1
20140730	MW	1899-12-31 11:44:00		1	4	3
20140731	KM	1899-12-31 12:17:00		1	1	10
20140805	MW	1899-12-31 14:43:00		0	1	3
20140806	KM	1899-12-31 15:23:00		0	0	2
20140806	CL	1899-12-31 10:26:00		0	1	2
20140806	KM	1899-12-31 15:23:00		0	0	2
20140809	MW	1899-12-31 09:59:00		0	0	2
20140811	KM	1899-12-31 10:04:00		3	10	10
20140811	CL	1899-12-31 12:31:00		0	2	1
20140813	MW	1899-12-31 12:44:00		5	7	3
20140818	MW	1899-12-31 14:31:00		0	0	2
20140819	MA	1899-12-31 07:10:00		2	6	2
20140819	MA	1899-12-31 11:00:00		2	6	2
20140820	CL	1899-12-31 10:57:00		0	1	5
20140822	CL	-		0	6	2
20140827	KM	-		0	0	21
20140827	MW	-		1	1	3
20140903	MA	-		15	20	1
20140903	MA	-		15	10	1
20140904	MW	-		0	0	0
20140909	KM	-		0	4	3
20140910	MW	-		0	0	2
20140911	CL	-		6	6	1
20140912	KM	-		2	4	-
20140913	MW	-		0	0	4
20140916	KM	-		0	0	2
20140917	CL	-		0	0	3
20140922	KM	-		0	3	8
20140923	CL	-		0	2	2
20140930	MW	-		0	0	1
20141001	MW	-		0	1	3
20141002	KM	-		0	5	5
20141003	CL	-		0	1	5
20141006	MA	-		19	15	1
20141007	MA	-		6	10	3
20141008	CL	-		0	1	3
20141013	MW	-		8	10	1
20141017	MW	-		0	1	1
20141023	KM	1899-12-31 11:08:00		7	15	10
20141024	KM	1899-12-31 12:43:00		0	4	12
20141028	MW	1899-12-31 14:32:00		0	5	2
20141029	MA	1899-12-31 08:06:00		12	20	3
20141029	MA	1899-12-31 11:36:00		12	5	4
20141029	KM	1899-12-31 15:44:00		0	2	1
20141031	CL	1899-12-31 09:30:00		0	1	1
20141104	KM	-		1	5	1
20141104	MA	-		1	30	1
20141105	MA	-		12	15	2
20141106	MW	-		0	0	2
20141124	MW	1899-12-31 15:12:00		0	2	1
20141125	MA	1899-12-31 11:06:00		18	15	3
20141125	MA	1899-12-31 14:35:00		18	10	2
20141126	MA	1899-12-31 07:29:00		1	8	1
20141126	MA	1899-12-31 10:57:00		1	6	2
20141127	KM	1899-12-31 15:03:00		0	2	4
20141128	KM	1899-12-31 13:39:00		0	15	2
20141128	MW	1899-12-31 14:25:00		0	3	1
20141129	CL	1899-12-31 06:38:00		0	0	1
20141203	KM	1899-12-31 11:36:00		0	6	3
20141204	MW	1899-12-31 10:03:00		0	10	4
20141205	KM	1899-12-31 10:25:00		6	15	4
20141206	KM	1899-12-31 10:14:00		4	6	4
20150228	KM			3	3
20150304	KM			12	11
20150311	KM			6	6
20150326	CL	1899-12-31 06:51:00		0	1	2
20150326	KM	1899-12-31 14:12:00		18	21	5
20150327	MW	1899-12-31 14:25:00		0	0	2
20150328	KM	1899-12-31 10:13:00		3	5	5
20150409	MW	1899-12-31 12:42:00		4	4	4
20150411	MW	1899-12-31 14:17:00		0	0	2
20150413	MA	1899-12-31 07:21:00		28	20	-
20150413	MA	1899-12-31 10:24:00		28	20	-
20150415	CL	1899-12-31 10:00:00		0	0	1
20150422	MW			18	21
20150423	MW			11	11
20150501	MW	1899-12-31 07:35:00		0	1	2
20150501	CL	1899-12-31 14:24:00		0	0	5
20150502	KM	1899-12-31 10:59:00		12	20	14
20150503	KM	1899-12-31 11:18:00		9	20	14
20150512	KM	1899-12-31 10:29:00		1	27	5
20150514	MA	1899-12-31 08:30:00		38	15	2
20150514	MA	1899-12-31 13:00:00		38	14	1
20150515	CL	-		0	1	1
20150520	MW	-		15	8	2
20150521	MA	-		26	10	1
20150521	MA	-		26	5	2
20150522	KM	-		0	12	1
20150522	CL	-		0	0	1
20151103	KM	1899-12-31 12:03:00		9	10	6
20151104	KM	1899-12-31 14:42:00		18	20	2
20151104	KM	1899-12-31 14:51:00		18	4	4
20151113	KM	1899-12-31 09:40:00		1	12	6
20151113	MW	1899-12-31 14:09:00		2	2	4
20151116	MW	1899-12-31 13:10:00		2	4	2
20151116	KM	1899-12-31 16:35:00		5	0	3
20151117	CL	1899-12-31 06:40:00		0	0	1
20151118	KM	1899-12-31 13:36:00		0	15	5
20151120	KM	snorkel		0	1	1
20151120	MW	1899-12-31 07:06:00		0	1	1
20160412	KM	1899-12-31 14:30:00	61	7	20	3
20160414	KM	1899-12-31 16:21:00	62	4	5	1
20160415	CL	1899-12-31 10:05:00	68	0	0	2
20160419	KM	1899-12-31 10:37:00	59	9	6	4
20160421	MW	1899-12-31 09:56:00	63	1	2	3
20160422	CL	1899-12-31 14:10:00	58	0	1	3
20160510	KM	1899-12-31 11:26:00	66	10	10	4
20160512	MA			4	3	1
20160512	MA			4	6	1
20160514	CL			0	1	1
20160710	KM	1899-12-31 08:00:00	60	52	28
20160710	KM	1899-12-31 11:50:00	60	52	13
20160710	KM	1899-12-31 14:15:00	60	52	100
20160711	MA	1899-12-31 08:15:00	60	10	16
20160711	MA	1899-12-31 11:05:00	60	10	9
20160713	KM	1899-12-31 08:15:00	60	23	20
20160713	KM	1899-12-31 15:00:00	45	23	16
20160718	CL	1899-12-31 11:56:00	54	0	0	4
20160718	KM	1899-12-31 08:24:00	82	2	4	20+
20160718	KM	1899-12-31 12:04:00	70	2	8	20+
20160719	CL	1899-12-31 14:39:00	70	0	0	4
20160720	KM	1899-12-31 11:40:00	79	6	13	17
20160723	MA	1899-12-31 08:21:00	64	24	24	1
20160723	MA	1899-12-31 11:37:00	59	24	28	1
20160801	MA	1899-12-31 12:30:00	63	0	11
20160801	MA	1899-12-31 12:30:00	63	0	11	2
20160820	KM	1899-12-31 11:47:00	58	7	12	15
20160822	KM	1899-12-31 11:20:00	55	5	10	20
20160829	KM	1899-12-31 12:24:00	60	0	1	12
20160901	KM	1899-12-31 13:55:00	60	0	0	10
20160905	MW	1899-12-31 14:01:00	59	4	4	3
20160905	KM	1899-12-31 11:38:00	53	2	5	9
20160914	MA	1899-12-31 11:20:00	50	37	15	1
20160914	MA	1899-12-31 14:10:00	57	37	20	1
20160915	KM	1899-12-31 11:25:00	65	5	5	12
20160916	CL	1899-12-31 06:09:00	59	3	4	1
20160917	CL	1899-12-31 06:15:00	62	2	2	1
20160920	KM	1899-12-31 12:05:00	61	0	11	11
20160929	KM	1899-12-31 10:18:00	59	3	2	7
20160929	MW	1899-12-31 12:19:00	59	0	0	2
20161004	MW	1899-12-31 11:55:00	58	5	4	3
20161004	MA	1899-12-31 10:11:00	60	23	16	2
20161004	MA	-	62	23	16	1
20161005	KM	1899-12-31 15:19:00	61	0	0	12
20161006	MW	1899-12-31 14:02:00	63	0	4	1
20161007	CL	1899-12-31 06:21:00	61	0	1	1
20161008	MW	1899-12-31 13:43:00	61	6	11	4
20161009	KM	1899-12-31 14:13:00	60	7	8	7
20161010	CL	1899-12-31 09:01:00	64	0	1	2
20161011	MA	1899-12-31 10:34:00	60	10	5	3
20161011	MA	1899-12-31 13:39:00	60	10	13	1
20161014	MW	1899-12-31 06:49:00	28	0	0	1
20161014	CL	1899-12-31 13:56:00	59	0	0	3
20161018	KM	1899-12-31 09:54:00	50	9	15	10
20161018	MW	1899-12-31 13:58:00	59	3	5	1
20161019	MW	1899-12-31 12:51:00	60	8	8	2
20161019	MA	1899-12-31 10:53:00	63	18	10	1
20161019	MA	1899-12-31 13:43:00	68	18	10	2
20161020	CL	1899-12-31 15:56:00	58	0	0	1
20161022	KM	1899-12-31 14:28:00	58	8	12	3
20161025	KM	1899-12-31 11:49:00	57	6	8	12
20161026	MA	1899-12-31 10:52:00	68	12	7	1
20161026	MA	1899-12-31 13:49:00	66	12	12	1
20161028	KM	1899-12-31 08:57:00	67	0	9	2
20161028	CL	1899-12-31 14:04:00	58	0	0	3
20161028	CL	1899-12-31 13:33:00	61	0	1	6
20161029	MW	1899-12-31 12:22:00	57	0	1	5
20161029	MW	1899-12-31 08:55:00	44	0	2	4
20161030	KM	1899-12-31 11:28:00	71	6	10	14
20161030	MW	1899-12-31 14:25:00	44	0	1	3
20161031	CL	1899-12-31 13:50:00	61	1	2	3
20161031	MW	1899-12-31 11:08:00	64	5	7	3
20161103	KM	1899-12-31 11:30:00	66	17	20	7
20161108	KM	1899-12-31 12:01:00	75	1	9	5
20161108	MW	1899-12-31 14:38:00	56	1	6	4
20161111	KM	1899-12-31 10:59:00	62	1	4	16
20161115	KM	1899-12-31 11:04:00	61	4	7	14
20161115	MW	1899-12-31 13:12:00	57	5	9	4
20161121	MW	1899-12-31 13:13:00	56	0	0	4
20161124	KM	1899-12-31 13:28:00	63	2	8	6
20161124	CL	1899-12-31 11:29:00	54	0	0	2
20161128	KM	1899-12-31 09:46:00	60	7	40	10
20161128	MW	1899-12-31 11:48:00	46	0	4	3
20161201	KM	1899-12-31 12:02:00	61	8	11	12
20161201	MW	1899-12-31 14:23:00	57	9	12	3
20161206	MW	1899-12-31 11:12:00	55	8	10	5
20161208	MW	1899-12-31 14:38:00	63	3	3	2
20161209	MW	1899-12-31 14:23:00	62	3	3	1
20161212	KM			3	3
20161213	MW	1899-12-31 11:29:00	62	1	1	3
20161217	KM	1899-12-31 12:00:00	59	3	8	5
20161220	KM	1899-12-31 13:29:00	55	1	2	5
20170107	MW	1899-12-31 13:18:00	53	8	9	2
20170109	KM	1899-12-31 12:01:00	53	3	4	8
20170112	KM	1899-12-31 12:02:00	58	0	4	6
20170119	MW	1899-12-31 09:35:00	58	8	9	2
20170121	MW	1899-12-31 13:04:00	60	3	0	1
20170123	KM	1899-12-31 11:04:00	69	9	15	3
20170126	MW	1899-12-31 11:08:00	54	0	3	8
20170130	KM	1899-12-31 12:09:00	52	7	15	3
20170130	MW	1899-12-31 11:05:00	61	6	9	7
20170131	KM	1899-12-31 11:01:00	52	6	30	3
20170201	MW	1899-12-31 11:06:00	57	14	16	4
20170202	MW	1899-12-31 12:09:00	57	6	6	2
20170203	KM	1899-12-31 14:03:00	62	1	8	3
20170204	KM	1899-12-31 12:36:00		6	13	2
20170205	KM	1899-12-31 12:06:00	59	0	4	1
20170211	KM	1899-12-31 11:01:00	57	1	1	4
20170213	MW	1899-12-31 14:07:00	52	2	3	2
20170213	KM	1899-12-31 12:08:00	51	0	1	3
20170214	MW	1899-12-31 14:07:00	63	3	4	4
20170214	KM	1899-12-31 12:08:00	52	0	1	4
20170216	KM	1899-12-31 13:05:00	59	2	3	3
20170218	MW	1899-12-31 13:04:00	63	5	6	3
20170218	KM	1899-12-31 11:01:00	55	0	2	5
20170223	KM	1899-12-31 12:01:00	64	0	0	1
20170225	CL	1899-12-31 13:04:00	52	0	0	2
20170225	MW	1899-12-31 11:03:00	52	12	12	8
20170226	MW	1899-12-31 11:01:00	55	0	2	3
20170301	MW	1899-12-31 11:06:00	53	17	19	5
20170302	MW	1899-12-31 11:09:00	60	20	20	6
20170306	MW	1899-12-31 11:03:00	58	4	6	5
20170307	MW	1899-12-31 11:07:00	66	0	0	3
20170308	MW	1899-12-31 11:01:00	65	4	4	2
20170309	KM	1899-12-31 11:04:00	63	0	2	3
20170309	MW	1899-12-31 09:43:00	65	0	1	3
20170311	MW	1899-12-31 09:21:00	51	0	0	2
20170314	MW	1899-12-31 11:09:00	63	2	3	6
20170320	MW	1899-12-31 12:01:00	56	0	0	3
20170327	KM	1899-12-31 11:03:00	65	6	8	17
20170328	CL	1899-12-31 13:03:00	42	0	0	4
20170328	MW	1899-12-31 08:09:00	67	3	3	1
20170331	MW	1899-12-31 14:09:00	57	1	6	2
20170404	MW	1899-12-31 14:01:00	55	4	7	2
20170406	MW	1899-12-31 09:17:00	53	0	0	1
20170407	KM	1899-12-31 11:05:00	58	13	13	10
20170408	MW	1899-12-31 08:50:00	56	2	4	2
20170410	KM	1899-12-31 15:05:00	44	16	16	2
20170411	KM	1899-12-31 10:16:00	72	12	23	18
20170412	MW	1899-12-31 13:58:00	69	8	15	4
20170412	CL	1899-12-31 06:21:00	60	0	4	1
20170413	MA	1899-12-31 14:38:00	50	0	4	1
20170413	KM	1899-12-31 13:04:00	63	13	14	6
20170413	MA	1899-12-31 10:05:00	48	0	1	1
20170418	KM	1899-12-31 14:52:00	71	5	22	10
20170419	MW	1899-12-31 16:03:00	54	0	8	2
20170421	CL	1899-12-31 09:15:00	58	0	0	1
20170422	MW	1899-12-31 10:55:00	55	0	0	2
20170426	MW	1899-12-31 12:01:00	67	8	7	4
20170426	MA	1899-12-31 10:06:00	54	9	14	1
20170427	KM	1899-12-31 10:34:00	74	14	15	13
20170428	CL	1899-12-31 14:54:00	57	0	1	1
20170428	CL	1899-12-31 13:12:00	52	0	0	1
20170429	MW	1899-12-31 14:31:00	79	22	20	2
20170429	CL	1899-12-31 14:21:00	48	0	0	1
20170515	KM	1899-12-31 12:02:00	61	3	4	16
20170516	MW	1899-12-31 12:00:00	64	6	6	3
20170518	CL	1899-12-31 10:34:00	55	4	4	2
20170520	MW	1899-12-31 15:02:00	61	1	1	2
20170522	MW	1899-12-31 14:28:00	62	0	0	2
20170522	KM	1899-12-31 13:53:00	56	2	3	1
20170523	CL	1899-12-31 11:55:00	65	1	1	3
20170523	KM	1899-12-31 11:00:00	64	0	0	2
20170524	MW	1899-12-31 14:07:00	58	1	1	1
20170525	MW	1899-12-31 14:03:00	56	20	21	4
20170526	MW	1899-12-31 11:11:00	65	4	4	1
20170527	KM	1899-12-31 11:42:00	56	2	3	13
20170601	KM	1899-12-31 15:14:00	63	3	10	5
20170603	KM	1899-12-31 11:05:00	62	0	0	7
20170605	MW	1899-12-31 12:37:00	49	0	0	1
20170610	MW	1899-12-31 12:28:00	57	8	8	4
20170611	CL	1899-12-31 14:00:00	49	1	1	5
20170612	KM	1899-12-31 14:24:00	61	4	3	4
20170613	MW	1899-12-31 11:26:00	59	4	6	4
20170617	MW	1899-12-31 12:55:00	63	10	12	2
20170620	KM	1899-12-31 11:34:00	54	0	1	5
20170622	MW	1899-12-31 09:53:00	61	2	3	5
20170703	MW	1899-12-31 14:05:00	62	0	1	4
20170705	MW	1899-12-31 11:44:00	63	0	0	3
20170707	KM	1899-12-31 10:05:00	65	1	1	13
20170708	KM	1899-12-31 11:45:00	53	0	2	12
20170711	KM	1899-12-31 13:38:00	63	0	2	13
20170711	KM	1899-12-31 11:23:00	55	0	3	17
20170712	KM	1899-12-31 12:40:00	60	0	4	10
20170712	MW	1899-12-31 11:27:00	65	4	5	9
20170720	KM	1899-12-31 13:23:00	57	0	3	11
20170722	KM	1899-12-31 12:07:00	59	0	2	10
20170726	KM	1899-12-31 11:40:00	55	0	1	13
20170727	MW	1899-12-31 12:00:00	55	0	2	10
20170801	KM	1899-12-31 14:07:00	65	0	0	11
20170803	CL	1899-12-31 10:15:00	54	0	0	3
20170807	KM	1899-12-31 11:45:00	63	0	8	22
20170817	CL	1899-12-31 10:31:00	40	8	1	5
20170818	MA	1899-12-31 17:13:00	25	36	2	2
20170818	MA	1899-12-31 13:23:00	44	36	15	2
20170818	MA	1899-12-31 10:27:00	45	36	30	3
20170819	MA	1899-12-31 13:59:00	50	54	8	1
20170819	MA	1899-12-31 11:42:00	48	54	20	1
20170819	MA	1899-12-31 12:43:00	46	54	20	1
20170822	CL	1899-12-31 17:03:00	44	0	0	10
20170822	CL	1899-12-31 14:52:00	51	0	0	9
20170823	CL	1899-12-31 14:35:00	57	1	4	14
20170825	MA	1899-12-31 12:00:00	55	21	10	3
20170825	MA	1899-12-31 09:18:00	39	21	10	1
20170826	MW	1899-12-31 14:24:00	61	3	6	3
20170831	KM	1899-12-31 11:45:00	69	0	0	8
20170902	CL	1899-12-31 12:23:00	52	2	2	3
20170904	CL	1899-12-31 13:53:00	62	3	5	4
20170905	KM	1899-12-31 10:03:00	58	2	4	11
20170914	CL	1899-12-31 09:23:00	65	1	1	2
20170915	MW	1899-12-31 08:57:00	63	0	0	1
20170916	KM	1899-12-31 14:57:00	60	0	0	8
20170916	CL	1899-12-31 09:39:00	54	0	1	1
20170918	MW	1899-12-31 11:44:00	68	1	1	6
20170919	CL	1899-12-31 14:10:00	52	0	3	2
20170921	CL	1899-12-31 11:15:00	56	0	3	1
20170921	CL	1899-12-31 07:50:00	62	0	2	1
20170922	KM	1899-12-31 14:55:00	55	5	0	2
20170922	KM	1899-12-31 11:11:00	64	5	2	8
20170925	KM	1899-12-31 14:08:00	65	1	2	14
20170925	MA	1899-12-31 10:48:00	50	18	15	2
20170925	MA	1899-12-31 07:57:00	58	18	15	2
20170926	MW	1899-12-31 14:27:00	59	0	1	4
20170927	CL	1899-12-31 07:43:00	71	0	2	4
20171002	KM	1899-12-31 11:34:00	65	0	0	19
20171005	MW	1899-12-31 11:54:00	52	0	1	5
20171007	KM	1899-12-31 11:08:00	61	2	4	14
20171011	MW	1899-12-31 11:45:00	64	7	7	4
20171012	KM	1899-12-31 14:12:00	64	3	5	12
20171017	KM	1899-12-31 14:19:00	63	3	2	3
20171026	KM	1899-12-31 13:46:00	55	11	14	4
20171030	MW	1899-12-31 15:11:00	80	1	1	2
20171030	CL	1899-12-31 09:43:00	59	0	0	4
20171101	MW	1899-12-31 14:07:00	61	0	0	2
20171101	KM	1899-12-31 13:15:00	61	3	10	5
20171102	KM	1899-12-31 11:39:00	56	21	12	9
20171102	KM	1899-12-31 11:35:00	55	21	15	7
20171104	MW	1899-12-31 11:30:00	53	3	8	4
20171104	KM	1899-12-31 09:00:00	61	0	60	8
20171107	MW	1899-12-31 11:41:00	61	6	8	4
20171108	MW	1899-12-31 13:29:00	54	0	1	5
20171108	KM	1899-12-31 11:15:00	65	4	4	8
20171109	KM	1899-12-31 11:47:00	59	14	18	6
20171111	KM	1899-12-31 11:37:00	57	3	6	6
20171114	MW	1899-12-31 11:37:00	57	3	3	4
20171115	KM	1899-12-31 11:28:00	61	1	3	9
20171118	KM	1899-12-31 11:45:00	57	8	11	12
20171122	KM	1899-12-31 13:33:00	59	6	9	8
20171125	KM	1899-12-31 11:39:00	65	9	14	6
20171128	KM	1899-12-31 12:26:00	51	6	0	6
20171129	KM	1899-12-31 14:11:00	55	2	6	2
20171201	MW	1899-12-31 11:50:00	65	10	10	2
20171201	KM	1899-12-31 15:54:00	57	3	9	4
20171202	MW	1899-12-31 11:42:00	62	6	8	2
20171204	KM	1899-12-31 11:16:00	69	9	11	6
20171205	MW	1899-12-31 09:48:00	63	3	4	2
20171206	MW	1899-12-31 13:43:00	59	4	4	1
20171208	KM	1899-12-31 14:16:00	66	3	7	6
20171209	MW	1899-12-31 12:59:00	59	5	5
20171209	KM	1899-12-31 11:39:00	55	13	14	6
20171215	KM	1899-12-31 11:21:00	63	0	5	7
20180109	KM	1899-12-31 13:09:00	60	4	10	6
20180113	KM	1899-12-31 11:55:00	57	2	5	7
20180115	MW	1899-12-31 13:59:00	52	0	0	3
20180115	KM	1899-12-31 11:47:00	61	4	5	8
20180120	KM	1899-12-31 14:17:00	62	0	1	3
20180201	MW	1899-12-31 14:22:00	62	1	1	6
20180224	MW	1899-12-31 13:58:00	65	0	1	2
20180227	KM	1899-12-31 11:27:00	73	4	4	4
20180302	MW	1899-12-31 12:09:00	62	12	13	4
20180306	KM	1899-12-31 14:14:00	65	10	10	2
20180308	KM	1899-12-31 11:46:00	58	4	5	3
20180310	MW	1899-12-31 14:43:00	58	0	1	3
20180310	KM	1899-12-31 12:20:00	58	4	6	12
20180312	MW	1899-12-31 09:07:00	63	0	0	2
20180314	MW	1899-12-31 10:48:00	60	0	0
20180316	CL	1899-12-31 13:44:00	60	0	0
20180317	MW	1899-12-31 11:21:00	54	0	0
20180320	MW	1899-12-31 14:17:00	51	4		3
20180320	KM	1899-12-31 12:09:00	47	2		6
20180321	KM	1899-12-31 12:13:00	62	1	7	7
20180324	KM	1899-12-31 10:46:00	61	6	6	6
20180326	MW	1899-12-31 12:46:00	34	4	7	13
20180328	MW	1899-12-31 11:42:00	63	3	2	8
20180329	MW	1899-12-31 10:10:00	60	0	2	7
20180330	CL	1899-12-31 13:52:00	51	1	1	4
20180331	KM	1899-12-31 11:40:00	62	10	21	19
