# Supplementary material for: Residency, movement patterns, behavior and demographics of reef manta rays in Komodo National Park
Source: PeerJ. 2022 May 16;10:e13302. doi: 10.7717/peerj.13302 (PMC9119296; doi:10.7717/peerj.13302)
Supplement: Supplemental Information 13 — Demographic and behavioral (beh) data are displayed by date, site and according to the individual’s identification code. [file peerj-10-13302-s013.xlsx]

## Sheet: Sheet1
Date	ID	Site	Sex (M/F/U)	Mat	Preg	Beh
20130103	INKNP0104A	KM	F	U	U	U
20130103	INKNP0450A	KM	F	U	U	U
20130103	INKNP0451A	KM	M	U	U	U
20130104	INKNP0449A	KM	F	U	U	Cl
20130109	INKNP0083A	KM	F	U	U	U
20130120	INKNP0001A	KM	F	A	N	Cl
20130120	INKNP0170A	KM	M	A	-	U
20130126	INKNP0064A	KM	F	U	U	U
20130126	INKNP0187A	KM	U	U	U	Cl
20130126	INKNP0188A	KM	F	U	U	U
20130215	INKNP0439A	KM	F	U	U	Cr
20130217	INKNP0196A	KM	F	U	U	Cr
20130217	INKNP0449A	KM	F	A	U	Cl
20130217	INKNP0522A	KM	F	U	U	Cr
20130217	INKNP0525A	KM	M	A	-	Cl
20130219	INKNP0452A	KM	F	U	U	Cl
20130219	INKNP0454A	KM	M	A	-	Cr
20130303	INKNP0002A	KM	M	A	-	Cl
20130304	INKNP0056A	KM	F	U	U	Cr
20130316	INKNP0306A	KM	M	U	U	F
20130524	INKNP0030A	MW	M	J	-	U
20130321	INKNP0004A	KM	F	U	U	U
20130321	INKNP0005A	KM	F	U	U	U
20130321	INKNP0006A	KM	F	U	U	U
20130321	INKNP0009A	KM	M	A	-	U
20130321	INKNP0025A	KM	M	A	-	U
20130321	INKNP0039A	KM	F	U	U	U
20130321	INKNP0040A	KM	F	U	U	U
20130321	INKNP0041A	KM	F	U	U	Cr
20130321	INKNP0051A	KM	F	U	U	U
20130322	INKNP0042A	KM	M	A	-	U
20130324	INKNP0044A	KM	F	U	U	U
20130324	INNLP0059A	KM	F	A		U
20130327	INKNP0003A	KM	F	U	U	U
20130327	INKNP0043A	KM	M	A	U	U
20130327	INKNP0045A	KM	M	A	-	U
20130330	INKNP0046A	KM	F	U	U	U
20130330	INKNP0047A	KM	F	U	U	U
20130330	INKNP0048A	KM	M	A	-	U
20130330	INKNP0049A	KM	F	U	U	U
20130330	INKNP0050A	KM	F	U	U	U
20130330	INKNP0052A	KM	M	A	-	U
20130330	INKNP0053A	KM	M	A	-	Cl
20130330	INKNP0055A	KM	F	U	U	U
20130401	INKNP0013A	MA	F	U	U	U
20130401	INKNP0094A	MA	F	U	U	Cr
20140503	INKNP0030A	MW	M	SA	-	Cl
20130401	INKNP0150A	MA	F	U	U	U
20130401	INKNP0151A	MA	F	U	U	Cr
20130401	INKNP0152A	MA	F	U	U	Cr
20130401	INKNP0153A	MA	M	A	-	U
20130401	INKNP0154A	MA	F	U	U	U
20130401	INKNP0155A	MA	F	U	U	U
20130401	INKNP0156A	MA	F	U	U	Cr
20130403	INNLP0031A	KM	F	U	U	U
20130406	INKNP0010A	KM	F	U	U	U
20130406	INKNP0058A	KM	M	A	-	U
20130406	INKNP0059A	KM	M	A	-	U
20130410	INKNP0013A	KM	F	U	U	Cl
20130410	INKNP0371A	KM	F	U	U	U
20130411	INKNP0468A	KM	U	U	U	Cr
20130524	INKNP0031A	MW	M	J	-	U
20130418	INKNP0300A	KM	F	U	U	U
20130423	INKNP0054A	KM	F	U	U	U
20130425	INKNP0082A	KM	F	U	U	Cl
20130426	INKNP0006A	KM	F	U	U	U
20130426	INKNP0065A	KM	F	U	U	U
20130426	INKNP0070A	KM	M	U	U	U
20130428	INKNP0382A	KM	F	U	U	U
20130429	INKNP0064A	KM	F	A	Y	Cr
20130503	INKNP0061A	KM	F	U	U	U
20140604	INKNP0043A	KM	M	J	-	U
20130503	INKNP0310A	KM	F	U	U	Cr
20130503	INKNP0420A	KM	M	U	U	Cr
20130505	INKNP0003A	KM	F	U	U	U
20130503	INKNP0062A	KM	M	SA	-	Cr
20130505	INKNP0291A	KM	F	U	U	U
20130508	INKNP0069A	KM	U	U	U	Cl
20130511	INKNP0008A	KM	F	U	U	U
20130511	INKNP0011A	KM	M	A	-	U
20130511	INKNP0012A	KM	F	U	U	U
20130512	INKNP0090A	KM	F	U	U	U
20130512	INKNP0091A	KM	M	A	-	U
20130512	INKNP0092A	KM	M	A	-	Cl
20130512	INKNP0093A	KM	F	U	U	U
20130512	INKNP0168A	KM	F	U	U	U
20130512	INKNP0169A	KM	M	A		Cl
20130512	INKNP0170A	KM	M	A	-	U
20130513	INKNP0172A	MW	F	U	U	U
20130514	INKNP0021A	KM	F	U	U	Cl
20130514	INKNP0022A	KM	F	A	U	Cl
20130514	INKNP0023A	KM	M	A	-	Cl
20130515	INKNP0010A	KM	F	U	U	U
20130515	INKNP0093A	KM	F	U	U	Cl
20130515	INKNP0094A	KM	F	U	U	Cl
20130515	INKNP0095A	KM	F	U	U	Cl
20130515	INKNP0096A	KM	F	U	U	Cl
20130515	INKNP0101A	KM	M	A	-	Cl
20130521	INKNP0026A	MW	U	U	U	Cl
20130521	INKNP0027A	MW	F	U	U	Cl
20130521	INKNP0029A	MW	U	U	U	U
20130522	INKNP0080A	KM	M	A	-	Cr
20131014	INKNP0062A	MA	M	SA	U	Cr
20140708	INKNP0062A	MA	M	SA	-	U
20130524	INKNP0032A	MW	M	A	-	U
20130524	INKNP0074A	MW	M	A	-	Cl
20130524	INKNP0075A	MW	F	U	U	Cl
20130528	INKNP0033A	MW	M	A	-	Cl
20130528	INKNP0034A	MW	F	U	U	Cl
20130529	INKNP0035A	KM	U	U	U	Cl
20130601	INKNP0076A	KM	F	U	U	U
20130601	INKNP0077A	KM	M	A	-	U
20130601	INKNP0078A	KM	M	A	-	U
20130604	INKNP0004A	KM	F	U	U	U
20130604	INKNP0010A	KM	F	U	U	U
20130604	INKNP0071A	KM	M	A	-	U
20130604	INKNP0072A	KM	F	U	U	U
20130604	INKNP0079A	KM	F	U	U	Cl
20130604	INKNP0080A	KM	M	A	-	Cl
20130607	INKNP0024A	KM	F	U	U	Cl
20130607	INKNP0081A	KM	F	U	U	U
20130607	INKNP0082A	KM	F	U	U	U
20130607	INKNP0083A	KM	F	U	U	U
20130609	INKNP0067A	KM	F	U	U	Cr
20130609	INKNP0084A	KM	F	U	U	U
20130609	INKNP0085A	KM	F	U	U	U
20130609	INKNP0086A	KM	M	U	U	U
20130609	INKNP0087A	KM	F	U	U	U
20130609	INKNP0088A	KM	M	A	-	U
20130609	INKNP0089A	KM	M	U	U	U
20130610	INKNP0090A	MA	F	U	U	Cl
20130610	INKNP0110A	MA	F	U	U	Cl
20130610	INKNP0163A	MA	F	U	U	Cl
20130610	INKNP0164A	MA	F	U	U	Cl
20130610	INKNP0170A	MA	M	A		Cr
20130610	INKNP0245A	MA	M	A	-	Cl
20130610	INKNP0263A	MA	F	U	U	Cl
20130610	INKNP0265A	MA	F	U	U	Cl
20130610	INKNP0266A	MA	F	U	U	U
20130610	INKNP0267A	MA	F	U	U	Cl
20130610	INNLP0229A	MA	M	A		Cr
20130611	INKNP0165A	KM	F	U	U	U
20130611	INKNP0472A	KM	M	A	-	Cl
20130505	INKNP0063A	KM	M	SA	-	U
20130624	INKNP0260A	KM	M	A	-	Cl
20130626	INKNP0117A	KM	M	A	-	Cr
20130626	INKNP0124A	KM	U	U	U	Cr
20130626	INKNP0154A	KM	F	U	U	Cl
20130629	INKNP0094A	CL	F	U	U	U
20130629	INKNP0280A	KM	M	A	-	Cl
20130629	INKNP0286A	CL	M	A	-	U
20130706	INKNP0246A	MW	F	U	U	Cl
20140805	INKNP0111A	MA	U	J	U	Cr
20130706	INKNP0276A	MW	F	U	U	U
20130706	INKNP0295A	MW	U	U	U	Cl
20130709	INKNP0161A	KM	F	U	U	Cr
20130709	INKNP0162A	KM	F	U	U	Cl
20130711	INKNP0023A	KM	M	A	-	Cr
20130711	INKNP0292A	KM	M	A	-	Cr
20141029	INKNP0111A	MA	U	J	-	Cr
20130712	INKNP0071A	MW	M	A	-	Cr
20130712	INKNP0099A	MW	F	U	U	Cr
20130712	INKNP0100A	MW	M	A	-	Cr
20130714	INKNP0100A	MW	M	A	-	Cl
20130714	INKNP0294A	MW	M	A	-	U
20130722	INKNP0159A	KM	F	U	U	Cl
20130724	INKNP0024A	KM	F	U	U	U
20130724	INKNP0084A	KM	F	U	U	U
20130724	INKNP0179A	KM	M	A	U	U
20130724	INKNP0180A	KM	F	U	U	U
20130724	INKNP0181A	KM	F	U	U	U
20130724	INKNP0182A	KM	M	U	U	Cr
20130724	INKNP0231A	KM	F	U	U	Cr
20130725	INKNP0024A	KM	F	U	U	U
20130725	INKNP0056A	KM	F	A	U	U
20130725	INKNP0122A	KM	M	A	-	U
20130725	INKNP0183A	KM	M	A	-	Cr
20130725	INKNP0184A	KM	F	U	U	Cl
20130725	INKNP0185A	KM	F	A	U	U
20130725	INKNP0186A	KM	F	A	U	U
20130727	INKNP0021A	KM	F	U	U	Cr
20130727	INKNP0159A	KM	F	A	U	Cl
20130802	INKNP0310A	KM	F	U	U	Cl
20130802	INKNP0349A	KM	M	U	U	Cl
20171205	INKNP0111A	MW	U	J	-	Cl
20130802	INKNP0436A	KM	F	U	U	Cl
20130802	INKNP1055A	KM	F	U	U	Cl
20130802	INKNP1101A	KM	F	U	U	Cl
20130802	INKNP1113A	KM	F	U	U	Cl
20130807	INKNP0041A	KM	F	U	U	Cl
20130807	INKNP0157A	KM	M	U	U	Cr
20130808	INKNP0120A	KM	M	A	-	Cl
20130808	INKNP0159A	KM	F	A	U	U
20130808	INKNP0207A	KM	M	A	U	Cl
20130808	INKNP0278A	KM	F	U	U	Cl
20130808	INKNP0279A	KM	M	A	-	U
20130808	INKNP0280A	KM	M	A	-	Cl
20130812	INKNP0109A	MW	M	U	U	Cr
20130812	INKNP0190A	MW	M	U	U	U
20130814	INKNP0140A	KM	M	A	-	Cl
20130814	INKNP0173A	MW	M	A	-	Cl
20130814	INKNP0174A	MW	M	A	-	Cl
20130823	INKNP0021A	MW	F	U	U	Cr
20130823	INKNP0160A	MW	F	U	U	Cr
20130823	INKNP0268A	MW	M	A	-	Cr
20130823	INKNP0294A	MW	M	A	-	Cr
20130823	INKNP0527A	MW	F	U	U	Cl
20130823	INKNP0529A	MW	M	A	-	Cr
20130829	INKNP0432A	MA	M	A	-	Cr
20130829	INKNP0496A	MA	M	A	-	Cr
20130908	INKNP0160A	CL	F	U	U	U
20130911	INKNP0166A	KM	M	A	-	Cl
20130911	INKNP0167A	KM	F	A	U	U
20130917	INKNP0016A	MA	F	A	U	Cr
20130917	INKNP0024A	KM	F	U	U	Cr
20130917	INKNP0056A	MA	F	A	Y	U
20130917	INKNP0063A	MA	M	A	-	U
20130917	INKNP0077A	MA	M	A	-	U
20130917	INKNP0081A	MA	F	U	U	Cr
20130917	INKNP0113A	MA	F	U	U	U
20130917	INKNP0115A	MA	F	U	U	U
20130917	INKNP0119A	MA	F	U	U	U
20130917	INKNP0148A	MA	F	U	U	Cl
20130917	INKNP0153A	MA	M	A	-	Cl
20130917	INKNP0154A	MA	F	U	U	Cl
20130917	INKNP0184A	MA	F	A	U	Cr
20130917	INKNP0245A	MA	M	A	-	Cr
20130917	INKNP0272A	MA	M	A	-	U
20130917	INKNP0321A	MA	M	A	-	Cr
20130917	INKNP0368A	MA	F	U	U	Cr
20130917	INKNP0650A	MA	M	A	-	U
20130917	INKNP0678A	MA	F	U	U	U
20130918	INKNP0056A	MA	F	A	U	Cr
20130918	INKNP0076A	MA	F	U	U	Cl
20130918	INKNP0083A	MA	F	U	U	U
20130918	INKNP0097A	MA	M	A	U	Cr
20130918	INKNP0109A	MA	M	A	U	Cr
20130918	INKNP0113A	MA	F	U	U	Cl
20130918	INKNP0119A	MA	F	A	Y	U
20130918	INKNP0120A	MA	M	A	-	U
20130918	INKNP0142A	MA	F	U	U	Cl
20130918	INKNP0146A	MA	F	U	U	U
20130918	INKNP0153A	MA	M	A	U	Cl
20130918	INKNP0201A	MA	M	A	-	Co
20130918	INKNP0245A	MA	M	A	-	U
20130918	INKNP0271A	MA	M	A	-	Cr
20130918	INKNP0281A	MA	M	A	-	U
20130918	INKNP0282A	MA	F	U	U	Cl
20130918	INKNP0283A	MA	U	U	U	Cr
20130918	INKNP0284A	MA	F	U	U	Cr
20130921	INKNP0016A	MA	F	A	U	Cl
20130921	INKNP0109A	MA	M	A	U	U
20130921	INKNP0111A	MA	U	U	U	U
20130921	INKNP0112A	MA	F	U	U	U
20130921	INKNP0119A	MA	F	A	U	Cr
20130921	INKNP0120A	MA	M	A	U	U
20130921	INKNP0139A	MA	F	U		U
20130921	INKNP0142A	MA	F	U	U	U
20130922	INKNP0176A	KM	M	A	U	Cl
20130922	INKNP0177A	KM	M	U	U	Cr
20130922	INKNP0178A	KM	F	U	U	Cl
20130923	INKNP0024A	KM	F	U	U	Cl
20130923	INKNP0121A	KM	F	A	Y	Co
20130923	INKNP0122A	KM	M	A	-	Co
20130923	INKNP0133A	KM	F	U	U	Cr
20130924	INKNP0122A	KM	M	A	-	Cr
20130926	INKNP0123A	KM	F	U	N	Cl
20130926	INKNP0189A	MW	M	A	-	Cl
20130927	INKNP0009A	MA	M	A	-	U
20130927	INKNP0013A	MA	F	U	U	U
20130927	INKNP0097A	MA	M	A	-	U
20130927	INKNP0133A	KM	F	U		U
20130927	INKNP0272A	MA	M	A	-	U
20130927	INKNP0283A	MA	U	U	U	U
20130927	INKNP0503A	MA	M	A	-	U
20130927	INKNP0607A	MA	F	U	U	U
20130927	INKNP0629A	MA	M	A	-	U
20130927	INKNP0680A	MA	M	A	-	U
20130928	INKNP0180A	KM	F	U	U	U
20130928	INKNP0433A	KM	F	U	U	U
20131001	INKNP0124A	KM	M	A	-	U
20131001	INKNP0153A	MA	M	A	-	Cr
20131001	INKNP0354A	MA	F	U	U	Cr
20131001	INKNP0503A	MA	M	A	U	Cl
20131005	INKNP0122A	KM	M	A	-	U
20131005	INKNP0125A	KM	M	A	-	U
20131005	INKNP0128A	KM	M	A		Cr
20131006	INKNP0122A	KM	M	A	-	Cr
20131006	INKNP0277A	KM	M	A	-	Cl
20131006	INKNP0342A	KM	M	A	-	U
20131006	INKNP0343A	KM	M	A	-	Cr
20131006	INKNP0344A	KM	M	U	U	U
20131006	INKNP0345A	KM	M	A	-	Cr
20131007	INKNP0105A	KM	M	A	-	U
20131007	INKNP0117A	KM	M	A	-	U
20131007	INKNP0126A	KM	F	U	U	U
20131007	INKNP0127A	KM	M	A	-	U
20131009	INKNP0001A	KM	F	A	U	U
20131009	INKNP0026A	KM	M	A	-	U
20131009	INKNP0128A	KM	M	A	-	U
20131009	INKNP0134A	KM	F	U	U	U
20131009	INKNP0135A	KM	F	U	U	U
20131010	INKNP0083A	KM	F	U	U	U
20131010	INKNP0098A	KM	M	A	-	U
20131010	INKNP0104A	KM	F	U	U	U
20131010	INKNP0108A	MW	M	U	U	U
20131010	INKNP0129A	KM	M	A	-	U
20131010	INKNP0129A	MW	M	A	U	U
20131010	INKNP0137A	KM	M	A	-	U
20131010	INKNP0138A	MW	M	A	-	U
20131010	INKNP0138A	MW	M	A		U
20131010	INKNP0212A	KM	F	U	U	U
20131010	INKNP0231A	KM	F	U	U	U
20131010	INKNP0347A	KM	M	A	-	U
20131014	INKNP0009A	MA	M	A	U	U
20131014	INKNP0013A	MA	F	U	U	Cr
20141125	INKNP0118A	MA	M	J	-	U
20131014	INKNP0079A	MA	F	U	U	U
20131014	INKNP0097A	MA	M	A	-	Cl
20131014	INKNP0110A	MA	F	U	U	Cl
20131014	INKNP0111A	MA	U	U	U	F
20131014	INKNP0112A	MA	F	U	U	Cr
20131014	INKNP0113A	MA	F	U	U	U
20131014	INKNP0114A	MA	F	U	U	U
20131014	INKNP0115A	MA	F	U	U	Cr
20131014	INKNP0118A	MA	M	U	U	U
20131014	INKNP0131A	MA	F	U	U	U
20131014	INKNP0139A	MA	F	U	U	Cl
20131014	INKNP0140A	MA	M	A	-	U
20131014	INKNP0141A	MA	M	U	U	U
20131014	INKNP0145A	MA	M	A	-	Cr
20131014	INKNP0146A	MA	F	U	U	Cr
20131014	INKNP0147A	MA	F	U	U	Cl
20131016	INKNP0358A	KM	F	U	U	Cr
20131021	INKNP0484A	MA	M	A	-	Cr
20131102	INKNP0353A	KM	M	A	-	Cr
20131104	INKNP0001A	KM	F	A	U	Cr
20131104	INKNP0223A	KM	F	U	U	U
20131104	INKNP0224A	KM	M	A	-	U
20131104	INKNP0296A	KM	M	U	U	U
20140108	INKNP0130A	KM	M	J	-	F
20131109	INKNP0225A	MA	M	A		U
20131113	INKNP0276A	MW	F	U		U
20131114	INKNP0056A	MA	F	A	U	U
20131114	INKNP0109A	MA	M	A	U	U
20131114	INKNP0148A	MA	F	U	U	U
20131114	INKNP0352A	MA	F	U	U	U
20131114	INKNP0354A	MA	F	U	U	U
20131115	INKNP0259A	MW	U	U	U	U
20131119	INKNP0038A	MA	F	U	U	U
20131119	INKNP0068A	MA	F	U	U	U
20131119	INKNP0072A	MA	F	U	U	U
20131119	INKNP0094A	MA	F	U	U	U
20131119	INKNP0102A	MA	M	U	U	U
20131119	INKNP0111A	MA	U	U	U	Cr
20131119	INKNP0113A	MA	F	U	U	U
20131119	INKNP0126A	MA	F	U	U	U
20131119	INKNP0151A	MA	F	U	U	U
20131119	INKNP0155A	MA	F	U	U	U
20131119	INKNP0168A	MA	F	U	U	U
20131119	INKNP0201A	MA	M	A	-	Co
20131119	INKNP0226A	MA	F	U	U	U
20131119	INKNP0227A	MA	F	U	U	U
20131119	INKNP0228A	MA	M	A	-	U
20131119	INKNP0229A	MA	M	U	U	U
20131119	INKNP0230A	MA	M	A	-	U
20131119	INKNP0231A	MA	F	U	U	U
20131119	INKNP0232A	MA	F	U	U	U
20131119	INKNP0233A	MA	M	A	-	U
20131119	INKNP0234A	MA	M	A	-	U
20131119	INKNP0235A	MA	M	A	-	U
20131119	INKNP0236A	MA	M	A	-	U
20140727	INKNP0136A	KM	M	J	U	U
20131119	INKNP0238A	MA	M	A	-	U
20131119	INKNP0241A	MA	F	U	U	U
20131119	INKNP0242A	MA	M	A	-	U
20131119	INKNP0243A	MA	M	A	-	Cl
20131119	INKNP0244A	MA	M	U	U	U
20131119	INKNP0245A	MA	M	A	-	U
20131119	INKNP0246A	MA	F	U	U	U
20131119	INKNP0247A	MA	M	A	-	U
20131119	INKNP0248A	MA	U	U	U	U
20131119	INKNP0249A	MA	M	U	U	U
20131119	INKNP0250A	MA	F	U	U	U
20131119	INKNP0251A	MA	F	U	U	U
20131119	INKNP0252A	MA	F	U	U	Cr
20131119	INNLP0361A	MA	M	U	U	U
20131122	INKNP0010A	MW	F	U	U	U
20131124	INKNP0025A	KM	M	A	U	U
20131124	INKNP0150A	KM	F	U	U	U
20150512	INKNP0136A	KM	M	J	-	Cr
20131124	INKNP0297A	KM	M	A	-	F
20131124	INKNP0348A	KM	M	A	-	U
20131126	INKNP0025A	KM	M	A	-	U
20131126	INKNP0028A	KM	F	U	U	U
20131126	INKNP0085A	KM	F	U	U	U
20131126	INKNP0279A	KM	M	A	-	U
20131126	INKNP0350A	KM	U	U	U	U
20131129	INKNP0276A	MW	F	U	U	U
20131130	INKNP0065A	MW	F	U	U	U
20131130	INKNP0069A	MW	U	U	U	U
20131130	INKNP0104A	MW	F	U	U	U
20131130	INKNP0151A	MW	F	U	U	U
20131130	INKNP0180A	MW	F	U	U	U
20131130	INKNP0223A	KM	F	U	U	U
20131130	INKNP0272A	KM	M	A	-	Cl
20131130	INKNP0273A	KM	F	U	U	Cl
20131130	INKNP0274A	MW	F	U	U	Cl
20131130	INKNP0275A	MW	U	U	U	Cl
20131201	INKNP0047A	KM	F	U	U	U
20131201	INKNP0297A	KM	M	A	-	U
20131201	INKNP0298A	KM	M	A	-	U
20131201	INKNP0299A	KM	F	U	U	U
20131202	INKNP0082A	KM	F	A	U	U
20131204	INKNP0065A	KM	F	U	U	U
20131204	INKNP0123A	KM	F	U	U	U
20131204	INKNP0271A	KM	M	A	-	Cl
20131207	INKNP0180A	KM	F	U	U	U
20131207	INKNP0430A	KM	F	U	U	U
20131209	INKNP0102A	KM	M	A	-	U
20160915	INKNP0136A	KM	M	SA	-	Cl
20131210	INKNP0117A	KM	M	A	U	Cr
20131212	INKNP0041A	KM	F	U	U	U
20131212	INKNP0068A	KM	F	U	U	U
20131212	INKNP0123A	KM	F	U	U	U
20131212	INKNP0137A	KM	M	A	-	U
20131212	INKNP0179A	KM	M	A	-	U
20131212	INKNP0290A	KM	M	A	-	Cl
20131212	INKNP0356A	KM	F	U	U	Cr
20131212	INKNP0357A	KM	F	U	U	Cr
20170306	INKNP0136A	MW	M	SA	-	Cl
20131212	INKNP0361A	KM	F	U	U	U
20131212	INKNP0362A	KM	F	U	U	Cr
20131212	INKNP0366A	KM	F	U	U	Cr
20131212	INKNP0367A	KM	F	U	U	U
20131212	INKNP0368A	KM	F	U	U	Cr
20131213	INKNP0276A	MW	F	U		U
20131214	INKNP0119A	MA	F	A	U	U
20131219	INKNP0138A	MW	M	A	-	U
20131219	INKNP0289A	MW	U	U	U	Cl
20131219	INKNP0530A	MW	F	A	Y	Cl
20131219	INKNP0532A	MW	M	A	-	Cl
20131219	INKNP0533A	MW	U	U	U	U
20131220	INKNP0209A	MW	F	U	U	U
20131222	INKNP0018A	MW	F	U	U	U
20131222	INKNP0164A	MW	F	U	U	U
20131222	INKNP0254A	MW	U	U	U	U
20131222	INKNP0255A	MW	M	A	-	U
20131222	INKNP0256A	MW	M	A	-	U
20131222	INKNP0257A	MW	F	A	U	Cl
20170410	INKNP0136A	KM	M	SA	U	Cl
20131222	INKNP0709A	MW	F	U	U	U
20131224	INKNP0364A	KM	M	U	U	U
20131229	INKNP0099A	MW	F	U	U	U
20131229	INKNP0147A	MW	F	U	U	U
20131229	INKNP0194A	MW	F	U	U	Cl
20131229	INKNP0216A	MW	F	U	U	U
20131229	INKNP0285A	MW	M	A	-	U
20131230	INKNP0285A	MW	M	A	-	U
20131231	INKNP0137A	KM	M	A	-	U
20140102	INKNP0088A	KM	M	A	-	Cl
20140102	INKNP0246A	KM	F	U	U	U
20140102	INKNP0287A	MW	F	A	U	Cl
20140102	INKNP0288A	MW	M	A	-	U
20140103	INKNP0013A	KM	F	U	U	U
20140103	INKNP0221A	KM	F	U	U	U
20140105	INKNP0082A	KM	F	A	U	U
20140107	INKNP0012A	KM	F	U	U	U
20140107	INKNP0019A	KM	F	U	U	U
20140107	INKNP0133A	KM	F	U	U	F
20140107	INKNP0180A	KM	F	U	U	U
20140107	INKNP0269A	KM	M	U	U	U
20140107	INKNP0270A	KM	F	U	U	U
20140107	INKNP0418A	KM	F	U	U	F
20140107	INKNP0419A	KM	M	A	-	U
20140107	INKNP0506A	KM	M	A	-	F
20140107	INKNP0509A	KM	F	U	U	F
20140108	INKNP0081A	KM	F	U	U	F
20140108	INKNP0082A	KM	F	A	U	F
20140108	INKNP0083A	KM	F	U	U	F
20170418	INKNP0136A	KM	M	SA	U	F
20140108	INKNP0148A	KM	F	U	U	F
20140108	INKNP0151A	KM	F	U	U	F
20140108	INKNP0161A	KM	F	U	U	F
20140108	INKNP0180A	KM	F	U	U	F
20140108	INKNP0224A	KM	M	A	-	F
20140108	INKNP0233A	KM	M	A	-	F
20140108	INKNP0252A	KM	F	U	U	F
20130401	INKNP0149A	MA	M	SA	-	Cr
20131119	INKNP0237A	MA	M	J	-	U
20140108	INKNP0278A	KM	F	U	U	F
20140108	INKNP0307A	KM	M	A	-	F
20140108	INKNP0308A	KM	F	A	U	F
20140108	INKNP0309A	KM	F	U	U	F
20140108	INKNP0310A	KM	F	A	Y	F
20140108	INKNP0311A	KM	F	U	U	F
20140520	INKNP0237A	MA	M	J	-	F
20140108	INKNP0313A	KM	F	U	U	F
20140108	INKNP0314A	KM	F	U	U	F
20140108	INKNP0316A	KM	F	U	U	F
20140108	INKNP0317A	KM	M	A	-	F
20140108	INKNP0318A	KM	F	U	U	F
20140108	INKNP0319A	KM	F	U	U	F
20140108	INKNP0320A	KM	U	U	U	F
20140108	INKNP0321A	KM	M	A	-	F
20140108	INKNP0322A	KM	M	A	-	F
20140108	INKNP0323A	KM	M	A	-	F
20140109	INKNP0021A	KM	F	U	U	F
20140109	INKNP0059A	KM	F	A	U	F
20140109	INKNP0061A	KM	F	U	U	F
20140109	INKNP0071A	KM	M	A	-	F
20140109	INKNP0074A	KM	M	A	-	Cl
20140109	INKNP0079A	KM	F	U	U	U
20140109	INKNP0081A	KM	F	U	U	F
20140109	INKNP0083A	KM	F	U	U	F
20140109	INKNP0137A	KM	M	A	-	Cr
20140109	INKNP0148A	KM	F	U	U	F
20140109	INKNP0149A	KM	M	A	-	F
20140109	INKNP0180A	KM	F	U	U	F
20140109	INKNP0243A	KM	M	A	-	F
20140109	INKNP0244A	KM	M	A	-	U
20140109	INKNP0247A	KM	M	A	-	U
20140109	INKNP0252A	KM	F	U	U	F
20140109	INKNP0258A	KM	M	U	-	F
20140109	INKNP0305A	KM	F	U	U	F
20140109	INKNP0306A	KM	M	U	U	F
20140109	INKNP0311A	KM	F	U	U	F
20140109	INKNP0317A	KM	M	A	-	F
20140109	INKNP0324A	KM	M	A	-	Cr
20140109	INKNP0325A	KM	F	U	U	F
20140109	INKNP0326A	KM	F	U	U	F
20140109	INKNP0327A	KM	F	U	U	F
20140109	INKNP0328A	KM	F	U	U	F
20131222	INKNP0258A	MW	M	SA	-	U
20140109	INKNP0330A	KM	F	U	U	F
20140109	INKNP0331A	KM	F	A	U	F
20140109	INKNP0332A	KM	F	U	U	F
20140109	INKNP0333A	KM	F	U	U	F
20140109	INKNP0334A	KM	F	U	U	F
20140109	INKNP0335A	KM	F	U	U	F
20140109	INKNP0336A	KM	F	U	U	F
20140109	INKNP0337A	KM	F	U	U	F
20140109	INKNP0457A	MW	U	U	U	U
20140109	INNLP0059A	KM	F	A		F
20140110	INKNP0107A	KM	F	U	U	U
20140110	INKNP0133A	KM	F	U	U	U
20140110	INKNP0192A	KM	F	U	U	U
20140111	INKNP0202A	KM	F	U	U	Cl
20140113	INKNP0222A	KM	M	A		U
20140113	INKNP0369A	KM	U	U	U	U
20140115	INKNP0154A	KM	F	U	U	U
20140115	INKNP0252A	KM	F	U	U	U
20140115	INKNP0370A	KM	F	A	U	U
20140119	INKNP0154A	MW	F	U	U	U
20140122	INKNP0031A	KM	M	U	U	U
20140122	INKNP0256A	KM	M	A	-	U
20140122	INKNP0464A	KM	F	U	U	U
20140122	INKNP0475A	KM	M	A	-	U
20140205	INKNP0111A	MA	U	U	U	Cr
20140206	INKNP0392A	MA	F	U	U	U
20140208	INKNP0081A	KM	F	U	U	U
20140208	INKNP0142A	KM	F	U	U	U
20140208	INKNP0477A	KM	F	U	U	U
20140311	INKNP0084A	MA	F	U	U	U
20140311	INKNP0104A	MA	F	U	U	U
20140311	INKNP0109A	MA	M	A	U	U
20140311	INKNP0115A	MA	F	U	U	U
20140311	INKNP0136A	CL	M	J	U	U
20140311	INKNP0148A	MA	F	U	U	U
20140311	INKNP0150A	MA	F	U	U	U
20140311	INKNP0163A	MA	F	U	U	U
20140311	INKNP0164A	MA	F	U	U	U
20140311	INKNP0243A	KM	M	A	-	U
20140311	INKNP0314A	MA	F	U	U	U
20140311	INKNP0319A	MA	F	U	U	U
20140311	INKNP0392A	MA	F	U	U	U
20140311	INKNP0397A	MA	F	U	U	U
20140311	INKNP0412A	KM	F	U	U	U
20140311	INKNP0482A	MA	M	U	U	U
20140311	INKNP0500A	MA	F	A	Y	U
20140108	INKNP0258A	KM	M	SA	-	F
20140311	INKNP0541A	MA	F	U	U	U
20140311	INKNP0542A	MA	F	U	U	U
20140311	INKNP0543A	MA	M	A	-	U
20140311	INKNP0544A	MA	F	U	U	U
20140311	INKNP0547A	MA	M	A	-	Cl
20140311	INKNP0548A	MA	F	U	U	U
20140311	INKNP0555A	MA	M	A	-	U
20140312	INKNP0051A	KM	F	U	U	U
20140312	INKNP0231A	KM	F	U	U	U
20140313	INKNP0124A	KM	M	A	-	U
20140314	INKNP0142A	KM	F	U	U	F
20140314	INKNP0556A	KM	M	A	-	Cl
20130706	INKNP0262A	MW	M	SA	-	Cl
20140314	INKNP0558A	KM	M	A	-	U
20140315	INKNP0505A	MW	F	U	U	U
20140316	INKNP0041A	KM	F	U	U	U
20140316	INKNP0394A	KM	M	U	U	U
20140317	INKNP0276A	MW	F	U	U	U
20140319	INKNP0076A	MA	F	U	U	U
20140319	INKNP0314A	MA	F	U	U	U
20140319	INKNP0559A	MA	U	U	U	U
20140330	INKNP0276A	KM	F	U	U	U
20140403	INKNP0001A	KM	F	A	U	U
20140403	INKNP0012A	KM	F	U	U	U
20140403	INKNP0100A	KM	M	A	U	U
20140403	INKNP0121A	KM	F	A	U	U
20140403	INKNP0178A	KM	F	A	U	U
20140403	INKNP0368A	KM	F	U	U	U
20140403	INKNP0372A	KM	M	U	U	U
20140403	INKNP0373A	KM	F	U	U	U
20140403	INKNP0375A	KM	M	A	-	U
20140403	INKNP0376A	KM	F	U	U	Cl
20140403	INKNP0445A	KM	F	U	U	Cr
20140403	INKNP0560A	KM	F	U	U	U
20140403	INKNP0561A	KM	F	U	U	Cl
20140405	INKNP0298A	KM	M	A	-	Cl
20140405	INKNP0360A	KM	M	U	U	U
20140405	INKNP0370A	KM	F	A	U	U
20140405	INKNP0377A	KM	M	A	-	U
20140405	INKNP0378A	KM	F	U	U	U
20140407	INKNP0185A	KM	F	A	U	Cr
20140408	INKNP0320A	KM	U	U	U	U
20140408	INKNP0552A	KM	M	A	-	U
20140408	INKNP0563A	KM	M	A	-	U
20140408	INKNP0564A	KM	F	U	U	U
20140413	INKNP0228A	MA	M	A	-	Cr
20140413	INKNP0754A	MA	F	U	U	U
20140414	INKNP0221A	KM	F	U	U	Cl
20140414	INKNP0244A	KM	M	A	-	Cr
20140415	INKNP0038A	MA	F	U	U	U
20140415	INKNP0039A	MA	F	U	U	U
20140415	INKNP0063A	MA	M	A	-	U
20140415	INKNP0110A	MA	F	U	U	U
20140415	INKNP0163A	MA	F	U	U	U
20140415	INKNP0213A	MA	M	A	-	U
20140415	INKNP0244A	MA	M	A	-	U
20140415	INKNP0270A	MA	F	U	U	U
20140415	INKNP0279A	MA	M	A	U	Cl
20140415	INKNP0330A	MA	F	U	U	U
20140415	INKNP0354A	MA	F	U	U	U
20140415	INKNP0367A	MA	F	U	U	U
20140415	INKNP0379A	MA	F	U	U	U
20140415	INKNP0380A	MA	M	A	-	U
20140108	INKNP0262A	KM	M	SA	-	F
20140415	INKNP0383A	MA	F	U	U	U
20140415	INKNP0384A	MA	M	A	-	U
20140415	INKNP0385A	MA	M	A	U	Cl
20140415	INKNP0386A	MA	F	U	U	U
20140415	INKNP0387A	MA	F	U	U	U
20140415	INKNP0391A	MA	M	A	-	U
20140415	INKNP0392A	MA	F	U	U	U
20140415	INKNP0393A	MA	F	U	U	U
20140415	INKNP0395A	MA	M	A	-	U
20140415	INKNP0396A	MA	F	U	U	U
20140415	INKNP0397A	MA	F	U	U	U
20140415	INKNP0770A	MA	F	U	U	U
20140417	INKNP0008A	KM	F	U	U	Cl
20140417	INKNP0099A	KM	F	U	U	Cl
20140417	INKNP0406A	KM	M	A	-	Cl
20140417	INKNP0565A	KM	M	A	-	U
20140419	INKNP0026A	KM	M	A	-	U
20140419	INKNP0049A	KM	F	U	U	U
20140419	INKNP0065A	KM	F	A	U	Cl
20140419	INKNP0338A	KM	M	A	-	Cl
20140419	INKNP0370A	KM	F	A		U
20140419	INKNP0410A	KM	M	A	-	Cl
20140419	INKNP0411A	KM	M	A	-	Cl
20140419	INKNP0567A	KM	M	A	-	U
20140420	INKNP0065A	KM	F	A	U	U
20140420	INKNP0180A	KM	F	U	U	Co
20140420	INKNP0182A	KM	M	A	-	Co
20140420	INKNP0186A	KM	F	A	U	U
20140420	INKNP0382A	KM	F	U	U	Co
20140420	INKNP0413A	KM	M	A	-	Co
20140420	INKNP0461A	KM	M	A	-	Co
20140420	INKNP0462A	KM	F	U	U	Co
20140420	INKNP0466A	KM	M	A	-	U
20140420	INKNP0467A	KM	M	A	-	Co
20140421	INKNP0204A	KM	F	U	U	U
20140421	INKNP0576A	KM	M	U	U	U
20130622	INKNP0292A	KM	M	SA	-	Cl
20140421	INKNP0578A	KM	U	U	U	Cl
20140424	INKNP0389A	KM	M	A	-	U
20140427	INKNP0416A	KM	F	U	U	U
20140428	INKNP0003A	KM	F	U	U	U
20140428	INKNP0129A	KM	M	A	-	Cl
20140428	INKNP0182A	KM	M	A	-	Cl
20140428	INKNP0203A	KM	F	A	U	Cl
20140428	INKNP0579A	KM	F	A	U	Cl
20140429	INKNP0008A	KM	F	U	U	U
20140429	INKNP0058A	KM	M	A	-	Cl
20140429	INKNP0134A	MW	F	U	U	U
20140429	INKNP0137A	KM	M	A	-	U
20140429	INKNP0292A	KM	M	A	-	U
20130711	INKNP0293A	KM	M	SA	-	Cr
20140429	INKNP0398A	KM	M	A	-	U
20140429	INKNP0401A	KM	F	U	U	U
20140429	INKNP0402A	KM	F	A	U	U
20131124	INKNP0293A	KM	M	SA	-	U
20140429	INKNP0581A	MW	F	U	U	Cl
20140429	INKNP0582A	MW	F	U	U	U
20140429	INKNP0583A	MW	F	U	U	U
20140429	INKNP0584A	MW	F	U	U	Cl
20140429	INKNP0585A	MW	M	A	-	Cl
20140429	INKNP0586A	MW	M	A	-	Cl
20140429	INKNP0587A	MW	M	A	-	U
20140430	INKNP0382A	KM	F	U	U	U
20140501	INKNP0032A	MW	M	A	-	U
20140501	INKNP0125A	MW	M	A	-	Cr
20140501	INKNP0179A	MW	M	A	-	Cr
20140501	INKNP0363A	KM	F	U	U	Cl
20140108	INKNP0312A	KM	M	J	-	F
20140502	INKNP0084A	KM	F	U	U	U
20140502	INKNP0185A	KM	F	A	U	Cr
20140502	INKNP0291A	KM	F	A	U	Cl
20140502	INKNP0374A	KM	F	U	U	U
20140502	INKNP0379A	KM	F	U	U	Cl
20151120	INKNP0312A	KM	M	J	-	U
20140503	INKNP0399A	KM	U	U	U	Cr
20140503	INKNP0588A	MW	F	U	U	Cr
20140504	INKNP0220A	KM	M	A	-	U
20140504	INKNP0428A	KM	M	U	U	U
20140504	INKNP0507A	KM	M	A	-	U
20140505	INKNP0039A	KM	F	U	U	Cl
20140505	INKNP0086A	MW	M	A	-	Cl
20140505	INKNP0094A	KM	F	U	U	Cl
20140505	INKNP0141A	KM	M	U	U	U
20140505	INKNP0154A	MW	F	U	U	U
20140505	INKNP0291A	KM	F	A	U	Cl
20140505	INKNP0404A	MW	M	A	-	U
20140505	INKNP0410A	MW	M	A		Cr
20140505	INKNP0463A	KM	M	A	-	Cr
20140506	INKNP0061A	KM	F	U	U	U
20140506	INKNP0072A	KM	F	U	U	U
20140506	INKNP0076A	KM	F	U	U	Cl
20140506	INKNP0081A	KM	F	U	U	U
20140506	INKNP0197A	KM	M	U	U	U
20140506	INKNP0204A	KM	F	A	U	U
20140506	INKNP0252A	KM	F	U	U	F
20140506	INKNP0342A	KM	M	A	-	F
20140506	INKNP0371A	KM	F	U	U	F
20140506	INKNP0398A	KM	M	A	-	U
20140506	INKNP0405A	KM	F	U	U	U
20140506	INKNP0416A	KM	F	U	U	U
20140506	INKNP0462A	KM	F	U		Cr
20140506	INKNP0596A	KM	M	A	-	U
20140507	INKNP0306A	MW	M	U	U	U
20160620	INKNP0312A	MA	M	SA	-	U
20140507	INKNP0445A	MW	F	U	U	Cl
20140507	INKNP0464A	MW	F	U	U	Cl
20140509	INKNP0380A	KM	M	A	-	U
20170412	INKNP0312A	MW	M	SA	-	Cl
20170418	INKNP0312A	KM	M	SA	U	F
20140511	INKNP0205A	KM	M	A	-	Co
20140511	INKNP0213A	KM	M	A	-	Co
20140511	INKNP0363A	KM	F	U	U	Co
20140511	INKNP0484A	KM	M	A	-	Co
20140512	INKNP0088A	MW	M	A	-	Cr
20140512	INKNP0205A	MW	M	A	-	U
20140514	INKNP0185A	KM	F	A	U	Cr
20140514	INKNP0223A	KM	F	U	U	U
20140514	INKNP0244A	KM	M	A	-	U
20140514	INKNP0407A	KM	F	U	U	U
20140515	INKNP0081A	KM	F	U	U	F
20140515	INKNP0082A	KM	F	A	U	U
20140515	INKNP0094A	KM	F	U	U	U
20140515	INKNP0103A	KM	M	A	-	U
20140515	INKNP0124A	KM	M	A	-	U
20140515	INKNP0169A	KM	M	A	-	U
20140515	INKNP0180A	KM	F	U	U	U
20140515	INKNP0185A	KM	F	A	U	U
20140515	INKNP0195A	KM	M	A	-	U
20140515	INKNP0214A	KM	M	A	-	U
20140515	INKNP0235A	KM	M	A		U
20140515	INKNP0241A	KM	F	U	U	U
20140515	INKNP0244A	KM	M	A		U
20140515	INKNP0247A	KM	M	A	-	U
20140515	INKNP0252A	KM	F	U	U	Cr
20140515	INKNP0269A	KM	M	A	-	U
20140515	INKNP0276A	KM	F	U	U	U
20140515	INKNP0291A	KM	F	A	U	U
20140515	INKNP0306A	KM	M	U	U	U
20140515	INKNP0321A	KM	M	A	-	U
20140515	INKNP0325A	KM	F	U	U	Cr
20140515	INKNP0356A	KM	F	U	U	U
20140515	INKNP0371A	KM	F	U	U	U
20140515	INKNP0410A	KM	M	A	-	U
20140515	INKNP0418A	KM	F	U	U	U
20140515	INKNP0439A	KM	F	U	U	U
20140515	INKNP0513A	KM	M	A	-	U
20140515	INKNP0514A	KM	M	A	-	U
20170426	INKNP0312A	MA	M	SA	-	Cl
20140515	INKNP0518A	KM	M	A	-	U
20140515	INKNP0519A	KM	F	U	U	U
20140515	INKNP0521A	KM	F	U	U	U
20140515	INKNP0545A	KM	M	A	-	Cl
20140515	INKNP0554A	KM	F	A	Y	Cl
20140515	INKNP0605A	KM	F	U	U	Cl
20140516	INKNP0008A	KM	F	U	U	U
20140516	INKNP0084A	KM	F	U	U	U
20140516	INKNP0180A	KM	F	U	U	U
20140516	INKNP0241A	KM	F	A	U	U
20140516	INKNP0399A	KM	U	U	U	U
20150413	INKNP0315A	MA	M	J	-	U
20140517	INKNP0006A	KM	F	U	U	U
20140517	INKNP0028A	KM	F	U	U	U
20140517	INKNP0082A	KM	F	A	U	U
20140517	INKNP0094A	KM	F	U	U	U
20140517	INKNP0133A	KM	F	U	U	Cl
20140517	INKNP0180A	KM	F	A	U	U
20140517	INKNP0198A	KM	F	U	U	Cl
20140517	INKNP0201A	KM	M	A	-	U
20140517	INKNP0213A	KM	M	A	-	U
20140517	INKNP0273A	KM	F	U	U	U
20140517	INKNP0302A	KM	F	U	U	U
20140517	INKNP0351A	KM	M	A	-	U
20140517	INKNP0405A	KM	F	U	U	U
20140517	INKNP0406A	KM	M	A	-	U
20140517	INKNP0412A	KM	F	U	U	U
20140517	INKNP0420A	KM	M	U	U	U
20140517	INKNP0428A	KM	M	A	-	U
20140109	INKNP0329A	KM	M	J	-	F
20140517	INKNP0511A	KM	F	U	U	U
20140517	INKNP0512A	KM	M	A	-	U
20140517	INKNP0520A	KM	F	U	U	U
20140518	INKNP0011A	KM	M	A	-	Co
20140518	INKNP0053A	KM	M	A	-	Co
20140518	INKNP0368A	KM	F	U	U	Co
20140518	INKNP0518A	KM	M	A	-	Co
20140519	INKNP0302A	KM	F	U	U	U
20140519	INKNP0397A	MW	F	U	U	Cl
20140519	INKNP0594A	MW	F	U	U	U
20140520	INKNP0091A	MA	M	A	-	U
20140520	INKNP0148A	MA	F	U	U	U
20140520	INKNP0153A	MA	M	A	-	U
20170201	INKNP0329A	MW	M	SA	-	Cr
20140520	INKNP0245A	MA	M	A	-	Cr
20140520	INKNP0267A	MA	F	U	U	Cr
20140520	INKNP0310A	MA	F	A	U	Cr
20140520	INKNP0483A	MA	M	A	-	Cr
20140520	INKNP0516A	MA	M	A	-	Cr
20140520	INKNP0547A	MA	M	A	-	Cr
20140520	INKNP0607A	MA	F	U	U	Cl
20140520	INKNP0608A	MA	F	U	U	Cl, Co
20140520	INKNP0609A	MA	F	U	U	U
20140520	INKNP0610A	MA	M	A	-	F
20140520	INKNP0611A	MA	F	U	U	Cr
20140520	INKNP0612A	MA	F	U	U	U
20140520	INKNP0613A	MA	M	A	-	U
20140520	INKNP0622A	MA	M	U	U	Cl, Cr
20140521	INKNP0056A	MA	F	A	U	Cl
20140521	INKNP0110A	MA	F	U	U	U
20140521	INKNP0133A	MA	F	U	U	U
20140521	INKNP0148A	MA	F	U	U	U
20140521	INKNP0153A	MA	M	A	U	U
20140521	INKNP0163A	MA	F	U	U	Cl
20140521	INKNP0243A	MA	M	A	-	U
20140521	INKNP0250A	MA	F	U	U	Cr
20140521	INKNP0272A	MA	M	A	-	Cl
20140521	INKNP0314A	MA	F	U	U	Cr
20140521	INKNP0319A	MA	F	U	U	Cr
20140521	INKNP0322A	MA	M	A	-	Cl
20140521	INKNP0483A	MA	M	A	-	Cl
20140522	INKNP0041A	KM	F	U	U	U
20140522	INKNP0223A	MW	F	U	U	Cl
20140522	INKNP0314A	MA	F	U		Cl
20140523	INKNP0051A	MA	F	U	U	U
20140523	INKNP0142A	MA	F	U		U
20140523	INKNP0613A	MA	M	A	-	U
20140523	INKNP0643A	MA	F	U	U	Cl
20140524	INKNP0278A	MW	F	U	U	U
20140524	INKNP0324A	MW	M	A	-	U
20140524	INKNP0338A	MW	M	A	-	U
20140524	INKNP0340A	MW	M	A	-	U
20140525	INKNP0154A	MA	F	U	U	Cl
20140525	INKNP0396A	MA	F	U	U	U
20140525	INKNP0408A	KM	F	U	U	U
20140429	INKNP0340A	MW	M	SA	-	U
20140525	INKNP0542A	MA	F	U	U	U
20140525	INKNP0607A	MA	F	U	U	U
20140525	INKNP0623A	MA	U	U	U	U
20140525	INNLP0229A	MA	M	A		U
20140527	INKNP0393A	KM	F	U	U	U
20140527	INKNP0428A	KM	M	A	-	Cl
20140527	INKNP0500A	KM	F	A	U	Cl
20140527	INKNP0572A	MW	M	A	-	Cl
20140528	INKNP0022A	MA	F	A	U	U
20140528	INKNP0034A	MA	F	U	U	Cl
20140528	INKNP0111A	MA	U	U	U	Cl
20140528	INKNP0123A	MA	F	U	U	U
20140528	INKNP0142A	MA	F	U	U	Cl
20140528	INKNP0166A	KM	M	A	U	Cl
20140528	INKNP0220A	MA	M	A	-	U
20140528	INKNP0354A	MA	F	U	U	Cr
20131209	INKNP0355A	KM	M	J	-	Cl
20140528	INKNP0392A	MA	F	U	U	U
20140507	INKNP0355A	MW	M	J	-	U
20140528	INKNP0485A	MA	F	U	U	U
20140528	INKNP0486A	MA	M	A	-	U
20140528	INKNP0355A	MA	M	J	-	Cl
20140528	INKNP0488A	MA	F	U	U	U
20140528	INKNP0489A	MA	F	U	U	U
20140528	INKNP0491A	MA	F	U	U	U
20140528	INKNP0498A	MW	F	U	U	U
20140528	INKNP0503A	MA	M	A	-	U
20140528	INKNP0550A	MW	M	A	-	U
20140528	INKNP0551A	MW	U	U	U	U
20140528	INKNP0640A	MW	M	A	-	Cl
20140528	INKNP0641A	MW	M	A	-	Cl
20140528	INKNP0643A	MA	F	U	U	U
20140528	INNLP0229A	MA	M	A		Cl
20140529	INKNP0398A	KM	M	A	U	Cl
20140529	INKNP0472A	KM	M	A	-	Cr
20140603	INKNP0078A	MA	M	A	-	U
20140603	INKNP0142A	MA	F	U	U	U
20140603	INKNP0156A	MA	F	U	U	Cl
20140603	INKNP0250A	MA	F	U	U	U
20140603	INKNP0319A	MA	F	U	U	U
20140603	INKNP0493A	MA	M	A	-	U
20140603	INKNP0494A	MA	M	U	U	U
20140604	INKNP0024A	KM	F	U	U	Cl
20130802	INKNP0360A	KM	M	J	-	Cl
20140604	INKNP0053A	KM	M	A	-	Cr
20140604	INKNP0082A	KM	F	A	U	Cl
20140604	INKNP0111A	MA	U	U	U	Cr
20140604	INKNP0241A	KM	F	A	U	U
20140604	INKNP0279A	KM	M	A	-	Cr
20140604	INKNP0280A	MA	M	A		U
20140604	INKNP0310A	MA	F	A	U	U
20140604	INKNP0462A	KM	F	U	U	U
20140604	INKNP0503A	MA	M	A		U
20140604	INKNP0649A	MA	F	U	U	U
20140604	INKNP0650A	MA	M	A	-	U
20140604	INNLP0229A	MA	M	A		U
20140605	INKNP0232A	KM	F	U	U	U
20140605	INKNP0289A	KM	U	U	U	U
20140605	INKNP0412A	KM	F	U	U	U
20140605	INKNP0421A	KM	M	U	U	U
20140605	INKNP0462A	KM	F	U	U	Cl
20140606	INKNP0588A	KM	F	U	U	U
20140614	INKNP0081A	KM	F	U	U	U
20140614	INKNP0150A	KM	F	U	U	U
20140614	INKNP0175A	KM	M	A	-	U
20140614	INKNP0182A	KM	M	A	-	U
20140614	INKNP0232A	KM	F	A	U	U
20140614	INKNP0246A	KM	F	U	U	U
20140614	INKNP0321A	KM	M	A	-	U
20140614	INKNP0364A	KM	M	A	-	U
20140614	INKNP0414A	KM	F	U	U	U
20140614	INKNP0415A	KM	M	A	-	U
20140617	INKNP0009A	KM	M	A	-	U
20140617	INKNP0094A	KM	F	U	U	U
20140617	INKNP0297A	KM	M	A	-	U
20140618	INKNP0150A	KM	F	U	U	U
20140618	INKNP0182A	KM	M	A	U	U
20140618	INKNP0364A	KM	M	A		U
20140619	INKNP0416A	KM	F	U	U	U
20140619	INKNP0552A	KM	M	A	-	Cl
20140622	INKNP0147A	MA	F	A	U	U
20140622	INKNP0303A	MA	M	U	-	U
20140622	INKNP0631A	MA	M	U	U	U
20140626	INKNP0055A	KM	F	U	U	U
20140626	INKNP0180A	KM	F	A	U	U
20140627	INKNP0426A	MW	F	U	U	U
20140627	INKNP0501A	MW	M	A	-	U
20140629	INKNP0226A	MW	F	U	U	Cl
20140629	INKNP0448A	MW	M	A	-	U
20140629	INKNP0502A	MW	M	A	-	Cl
20140629	INKNP0504A	MW	F	U	U	U
20140629	INKNP0505A	MW	F	U	U	U
20140629	INKNP0553A	MW	M	A	-	U
20140703	INKNP0332A	KM	F	U		U
20140703	INKNP0557A	KM	M	A		F
20140706	INKNP0261A	MW	F	U		U
20140708	INKNP0015A	MA	F	U	U	U
20140708	INKNP0056A	MA	F	A	U	U
20131212	INKNP0360A	KM	M	SA	-	U
20140708	INKNP0109A	MA	M	A	-	U
20140708	INKNP0154A	MA	F	A	U	U
20140708	INKNP0180A	KM	F	A	U	U
20140708	INKNP0272A	MA	M	A	-	U
20140708	INKNP0279A	MA	M	A	-	U
20140708	INKNP0283A	MA	U	U	U	U
20140708	INKNP0341A	MA	F	U	U	U
20140708	INKNP0349A	MA	M	A	-	U
20140708	INKNP0403A	MA	F	U	U	U
20140708	INKNP0431A	MA	M	A	-	U
20140710	INKNP0015A	KM	F	U	U	U
20140713	INKNP0039A	KM	F	U	U	U
20140713	INKNP0140A	MA	M	A	-	U
20140714	INKNP0010A	KM	F	U	U	U
20140714	INKNP0172A	KM	F	U	U	U
20140714	INKNP0280A	KM	M	A	U	U
20140715	INKNP0024A	KM	F	U	U	U
20140717	INKNP0010A	KM	F	U	U	U
20140717	INKNP0130A	KM	M	U	U	U
20140718	INKNP0222A	KM	M	A	-	U
20140724	INKNP0550A	MW	M	A	-	Cl
20140726	INKNP0026A	MW	M	A	-	Cl
20140726	INKNP0202A	MW	F	U	U	Cl
20140727	INKNP0026A	MW	M	A	-	Co
20150304	INKNP0365A	KM	M	J	-	U
20140727	INKNP0202A	MW	F	U	U	Cl, Co
20140729	INKNP0133A	MW	F	A	U	U
20140729	INKNP0277A	KM	M	A	U	U
20140729	INKNP0339A	MA	U	U	U	U
20140415	INKNP0381A	MA	M	SA	-	U
20140729	INKNP0426A	MW	F	A	U	U
20131105	INKNP0394A	KM	M	SA	-	U
20140730	INKNP0276A	MW	F	U	U	Cl
20140731	INKNP0646A	KM	M	A	-	U
20140802	INKNP0039A	MW	F	U	U	Cl
20140803	INKNP0160A	CL	F	U	U	F
20140805	INKNP0109A	MA	M	A	U	U
20140516	INKNP0404A	KM	M	SA	-	U
20140805	INKNP0148A	MA	F	U	U	U
20140805	INKNP0633A	MA	M	U	U	U
20140729	INKNP0422A	MA	M	J	-	U
20140811	INKNP0050A	KM	F	U	U	U
20140811	INKNP0070A	KM	M	U	U	U
20140811	INKNP0101A	KM	M	A	-	U
20140811	INKNP0222A	KM	M	A	U	U
20140811	INKNP0421A	KM	M	U	U	U
20140811	INKNP0423A	KM	M	A	-	U
20140811	INKNP0424A	KM	F	U	U	U
20140811	INKNP0598A	CL	M	J	U	U
20140811	INKNP0652A	KM	F	U	U	U
20140812	INKNP0121A	KM	F	A	U	U
20140812	INKNP0133A	KM	F	A	U	U
20140812	INKNP0137A	KM	M	A	-	U
20140812	INKNP0148A	KM	F	U	U	U
20140812	INKNP0182A	KM	M	A	-	U
20140812	INKNP0222A	KM	M	A	-	U
20140813	INKNP0104A	MW	F	U	U	U
20140813	INKNP0125A	MW	M	A	-	U
20140813	INKNP0138A	MW	M	A	-	U
20140813	INKNP0276A	MW	F	U	U	Cl
20140813	INKNP0292A	CL	M	A	-	U
20140813	INKNP0425A	CL	F	U	U	U
20140923	INKNP0422A	MA	M	J	U	U
20140813	INKNP0570A	MW	F	U	U	U
20140815	INKNP0182A	KM	M	A	-	U
20140819	INKNP0272A	MA	M	A	-	U
20161120	INKNP0422A	KM	M	J		Cl
20140819	INKNP0632A	MA	M	A	-	U
20140822	INKNP0136A	CL	M	J	U	U
20140823	INKNP0528A	MW	U	U		U
20140827	INKNP0030A	MW	M	U	U	U
20140828	INKNP0008A	KM	F	U	U	U
20140828	INKNP0041A	KM	F	U	U	U
20140828	INKNP0135A	KM	F	U	U	U
20140828	INKNP0137A	KM	M	A	-	U
20140903	INKNP0080A	MA	M	A	-	U
20140903	INKNP0097A	MA	M	A	-	U
20140903	INKNP0146A	MA	F	A	Y	U
20140903	INKNP0150A	MA	F	U	U	U
20140903	INKNP0236A	MA	M	A	-	U
20140903	INKNP0379A	MA	F	U	U	U
20140429	INKNP0427A	MW	M	J	-	U
20140903	INKNP0602A	MA	M	A	-	U
20140903	INKNP0622A	MA	M	A	-	U
20140903	INKNP0628A	MA	M	A	-	U
20140903	INKNP0653A	MA	F	U	U	U
20140903	INKNP0654A	MA	M	A	-	U
20140903	INKNP0655A	MA	M	A	U	U
20140903	INKNP0656A	MA	F	U	U	U
20140903	INKNP0657A	MA	F	U	U	U
20140905	INKNP0160A	CL	F	U	U	U
20140908	INKNP0136A	CL	M	J	U	Cl
20140908	INKNP0171A	CL	F	U	U	U
20140908	INKNP0598A	CL	M	J	U	U
20140909	INKNP0301A	KM	M	A	-	Cl
20140909	INKNP0357A	KM	F	A	U	U
20140910	INKNP0111A	MA	U	U	U	Cr
20140501	INKNP0427A	MW	M	J	-	Cr
20140911	INKNP0107A	CL	F	U	U	U
20140911	INKNP0136A	CL	M	J	-	F
20140911	INKNP0186A	MW	F	A	U	U
20140911	INKNP0292A	CL	M	A	-	U
20140911	INKNP0425A	CL	F	U	U	F
20140911	INKNP0598A	CL	M	J	-	F
20140911	INKNP0660A	CL	M	A	-	F
20140912	INKNP0021A	KM	F	U	U	Cl
20140912	INKNP0110A	MA	F	U	U	U
20140912	INKNP0379A	MA	F	U	U	U
20140729	INKNP0427A	MW	M	J	-	U
20140813	INKNP0427A	MW	M	J	-	U
20140914	INKNP0292A	CL	M	A	U	U
20140918	INKNP0111A	MA	U	U	U	U
20140923	INKNP0076A	MA	F	U	U	U
20140923	INKNP0091A	MA	M	A	U	U
20140923	INKNP0231A	KM	F	U	U	Cl
20150421	INKNP0427A	MW	M	J	-	Cr
20140923	INKNP0430A	KM	F	U	U	U
20140924	INKNP0476A	MA	M	A	-	U
20140929	INKNP0186A	KM	F	A	Y	U
20140929	INKNP0628A	KM	M	A	-	U
20141002	INKNP0210A	KM	F	U	U	Cl
20141003	INKNP0178A	MW	F	A	U	U
20141003	INKNP0472A	MW	M	A	-	Cl
20141003	INNLP0442A	MW	M	A	-	U
20141006	INKNP0102A	MA	M	A	-	Cr
20141006	INKNP0110A	MA	F	U	U	U
20141006	INKNP0115A	MA	F	U	U	Cr
20141006	INKNP0140A	MA	M	A	-	Co
20141006	INKNP0146A	MA	F	A	U	U
20141006	INKNP0178A	MA	F	A	N	Cr
20141006	INKNP0201A	MA	M	A	-	U
20141006	INKNP0272A	MA	M	A	-	Cr
20141006	INKNP0278A	MA	F	U	U	Cr
20141006	INKNP0315A	MA	M	U	U	U
20141006	INKNP0321A	MA	M	A	-	Cr
20141006	INKNP0379A	MA	F	U	N	U
20141006	INKNP0441A	MA	U	U	U	Cr
20141006	INKNP0444A	MA	M	A	-	Cr
20150422	INKNP0427A	MW	M	J	-	U
20141006	INKNP0470A	MA	M	A	-	Cr
20141006	INKNP0595A	MA	M	A	-	U
20141006	INKNP0607A	MA	F	U	U	U
20141006	INKNP0616A	MA	M	A	-	U
20141006	INKNP0621A	MA	M	A	-	U
20141006	INKNP0624A	MA	M	A	-	U
20150520	INKNP0427A	MW	M	J	-	Cr
20141006	INKNP0662A	MA	F	U	U	Cl
20141006	INKNP0664A	MA	M	A	-	U
20141006	INKNP0665A	MA	F	U	U	U
20140528	INKNP0447A	MA	M	J	-	Cr
20141006	INKNP0682A	MA	F	U	N	U
20140819	INKNP0447A	MA	M	J	U	U
20141006	INKNP0712A	MA	M	A	-	Cr
20141007	INKNP0080A	MA	M	A	-	U
20141007	INKNP0102A	MA	M	A	-	U
20141007	INKNP0109A	MA	M	A	-	Cr
20141007	INKNP0111A	MA	U	U	U	U
20141007	INKNP0233A	MA	M	A	U	Cl
20141007	INKNP0250A	MA	F	U	U	U
20141007	INKNP0383A	MA	F	U	U	U
20141006	INKNP0447A	MA	M	J	U	U
20141007	INKNP0498A	MA	F	U	U	U
20141010	INKNP0437A	KM	U	U	U	U
20141011	INKNP0024A	MW	F	U	U	U
20141011	INKNP0109A	MA	M	A	-	U
20141011	INKNP0190A	MW	M	U	U	U
20141011	INKNP0247A	MW	M	A	-	U
20141011	INKNP0430A	MW	F	U	U	Cl
20141011	INKNP0473A	MA	M	A	-	U
20141011	INKNP0497A	MW	F	U	U	Cl
20141013	INKNP0157A	MW	M	A	-	Co
20141013	INKNP0178A	MW	F	A	-	Co
20141013	INKNP0324A	MW	M	A	-	Co
20141013	INKNP0472A	MW	M	A	-	Co
20141013	INKNP0501A	MW	M	A	-	Co
20141013	INKNP0723A	MW	F	A	U	Co
20141013	INKNP0755A	MW	M	A	-	Co
20141013	INNLP0442A	MW	M	A	-	Co
20141018	INKNP0598A	CL	M	J	-	U
20141023	INKNP0089A	KM	M	A	-	U
20141023	INKNP0242A	KM	M	A	-	Cl
20141023	INKNP0268A	KM	M	A	U	U
20141023	INKNP0693A	KM	F	U	U	Cl
20141023	INKNP0756A	KM	M	U	U	U
20141023	INKNP0757A	KM	M	A	-	Cl
20141026	INKNP0112A	MA	F	U	U	U
20141026	INKNP0152A	KM	F	U	U	U
20141026	INKNP0303A	MA	M	U	-	U
20141026	INKNP0457A	MA	U	U	U	U
20141026	INKNP0478A	MA	F	A	U	U
20141026	INKNP0479A	MA	M	U	-	U
20141028	INKNP0178A	KM	F	A	U	U
20141028	INKNP0459A	KM	F	U	U	U
20141028	INKNP0460A	KM	M	U	-	U
20141028	INKNP0472A	KM	M	A	-	U
20141125	INKNP0447A	MA	M	J	-	Cr
20141029	INKNP0146A	MA	F	A	Y	U
20141029	INKNP0150A	KM	F	U	U	Cr
20141029	INKNP0271A	MA	M	A	-	U
20141029	INKNP0272A	MA	M	A	-	U
20141029	INKNP0299A	MA	F	A	Y	Cr
20141029	INKNP0310A	MA	F	A	U	U
20141029	INKNP0339A	MA	U	U	U	U
20141029	INKNP0392A	MA	F	U	U	U
20141029	INKNP0482A	MA	M	U	-	U
20141029	INKNP0502A	MA	M	A	-	U
20150413	INKNP0447A	MA	M	J	-	Cr
20141029	INKNP0750A	MA	F	A	Y	U
20141030	INKNP0353A	KM	M	A		U
20141031	INKNP0136A	CL	M	J	U	U
20141031	INKNP0139A	KM	F	U	U	U
20141031	INKNP0306A	KM	M	U	U	U
20141031	INKNP0571A	KM	F	U	-	U
20141102	INKNP0001A	KM	F	A	U	U
20141102	INKNP0410A	KM	M	A	-	Co
20141102	INKNP0644A	KM	F	U	U	Co
20141102	INKNP0645A	KM	M	A	-	Co
20141104	INKNP0416A	KM	F	U	U	Cr
20141105	INKNP0063A	MA	M	A	-	Cl
20141105	INKNP0081A	MA	F	U	U	Cr
20141105	INKNP0113A	MA	F	U	U	Cr
20141105	INKNP0141A	MA	M	A	-	Cr
20141105	INKNP0152A	MA	F	U	U	Cr
20141105	INKNP0214A	MA	M	A	-	U
20141105	INKNP0229A	MA	M	U	U	U
20141105	INKNP0339A	MA	U	U	N	Cr
20141105	INKNP0397A	MA	F	U	U	U
20141105	INKNP0418A	MA	F	U	U	Cr
20141105	INKNP0671A	MA	F	U	U	Cl
20141105	INKNP0758A	MA	M	A	-	U
20141105	INKNP0759A	MA	M	A	-	U
20141111	INKNP0111A	MA	U	U	U	Cr
20141111	INKNP0155A	MA	F	U	U	Cl
20141111	INKNP0202A	KM	F	U	U	Cl
20141111	INKNP0375A	MA	M	A	-	Cl
20141111	INKNP0482A	MA	M	U	U	Cr
20141111	INKNP0658A	MA	U	U	U	Cr
20141112	INKNP0087A	MA	F	U	U	U
20141112	INKNP0104A	MA	F	U	U	U
20141112	INKNP0146A	MA	F	A	Y	U
20141112	INKNP0250A	MA	F	U	U	U
20141112	INKNP0267A	MA	F	U	U	U
20141112	INKNP0299A	MA	F	A	U	U
20141112	INKNP0303A	MA	M	A	-	Cl
20141112	INKNP0444A	MA	M	A	-	U
20141112	INKNP0564A	MA	F	U	N	U
20141112	INKNP0633A	MA	M	A		U
20141112	INKNP0644A	MA	F	U	U	U
20141112	INKNP0658A	MA	U	U	U	U
20141112	INKNP0666A	MA	F	U	U	U
20141112	INKNP0667A	MA	F	U	U	U
20141115	INKNP0671A	MW	F	A		Cl
20141116	INKNP0180A	KM	F	A	U	U
20141116	INKNP0343A	KM	M	A	-	U
20141120	INKNP0109A	MA	M	A	-	Cr
20141120	INKNP0111A	MA	U	U	U	U
20141120	INKNP0146A	MA	F	A	Y	U
20141120	INKNP0228A	MA	M	A	-	U
20141120	INKNP0267A	MA	F	U	U	U
20141125	INKNP0066A	MA	F	U	U	U
20141125	INKNP0080A	MA	M	A	-	U
20140517	INKNP0453A	KM	M	SA	-	U
20141125	INKNP0140A	MA	M	A	-	U
20141125	INKNP0146A	MA	F	A	Y	Co
20141125	INKNP0385A	MA	M	A	U	F
20130316	INKNP0455A	KM	M	J	-	F
20141125	INKNP0470A	MA	M	A	-	Cr
20150304	INKNP0455A	KM	M	SA	-	U
20141125	INKNP0487A	MA	M	U	U	U
20150505	INKNP0455A	KM	M	SA	-	Cl
20141125	INKNP0642A	MA	F	U	U	Cl
20130412	INKNP0468A	KM	M	J	-	U
20141125	INKNP0471A	MA	M	J	-	U
20141126	INKNP0471A	MA	M	J	-	Cr
20141125	INKNP0753A	MA	M	A	-	Co
20161011	INKNP0471A	MA	M	J	-	Cr
20141204	INKNP0019A	MW	F	A	U	Cl
20141204	INKNP0128A	MW	M	A	-	Cl
20141204	INKNP0177A	MW	M	U	U	Cr
20141204	INKNP0273A	MW	F	A	U	Cl
20141204	INKNP0675A	MW	F	A	U	Cr
20141204	INKNP0676A	MW	F	A	U	Cl
20141205	INKNP0028A	KM	F	U	U	U
20141205	INKNP0040A	KM	F	U	U	Cl
20141205	INKNP0101A	KM	M	A	-	Cl
20141205	INKNP0102A	KM	M	A	-	Cr
20141205	INKNP0742A	KM	M	A	-	Cl, Cr
20141206	INKNP0195A	KM	M	A	-	Cl
20141206	INKNP0633A	KM	M	A	-	Cl
20141206	INKNP0743A	KM	F	U	U	Cr
20141211	INKNP0070A	MW	M	U	U	Cl
20141211	INKNP0189A	MW	M	A	-	Cl
20141211	INKNP0532A	MW	M	A	-	Cl
20141211	INKNP0744A	MW	M	A	-	Cl
20141215	INKNP0024A	MW	F	U	U	Cl
20141215	INKNP0430A	MW	F	U	U	Cl
20141215	INKNP0575A	MW	F	U	U	Cl
20141215	INKNP0669A	MW	M	A	-	Cl, Cr
20170825	INKNP0471A	MA	M	J	-	U
20141216	INKNP0026A	MW	M	A	-	Cl
20141216	INKNP0050A	MW	F	A	Y	Cl
20141216	INKNP0368A	KM	F	A	U	U
20141216	INKNP0369A	KM	U	U	U	U
20141216	INKNP0455A	KM	M	U	U	U
20141216	INKNP0524A	MW	F	A	Y	Cr
20141216	INKNP0530A	MW	F	A	Y	Cr
20141216	INKNP0538A	MW	F	U	U	Cl
20141216	INKNP0584A	MW	F	U	U	Cr
20141216	INKNP1033A	MW	F	U	U	Cl
20141221	INKNP0688A	MA	F	U	U	U
20141222	INKNP0041A	KM	F	U	U	Cl
20141222	INKNP0693A	KM	F	U	U	Cl
20141229	INKNP0172A	MW	F	U	U	U
20141229	INKNP0457A	MW	U	U	U	Cl
20141229	INKNP0458A	MW	U	U	U	U
20150102	INKNP0760A	MW	F	U	U	Cl
20150104	INKNP0147A	MW	F	A	U	Cl, Cr
20150104	INKNP0152A	MW	F	U	U	Cl, Cr
20150104	INKNP0231A	MW	F	U	U	Cl
20150104	INKNP0256A	MW	M	A	-	Cl
20150104	INKNP0319A	MW	F	U	U	Cr
20150104	INKNP0445A	MW	F	U	U	Cl
20150104	INKNP0684A	MW	F	A	U	Cl
20150104	INKNP0685A	MW	M	A	-	Cl
20150107	INKNP0070A	MW	M	U	U	Cl
20150107	INKNP0075A	MW	F	U	U	Cl
20150107	INKNP0166A	MW	M	A	U	Cl
20150107	INKNP0284A	MW	F	U	U	Cl
20150107	INKNP0439A	MW	F	U	U	Cl
20150107	INKNP0470A	MW	M	A	-	Cr
20150107	INKNP0560A	MW	F	U	U	Cl
20150107	INKNP0564A	MW	F	U	U	Cl
20150107	INKNP0691A	MW	F	U	U	U
20150107	INKNP0692A	MW	M	A	-	U
20150107	INKNP0693A	MW	F	U	U	Cl
20150119	INKNP0012A	KM	F	U	U	Cr
20150119	INKNP0613A	KM	M	A	-	U
20150119	INKNP0695A	KM	F	U	U	Cr
20150119	INKNP0696A	KM	M	U	U	Cr
20150125	INKNP0546A	MW	F	U	U	Cl
20150126	INKNP0078A	KM	M	A	-	Cr
20150126	INKNP0333A	KM	F	U	U	U
20150126	INKNP0716A	KM	F	U	U	Cl
20150211	INKNP0468A	KM	M	A	-	Cl
20150220	INKNP0181A	MW	F	A	U	Cl
20150220	INKNP0698A	MW	M	A	-	Cl
20150228	INKNP0122A	KM	M	A	-	U
20150228	INKNP0360A	KM	M	U	U	U
20150228	INKNP0436A	KM	F	U	U	U
20150304	INKNP0061A	KM	F	U	U	U
20150304	INKNP0079A	KM	F	U	N	U
20150304	INKNP0121A	KM	F	A	Y	U
20150304	INKNP0214A	KM	M	A	-	U
20150304	INKNP0333A	KM	F	U	U	U
20141007	INKNP0473A	MA	M	SA	-	Cr
20140528	INKNP0487A	MA	M	J	-	U
20150304	INKNP0476A	KM	M	A	-	Cl
20150304	INKNP0761A	KM	M	A	-	Cr
20150304	INKNP0762A	KM	M	A	-	U
20150304	INKNP0763A	KM	F	U	U	U
20150306	INKNP0121A	KM	F	A	Y	Cr
20150307	INKNP0052A	MW	M	A	-	Cr
20150308	INKNP0438A	KM	M	A	-	Cl
20150308	INKNP0687A	KM	M	A	-	Cl
20150311	INKNP0055A	KM	F	U	U	Cl
20150311	INKNP0065A	KM	F	A	Y	Cl
20150311	INKNP0221A	KM	F	A	Y	U
20150311	INKNP0574A	KM	F	U	U	U
20150311	INKNP0725A	KM	M	A	-	U
20150313	INKNP0554A	MW	F	A	U	Cl
20150313	INKNP0568A	MW	F	U	U	U
20150317	INKNP0202A	MW	F	U	U	U
20150317	INKNP0247A	KM	M	A	-	Cr
20150317	INKNP0313A	KM	F	U	U	U
20150317	INKNP0338A	KM	M	A	-	U
20150317	INKNP0405A	KM	F	U	U	U
20150317	INKNP0430A	KM	F	U	U	U
20150317	INKNP0570A	MW	F	U	U	U
20150317	INKNP0647A	KM	M	A	-	U
20150317	INKNP0648A	KM	F	A	Y	Cl
20150317	INKNP0963A	MW	F	U	U	Cl
20150319	INKNP0003A	KM	F	U	U	U
20150319	INKNP0699A	KM	M	U	U	Cl
20150319	INKNP0717A	KM	M	A	-	U
20150321	INKNP0732A	MW	F	A	Y	Cl
20150324	INKNP0068A	KM	F	U	U	Cl
20150324	INKNP0152A	MW	F	U	U	Cl
20150324	INKNP0339A	KM	U	U	U	Cl
20150324	INKNP0575A	MW	F	U	U	Cl
20150324	INKNP0604A	KM	M	A	-	Cl
20150324	INNLP0361A	KM	M	A	-	Cr
20150326	INKNP0023A	KM	M	A	-	U
20150326	INKNP0041A	KM	F	U	U	U
20150326	INKNP0072A	KM	F	U	N	U
20150326	INKNP0122A	KM	M	A	-	U
20150326	INKNP0133A	KM	F	A	U	U
20150326	INKNP0135A	KM	F	U	N	U
20150326	INKNP0149A	KM	M	A	-	U
20150326	INKNP0182A	KM	M	A	-	U
20150326	INKNP0186A	KM	F	A	Y	Cl
20150326	INKNP0193A	KM	F	A	Y	U
20150326	INKNP0222A	KM	M	A	-	U
20150326	INKNP0232A	KM	F	A	U	U
20150326	INKNP0286A	MW	M	A	-	Cr
20150326	INKNP0308A	KM	F	A	U	U
20150326	INKNP0310A	KM	F	A	U	U
20150326	INKNP0318A	KM	F	U	U	Cl
20150326	INKNP0354A	KM	F	A	Y	U
20150326	INKNP0518A	KM	M	A	-	Cl
20150326	INKNP0572A	MW	M	A	-	U
20150326	INKNP0574A	MW	F	U	U	Cl
20150326	INKNP0580A	KM	F	U	U	Cl
20150326	INKNP0583A	MW	F	U	U	U
20150326	INKNP0589A	KM	F	U	U	Cl
20150326	INKNP0590A	KM	M	A	-	Cl
20150326	INKNP0638A	KM	F	U	U	Cr
20150326	INKNP0654A	KM	M	A	-	Cl
20150326	INKNP0704A	MW	M	U	-	Cl
20150326	INKNP0704A	KM	M	U	U	Cr
20150326	INKNP0735A	KM	F	U	U	U
20150326	INKNP0764A	KM	M	A	-	U
20150326	INKNP0765A	KM	F	U	N	U
20150326	INKNP0766A	MW	F	A	Y	U
20150326	INKNP0767A	MW	F	U	U	Cl
20150326	INKNP0768A	MW	F	U	U	Cl
20150326	INKNP0769A	MW	F	A	U	Cl, Co
20150326	INKNP0770A	MW	F	U	U	Cl
20150326	INKNP0771A	MW	F	U	U	Cr
20150327	INKNP0161A	MW	F	U	U	Cl
20150327	INKNP0572A	MW	M	A	-	Cl
20150327	INKNP0591A	MW	F	A	U	Cl
20150328	INKNP0558A	KM	M	A	-	U
20150328	INKNP0772A	KM	M	A	-	U
20150409	INKNP0549A	MW	M	A	-	Cl
20150409	INKNP0597A	MW	M	A	-	Cr
20150410	INKNP0110A	MA	F	U	U	F
20150410	INKNP0122A	KM	M	A	-	Cr
20150410	INKNP0148A	MA	F	A	Y	F
20150410	INKNP0156A	MA	F	U	U	Cr
20150410	INKNP0188A	MA	F	U	U	F
20150410	INKNP0211A	KM	F	U	U	Cl
20150410	INKNP0263A	MA	F	U	U	F
20150410	INKNP0406A	KM	M	A	-	Cr
20150410	INKNP0433A	KM	F	U	U	U
20150410	INKNP0444A	KM	M	A	-	U
20150410	INKNP0462A	KM	F	U	U	Cl
20150410	INKNP0482A	MA	M	U	U	F
20150410	INKNP0500A	MA	F	A	U	F
20150410	INKNP0524A	MA	F	A	Y	F
20150410	INKNP0599A	KM	F	U	U	Cl
20150410	INKNP0612A	MA	F	A	U	F
20150410	INKNP0613A	MA	M	A	-	F
20150410	INKNP0614A	MA	F	U	U	F
20150410	INKNP0615A	MA	U	U	U	F
20150410	INKNP0695A	KM	F	U	U	Cr
20150410	INKNP0752A	KM	F	A		U
20150410	INKNP0772A	KM	M	A	-	Cr
20150410	INKNP0774A	KM	F	A	-	Cl
20150410	INKNP0775A	KM	F	A	Y	Cl
20150410	INKNP0776A	KM	F	U	N	Cr
20150410	INKNP0777A	KM	F	A	Y	Cr
20150410	INNLP0229A	MA	M	A		U
20150411	INKNP0078A	MA	M	A	-	Cr
20150411	INKNP0119A	MA	F	A	U	Cl
20150411	INKNP0148A	MA	F	A	Y	Cr
20150411	INKNP0156A	MA	F	U	U	U
20150411	INKNP0196A	MA	F	U	U	Cr
20150411	INKNP0245A	MA	M	A	-	Cr
20150411	INKNP0271A	MA	M	A	-	Cr
20150411	INKNP0392A	MA	F	U	U	Cr
20150411	INKNP0395A	MA	M	A	-	U
20150411	INKNP0464A	MA	F	U	N	Cr
20150411	INKNP0517A	MW	F	U	U	Cl
20150411	INKNP0568A	MA	F	U	N	Cl
20150411	INKNP0600A	MA	M	A	-	Cl
20150411	INKNP0602A	MA	M	A	-	Cr
20150411	INKNP0612A	MA	F	A		Cr
20150411	INKNP0629A	MA	M	A	-	U
20150411	INKNP0698A	MA	M	A	-	U
20150411	INKNP0733A	MA	F	U	U	U
20150411	INKNP0754A	MA	F	U	U	Cr
20150411	INKNP0778A	MA	F	U	U	U
20150411	INKNP0793A	MA	F	U		U
20150412	INKNP0087A	KM	F	U	U	U
20150412	INKNP0124A	KM	M	A	-	Cl
20150412	INKNP0166A	KM	M	A	-	Cl
20150412	INKNP0418A	KM	F	U	U	Cl
20150413	INKNP0038A	MA	F	U	N	Cr
20150413	INKNP0041A	MA	F	A	Y	Cr
20150413	INKNP0110A	MA	F	U	U	Cr
20150413	INKNP0154A	MA	F	A	U	Cr
20150413	INKNP0156A	MA	F	U	U	Cr
20150413	INKNP0266A	MA	F	U	U	U
20150413	INKNP0272A	MA	M	A	-	U
20150413	INKNP0282A	MA	F	U	U	U
20150413	INKNP0314A	MA	F	U	U	U
20150708	INKNP0492A	KM	M	SA	-	U
20150413	INKNP0424A	MA	F	U	U	U
20150413	INKNP0441A	MA	U	U	U	U
20150520	INKNP0495A	MW	M	SA	-	Cl
20150413	INKNP0482A	MA	M	U	U	Cr
20150413	INKNP0483A	MA	M	A	-	U
20150413	INKNP0489A	MA	F	U	U	U
20150413	INKNP0524A	MA	F	A	Y	U
20150413	INKNP0543A	MA	M	A	-	U
20150413	INKNP0548A	MA	F	U	U	U
20150413	INKNP0614A	MA	U	U	U	Cr
20150413	INKNP0616A	MA	M	A	-	U
20150413	INKNP0637A	MA	F	U	U	U
20140515	INKNP0515A	KM	M	SA	U	F
20150413	INNLP0229A	MA	M	A		U
20140311	INKNP0540A	MA	M	J	-	U
20150416	INKNP0598A	CL	M	J	U	Cr
20150418	INKNP0065A	KM	F	A	U	U
20150421	INKNP0075A	MW	F	A	Y	Cl
20150421	INKNP0082A	MW	F	A	U	Cl
20150421	INKNP0100A	MW	M	A	U	Cl
20150421	INKNP0127A	MW	M	A	-	Cl
20150421	INKNP0152A	MW	F	U	U	Cl
20150421	INKNP0251A	MW	F	U	U	Cl
20150421	INKNP0267A	MW	F	U	U	U
20150421	INKNP0382A	MW	F	A	Y	Cl
20150421	INKNP0399A	MW	U	U	U	Cl
20150421	INKNP0407A	MW	F	A	Y	Cl
20140525	INKNP0540A	MA	M	J	U	U
20150421	INKNP0428A	MW	M	A	U	U
20150421	INKNP0445A	MW	F	U	U	Cl
20150421	INKNP0530A	MW	F	A	Y	Cl
20150421	INKNP0584A	MW	F	U	U	Cl
20150421	INKNP0616A	MW	M	A	-	Cl
20150421	INKNP0617A	MW	M	A	-	Cr
20150421	INKNP0618A	MW	F	A	Y	Cl
20150421	INKNP0620A	MW	M	A	-	Cr
20150421	INKNP0621A	MW	M	A	-	Cl
20150421	INKNP0629A	MW	M	A	-	Cl
20150421	INKNP0630A	MW	F	A	Y	Cl
20150421	INKNP0634A	MW	F	U	U	Cl
20150421	INKNP0635A	MW	M	A	-	Co
20150421	INKNP0636A	MW	F	U	U	Cl
20150421	INKNP0637A	MW	F	U	U	Cl, Cr
20150422	INKNP0012A	MW	F	U	N	Cr
20150422	INKNP0039A	MW	F	U	U	U
20150422	INKNP0049A	MW	F	U	N	U
20150422	INKNP0053A	MW	M	A	-	Cr
20150422	INKNP0064A	KM	F	A	U	Cl
20150422	INKNP0082A	MW	F	A	N	Cl
20150422	INKNP0085A	MW	F	U	U	U
20150422	INKNP0177A	MW	M	A	-	U
20150422	INKNP0212A	MW	F	U	U	F
20150422	INKNP0243A	MW	M	A	-	Cl
20150422	INKNP0273A	MW	F	A	U	Cr
20150422	INKNP0276A	MW	F	U		U
20150422	INKNP0286A	MW	M	A	-	U
20150422	INKNP0407A	MW	F	A	Y	Cl
20140903	INKNP0540A	MA	M	J	-	U
20150422	INKNP0472A	MW	M	A	-	U
20150422	INKNP0582A	MW	F	U	N	U
20150422	INKNP0592A	MW	F	U	U	U
20150422	INKNP0593A	MW	U	U	U	U
20150422	INKNP0594A	MW	F	U	U	Cl
20150422	INKNP0616A	MW	M	A	-	U
20150422	INKNP0634A	MW	F	U	N	U
20150422	INKNP0709A	MW	F	A	Y	U
20150422	INKNP0758A	MW	M	A	-	U
20150422	INKNP0777A	MW	F	A	U	U
20150422	INKNP0779A	MW	F	A	Y	U
20150422	INKNP0780A	MW	F	U	N	U
20150423	INKNP0356A	MW	F	U	U	U
20150423	INKNP0376A	MW	F	A	U	U
20150423	INKNP0594A	KM	F	U	U	U
20150423	INKNP0601A	MW	M	A	-	U
20150423	INKNP0781A	MW	M	U	U	U
20150423	INKNP0782A	MW	F	U	N	U
20150423	INKNP0783A	MW	F	U	U	Cl
20150423	INKNP0784A	MW	F	A	Y	U
20150423	INKNP0785A	MW	F	U	U	U
20150423	INKNP0786A	MW	M	A	-	U
20150423	INKNP0787A	MW	M	A	-	U
20150423	INKNP0788A	MW	U	U	U	U
20150502	INKNP0035A	KM	F	U	U	Cr
20150502	INKNP0197A	KM	M	A	-	Co
20150502	INKNP0223A	KM	F	U	U	Cr
20150502	INKNP0298A	KM	M	A	-	Cl
20150502	INKNP0410A	KM	M	A	-	Co
20150502	INKNP0446A	KM	M	A	-	Co
20150502	INKNP0454A	KM	M	A	-	Co
20150502	INKNP0525A	KM	M	A	-	Co
20150502	INKNP0604A	KM	M	A	-	Cr
20150502	INKNP0654A	KM	M	A	-	U
20150502	INKNP0752A	KM	F	A	U	Cr
20150502	INKNP0790A	KM	M	A	-	Co
20150503	INKNP0124A	KM	M	A	-	Cr
20150503	INKNP0307A	KM	M	A	-	Cr
20150503	INKNP0321A	KM	M	A	-	Cr
20150503	INKNP0324A	KM	M	A	-	Cl
20150503	INKNP0454A	KM	M	A	-	Cr
20150503	INKNP0737A	KM	F	U	U	Cr
20150503	INKNP0780A	KM	F	U	U	Cl, Cr
20150504	INKNP0001A	KM	F	A	U	Cr
20150504	INKNP0023A	KM	M	A	U	Cr
20150504	INKNP0035A	KM	F	U	U	Cr
20150504	INKNP0061A	KM	F	U	U	Cr
20150504	INKNP0081A	KM	F	U	U	Co
20150504	INKNP0193A	KM	F	A	U	Cr
20150504	INKNP0262A	KM	M	A	-	F
20150504	INKNP0275A	KM	U	U	U	U
20150504	INKNP0276A	KM	F	U	U	Cr
20150504	INKNP0317A	KM	M	A	-	Cr
20150504	INKNP0335A	KM	F	U	U	Cr
20150504	INKNP0374A	KM	F	U	U	U
20150504	INKNP0405A	KM	F	U	U	Cr
20150504	INKNP0450A	KM	F	U	U	Cr
20150504	INKNP0462A	KM	F	A	Y	Cr
20150504	INKNP0472A	KM	M	A	-	Cl
20150504	INKNP0501A	KM	M	A	-	Cr
20150504	INKNP0518A	KM	M	A	U	Co
20150504	INKNP0560A	KM	F	U	U	Cr
20150504	INKNP0574A	KM	F	U	U	Co
20150504	INKNP0576A	KM	M	U	U	Cl
20150504	INKNP0588A	KM	F	U	U	Cr
20150504	INKNP0719A	KM	F	A	Y	Cr
20150504	INKNP0735A	KM	F	U	U	Cr
20150504	INKNP0764A	KM	M	A	U	Cr
20150504	INKNP0791A	KM	M	A	-	Co
20150504	INKNP0792A	KM	M	A	-	Cr
20150505	INKNP0002A	MA	M	A	-	Co
20150505	INKNP0119A	MA	F	A	U	Cr
20150505	INKNP0180A	KM	F	A	U	Cr
20150505	INKNP0228A	MA	M	A	-	Co
20150505	INKNP0304A	MA	U	U	U	Cr
20150505	INKNP0341A	MA	F	A	U	Cl
20141125	INKNP0540A	MA	M	J	-	U
20150505	INKNP0554A	KM	F	A	U	Cr
20150505	INKNP0793A	MA	F	U	U	Co
20150505	INKNP0794A	MA	M	A	-	Co
20150507	INKNP0281A	MW	M	A		U
20150511	INKNP0352A	MA	F	U	U	F
20140314	INKNP0557A	KM	M	J	-	U
20150514	INKNP0038A	MA	F	U	U	Cr
20150514	INKNP0076A	MA	F	U	U	Cr
20150514	INKNP0077A	MA	M	A	-	Cl
20150514	INKNP0110A	MA	F	U	U	Cr
20150514	INKNP0115A	MA	F	U	U	Cr
20150514	INKNP0119A	MA	F	A	U	Cr
20150514	INKNP0140A	MA	M	A	-	Cr
20150514	INKNP0154A	MA	F	A	U	Cr
20150514	INKNP0156A	MA	F	A	U	Cr
20150514	INKNP0185A	MA	F	A	U	Cr
20150514	INKNP0198A	MA	F	U	U	Cr
20150514	INKNP0232A	MA	F	A	U	Cr
20150514	INKNP0271A	MA	M	A	-	Cr
20150514	INKNP0273A	MA	F	A	U	Cr
20150514	INKNP0326A	MA	F	U	U	Cr
20150514	INKNP0456A	MA	F	U	U	Cr
20150514	INKNP0482A	MA	M	U	U	Cr
20150514	INKNP0488A	MA	F	A	Y	Cr
20150514	INKNP0503A	MA	M	A	-	Cl
20150514	INKNP0555A	MA	M	A	-	Cr
20150514	INKNP0602A	MA	M	A	-	Cl, Cr
20150514	INKNP0611A	MA	F	U	U	Cr
20150514	INKNP0616A	MA	M	A	-	Cr
20150514	INKNP0626A	MA	F	A	Y	Cr
20150514	INKNP0796A	MA	M	A	-	Cr
20150518	INKNP0829A	MW	M	A	-	Cr
20150520	INKNP0116A	MW	M	U	U	Cl
20150520	INKNP0127A	MW	M	A	-	Cr
20150520	INKNP0423A	MW	M	A	-	Cr
20140421	INKNP0577A	KM	M	SA	-	Cl
20151104	INKNP0577A	KM	M	U	U	U
20150520	INKNP0528A	MW	F	U	U	Cr
20150520	INKNP0617A	MW	M	A	-	Cl, Cr
20150521	INKNP0228A	MA	M	A	-	Cr
20150521	INKNP0244A	MA	M	A	-	Cr
20150521	INKNP0282A	MA	F	A	Y	Cr
20150521	INKNP0351A	MA	M	A	-	Cr
20150521	INKNP0385A	MA	M	A	U	Cr
20150521	INKNP0396A	MA	F	A	N	Cr
20150521	INKNP0487A	MA	M	U	U	Cr
20150521	INKNP0489A	MA	F	U	U	Cr
20150521	INKNP0493A	MA	M	A	-	Cr
20150521	INKNP0498A	MA	F	U	N	Cr
20150521	INKNP0503A	MA	M	A	-	Cr
20150521	INKNP0516A	MA	M	A	-	Cr
20150521	INKNP0564A	MA	F	U	N	Cr
20150521	INKNP0611A	MA	F	U	N	Cr
20150521	INKNP0612A	MA	F	A	U	Cr
20150521	INKNP0617A	MW	M	A	-	Cr
20150521	INKNP0619A	MA	F	U	N	Cr
20150521	INKNP0733A	MA	F	U	U	Cr
20150523	INKNP0503A	MA	M	A	-	U
20150526	INKNP0035A	MA	F	U		F
20150526	INKNP0041A	MA	F	A	U	F
20150526	INKNP0063A	MA	M	A	-	Cr
20150526	INKNP0102A	MA	M	A	-	F
20150526	INKNP0119A	MA	F	A	U	Cr
20150526	INKNP0156A	MA	F	A	U	Cr
20150526	INKNP0198A	MA	F	U	U	Cr
20150526	INKNP0228A	MA	M	A	-	Co
20150526	INKNP0244A	MA	M	A	-	Co
20150526	INKNP0247A	MA	M	A	U	F
20150526	INKNP0321A	MA	M	A	-	Cr
20150526	INKNP0326A	MA	F	U	U	F
20150526	INKNP0424A	MA	F	U	U	F
20150526	INKNP0506A	MA	M	A
20150526	INKNP0624A	MA	M	A	-	F
20150526	INKNP0625A	MA	F	U	U	F
20150526	INKNP0626A	MA	U	U	U	F
20150606	INKNP0163A	MW	F	U	U	U
20150606	INKNP0345A	MW	M	U	U	U
20150606	INKNP0627A	MW	M	A	-	U
20150618	INKNP0224A	KM	M	A	-	U
20150622	INKNP0639A	KM	M	A	-	Co
20150706	INKNP0430A	KM	F	U	U	U
20140913	INKNP0598A	MA	M	J	-	Cr
20150708	INKNP0310A	KM	F	A	U	U
20150708	INKNP0342A	MW	M	A	-	Cl
20150708	INKNP0464A	MW	F	U	U	U
20150415	INKNP0598A	KM	M	J	-	Cr
20150715	INKNP0356A	MW	F	U	U	Cl
20150720	INKNP0154A	MW	F	A	U	Cr
20150721	INKNP0503A	KM	M	A	U	U
20150721	INKNP0694A	KM	M	A	-	U
20150723	INKNP0192A	KM	F	U	U	Cr
20150728	INKNP0082A	KM	F	A	U	Cl
20150730	INKNP0450A	MA	F	U	U	Cl
20150807	INKNP0598A	CL	M	J	U	U
20150811	INKNP0190A	KM	M	A	-	U
20150811	INKNP0489A	KM	F	U	U	U
20150812	INKNP0598A	CL	M	J	-	Cr
20150813	INKNP0030A	KM	M	U	U	Cr
20150815	INKNP0624A	KM	M	A	-	Cr
20150817	INKNP0107A	CL	F	U	U	Cr
20150817	INKNP0109A	CL	M	A	-	Cr
20150817	INKNP0425A	CL	F	A	U	Cr
20150817	INKNP0598A	CL	M	J	U	Cr
20150818	INKNP0246A	KM	F	U	U	Cl
20150818	INKNP0568A	MA	F	U	U	Cl
20150820	INKNP0470A	KM	M	A	-	Cr
20150820	INKNP0740A	KM	F	U	N	Cl
20150825	INKNP0689A	KM	F	U	U	Cr
20150827	INKNP0425A	CL	F	A	U	Cr
20150902	INKNP0345A	MW	M	A	-	Co
20150902	INKNP0397A	MW	F	U	U	Co
20150903	INKNP0010A	MW	F	U	U	Cl
20150903	INKNP0013A	MW	F	U	U	Cl, Co
20150903	INKNP0440A	MW	M	U	U	Cl, Co
20150903	INKNP0690A	MW	M	U	U	U
20150906	INKNP0368A	KM	F	A	U	Cr
20150910	INKNP0013A	MA	F	U	U	Cr
20150910	INKNP0052A	KM	M	A	-	U
20150910	INKNP0110A	MA	F	U	U	Cr
20150910	INKNP0115A	MA	F	A	U	Cr
20150910	INKNP0231A	KM	F	U	U	Cr
20150910	INKNP0256A	MA	M	A	-	Cl
20150910	INKNP0273A	MA	F	A	U	U
20150910	INKNP0314A	MA	F	U	U	Cr
20150910	INKNP0339A	MA	U	U	-	Cl
20150910	INKNP0445A	MA	F	A	U	Cr
20150910	INKNP0473A	MA	M	A	-	Cr
20150912	INKNP0177A	KM	M	A	U	U
20150912	INKNP0178A	KM	F	A	U	U
20150913	INKNP0594A	MW	F	U	U	Cr
20150922	INKNP0140A	MA	M	A	-	Co
20150922	INKNP0146A	MA	F	A	Y	Cr
20150922	INKNP0174A	MA	M	A	-	Co
20150922	INKNP0272A	MA	M	A	-	Co
20150922	INKNP0852A	MA	M	A	-	Co
20150922	INKNP0957A	MA	M	A	-	Co
20150922	INKNP0958A	MA	M	A	-	Co
20150922	INKNP0960A	MA	M	A	-	Co
20151002	INKNP0425A	MA	F	A	U	U
20151003	INKNP0464A	MW	F	U	U	Cl
20151003	INKNP0700A	CL	M	J	-	U
20151003	INKNP0709A	MW	F	A	U	Cl
20151004	INKNP0425A	CL	F	A	U	Cr
20151013	INKNP0659A	KM	M	A	-	Cl
20151015	INKNP0440A	KM	M	A	-	Cl
20151016	INKNP0710A	MW	F	U	U	Cr
20151017	INKNP0018A	KM	F	A	U	Cl
20151018	INKNP0582A	KM	F	U	U	Cr
20151020	INKNP0701A	KM	F	U		U
20151023	INKNP0598A	CL	M	J	-	U
20151101	INKNP0023A	KM	M	A	U	Co
20151101	INKNP0063A	KM	M	A	-	Co
20151101	INKNP0416A	KM	F	A	U	Co
20151101	INKNP0419A	KM	M	A		Co
20151103	INKNP0066A	KM	F	U	U	U
20151103	INKNP0141A	KM	M	A	-	Cr
20151103	INKNP0207A	KM	M	A	-	U
20151103	INKNP0258A	KM	M	A	-	U
20151103	INKNP0342A	KM	M	A	-	Cr
20151103	INKNP0385A	KM	M	A	-	U
20151103	INKNP0399A	KM	U	U	U	Cr
20151103	INKNP0523A	KM	F	U	U	U
20151103	INKNP0628A	KM	M	A	U	U
20151103	INKNP1019A	KM	M	A	-	U
20151104	INKNP0187A	KM	U	U	U	U
20151104	INKNP0256A	KM	M	A	U	U
20151104	INKNP0317A	KM	M	A	-	U
20151104	INKNP0325A	KM	F	U	U	U
20151104	INKNP0371A	KM	F	U	U	U
20151104	INKNP0383A	KM	F	U	U	U
20151104	INKNP0394A	KM	M	A	-	U
20151104	INKNP0498A	KM	F	U	U	U
20170419	INKNP0598A	KM	M	SA	-	U
20151104	INKNP0761A	KM	M	A	-	U
20151104	INKNP0797A	KM	U	U	U	U
20151104	INKNP0798A	KM	F	U	U	U
20151104	INKNP0799A	KM	F	U	U	U
20151104	INKNP0800A	KM	F	U	U	U
20151104	INKNP0801A	KM	F	U	U	U
20151104	INKNP0802A	KM	U	U	U	U
20151111	INKNP0711A	MW	M	A	-	Cl
20151113	INKNP0027A	MW	F	U	U	Cl
20151113	INKNP0173A	KM	M	A	-	U
20140509	INKNP0603A	KM	M	J	-	U
20140509	INKNP0604A	KM	M	SA	-	Cr
20151114	INKNP0004A	KM	F	U	U	Cl
20151114	INKNP0137A	MW	M	A	-	Cl
20151114	INKNP0708A	KM	F	U	U	U
20151116	INKNP0019A	MW	F	A	U	Cl
20151116	INKNP0078A	KM	M	A	-	U
20151116	INKNP0103A	KM	M	A	-	U
20151116	INKNP0380A	KM	M	A	-	U
20151116	INKNP0445A	KM	F	A	Y	U
20151116	INKNP0607A	MW	F	U	U	U
20151116	INKNP0705A	MW	F	U	U	Cr
20140805	INKNP0651A	MW	M	SA	-	U
20151117	INKNP0078A	KM	M	A	-	U
20151117	INKNP0179A	KM	M	A	-	Co
20151117	INKNP0367A	KM	F	U	U	U
20151117	INKNP0445A	KM	F	A	Y	Cl
20151117	INKNP0679A	KM	M	U	U	U
20151117	INKNP0706A	KM	U	U	U	U
20151117	INKNP0707A	KM	M	U	U	U
20151117	INKNP0805A	KM	M	U	U	Cl
20151120	INKNP0031A	MW	M	A	-	Cr
20151120	INKNP0220A	KM	M	A	-	Cr
20151120	INKNP0223A	KM	F	U	U	U
20151120	INKNP0226A	KM	F	U	U	U
20141006	INKNP0651A	MA	M	SA	-	U
20151125	INKNP0031A	KM	M	A	-	Cl
20151125	INKNP0127A	KM	M	A	-	U
20151125	INKNP0284A	MA	F	U	U	U
20151125	INKNP0306A	KM	M	U	U	U
20151215	INKNP0356A	KM	F	U	U	Co
20151215	INKNP0599A	KM	F	U	U	U
20151229	INKNP0133A	KM	F	A	Y	Cl
20160113	INKNP0739A	KM	F	U	N	Cr
20160207	INKNP0727A	KM	F	U	N	Cr
20160209	INKNP0751A	KM	M	U	U	Cl
20160216	INKNP0329A	MW	M	U	U	Cl
20160216	INKNP0397A	MW	F	U	N	Cl
20160216	INKNP0589A	MW	F	U	U	Cl
20160216	INKNP0807A	MW	M	A	U	Cl
20160219	INKNP0063A	MW	M	A	-	Cl
20160219	INKNP0154A	MW	F	A	N	Cl
20160219	INKNP0185A	MW	F	A	U	Cl
20160219	INKNP0458A	MW	U	U	U	Cl
20160224	INKNP0125A	MW	M	A		Cl
20160225	INKNP0738A	KM	F	U		Cr
20160226	INKNP0367A	KM	F	U		U
20160302	INKNP0018A	KM	F	A	U	Cl
20160302	INKNP0382A	KM	F	A	U	U
20160302	INKNP0386A	KM	F	U	U	Cl
20160307	INKNP0103A	KM	M	A	-	Cl
20160307	INKNP0407A	KM	F	A	U	U
20160307	INKNP0576A	KM	M	U	U	Cl
20160307	INKNP0734A	KM	F	U	U	Cr
20160307	INKNP0735A	KM	F	U	U	Cl
20160311	INKNP0102A	MW	M	A	-	Cr
20160311	INKNP0154A	MW	F	A	Y	Cl
20160311	INKNP0299A	MW	F	U	N	Cl
20160311	INKNP0568A	MW	F	U	N	Cl
20160311	INKNP0736A	MW	M	A	-	Cl
20160311	INKNP0737A	MW	F	U	N	Cr
20160403	INKNP0554A	KM	F	A	Y	Cr
20160412	INKNP0003A	KM	F	U	U	Cl
20160412	INKNP0027A	KM	F	A	Y	U
20160412	INKNP0028A	KM	F	U	U	Cl
20160412	INKNP0696A	KM	M	A	U	U
20160412	INKNP0719A	KM	F	U	U	U
20160412	INKNP0731A	KM	F	U	U	Cr
20160412	INKNP0808A	KM	U	U	U	U
20160412	INKNP0809A	KM	M	U	U	U
20160414	INKNP0003A	KM	F	U	U	Cl
20160414	INKNP0082A	KM	F	A	U	Cl
20160414	INKNP0331A	KM	F	A	Y	Cl
20160414	INKNP0810A	KM	F	U	U	U
20160414	INKNP0811A	KM	M	A	-	U
20140912	INKNP0661A	KM	M	SA	-	U
20160419	INKNP0087A	KM	F	U	U	U
20160419	INKNP0317A	KM	M	A	-	U
20160419	INKNP0453A	KM	M	A	-	U
20160419	INKNP0628A	KM	M	A	U	U
20160419	INKNP0699A	KM	M	A	-	U
20160419	INKNP0735A	KM	F	U	U	Cl
20160419	INKNP0785A	KM	F	U	U	U
20160419	INKNP0813A	KM	U	U	U	Cl
20160419	INKNP0814A	KM	M	U	U	U
20160421	INKNP0601A	MW	M	A	-	Cl
20160425	INKNP0028A	KM	F	U	U	Cl
20160425	INKNP0115A	KM	F	A	U	U
20160425	INKNP0815A	KM	M	A	-	Cl
20160426	INKNP0663A	MW	M	A	-	Cl
20160426	INKNP0785A	MW	F	U	N	Cl
20160427	INKNP0720A	MW	M	U	U	Cl
20160430	INKNP0726A	KM	U	U	U	Cr
20160501	INKNP0338A	KM	M	A	U	Cr
20160504	INKNP0027A	MW	F	A	N	Cl
20160504	INKNP0414A	MW	F	A	N	Cl
20160504	INKNP0559A	MW	U	U	U	Cl
20160504	INKNP0723A	MW	F	A	N	Cl
20160510	INKNP0018A	KM	F	A	U	U
20160510	INKNP0101A	KM	M	A	-	U
20160510	INKNP0135A	KM	F	U	U	U
20160510	INKNP0204A	KM	F	A	Y	U
20160510	INKNP0688A	KM	F	U	U	Cr
20160510	INKNP0724A	KM	M	A	-	Cl
20160510	INKNP0725A	KM	M	A	-	Cl, Cr
20160510	INKNP0729A	KM	M	A	-	U
20160510	INKNP0733A	KM	F	U	U	U
20160510	INKNP0743A	KM	F	U	U	U
20160510	INKNP0816A	KM	M	A	-	Cl
20160511	INKNP0947A	KM	F	U	U	U
20160511	INKNP1050A	KM	F	A	Y	Cl
20160512	INKNP0188A	MA	F	U	U	U
20160512	INKNP0397A	MA	F	U	U	Cl
20160512	INKNP0602A	MA	M	A	-	U
20160512	INKNP0818A	MA	F	U	U	U
20160518	INKNP0025A	KM	M	A	-	U
20160518	INKNP0120A	KM	M	A	-	Cl
20160519	INKNP0229A	MA	M	A	-	Cr
20160519	INKNP0396A	MA	F	A	N	Cr
20160519	INKNP0476A	MA	M	A	-	Cl
20160519	INKNP0503A	MA	M	A	-	Cr
20160519	INKNP0817A	MA	F	U	N	Cl
20160519	INKNP0818A	MA	F	U	N	Cr
20160521	INKNP0728A	MW	M	A	-	Cr
20160521	INKNP0730A	MW	M	A	-	Cl
20160522	INKNP0430A	KM	F	A	U	U
20160522	INKNP0492A	KM	M	A	-	U
20160522	INKNP0501A	KM	M	A	-	Cl
20160522	INKNP0781A	KM	M	A	-	U
20141215	INKNP0670A	MW	M	SA	-	Cl
20160522	INNLP0077A	KM	F	U	U	U
20160525	INKNP0317A	KM	M	A	-	U
20160607	INKNP0404A	KM	M	A	-	Cr
20160609	INKNP0280A	MW	M	A	-	Cl
20160613	INKNP0820A	CL	M	J	-	U
20160616	INKNP0155A	KM	F	U	N	U
20160616	INKNP0396A	KM	F	A	N	Cr
20160620	INKNP0015A	MA	F	U	U	U
20160620	INKNP0146A	MA	F	A	U	F
20160620	INKNP0151A	MA	F	U	U	Cr
20160620	INKNP0163A	MA	F	U	U	U
20140910	INKNP0673A	MA	M	J	-	U
20160620	INKNP0420A	MA	M	A	-	U
20160620	INKNP0423A	KM	M	A	-	F
20160620	INKNP0494A	MA	M	A	-	U
20160620	INKNP0548A	MA	F	U	U	U
20160620	INKNP0812A	MA	M	A	-	U
20160620	INKNP0821A	MA	F	U	U	F
20160628	INKNP0141A	KM	M	A	-	Cl
20160703	INKNP0778A	KM	F	U	U	Cl
20160705	INKNP0793A	KM	F	U	U	Cl
20160706	INKNP0063A	MW	M	A	-	U
20160706	INKNP0104A	MW	F	U	U	U
20160706	INKNP0685A	MW	M	A	-	U
20160706	INKNP1051A	KM	F	U	U	U
20160708	INKNP0054A	MA	F	U	U	Cl
20160708	INKNP0266A	MA	F	A	Y	U
20160708	INKNP0470A	MA	M	A	-	Cl
20160708	INKNP1052A	MA	M	A	-	Cl
20160709	INKNP0107A	CL	F	U	U	U
20160709	INKNP0262A	KM	M	A	-	U
20160710	INKNP0004A	KM	F	U	U	U
20160710	INKNP0009A	KM	M	A	-	Cl
20160710	INKNP0018A	KM	F	A	Y	U
20160710	INKNP0035A	KM	F	A	Y	F
20160710	INKNP0049A	KM	F	U	U	Cl
20160710	INKNP0050A	KM	F	A	U	Cl
20160710	INKNP0052A	KM	M	A	-	F
20160710	INKNP0072A	KM	F	U	N	Cl
20160710	INKNP0079A	KM	F	A	U	U
20160710	INKNP0086A	KM	M	A	-	U
20160710	INKNP0095A	KM	F	U	U	Cr
20160710	INKNP0102A	KM	M	A	-	F
20160710	INKNP0124A	KM	M	A	-	U
20160710	INKNP0129A	KM	M	A	-	Cr
20160710	INKNP0137A	KM	M	A	-	Cl
20160710	INKNP0138A	KM	M	A	-	U
20160710	INKNP0150A	KM	F	A	U	U
20160710	INKNP0170A	KM	M	A	-	Cr
20160710	INKNP0182A	KM	M	A	U	U
20160710	INKNP0193A	KM	F	A	U	U
20160710	INKNP0194A	KM	F	A	Y	Cr
20160710	INKNP0197A	KM	M	A	U	Cr
20160710	INKNP0210A	KM	F	U	U	Cr
20160710	INKNP0213A	KM	M	A	U	Cr
20160710	INKNP0224A	KM	M	A	-	U
20160710	INKNP0233A	KM	M	A	-	U
20160710	INKNP0279A	KM	M	A	-	Cr
20160710	INKNP0297A	KM	M	A	-	U
20160710	INKNP0330A	KM	F	U	U	Cl
20160710	INKNP0345A	KM	M	A	-	U
20160710	INKNP0351A	KM	M	A	-	F
20160710	INKNP0352A	KM	F	U	U	Cl
20160710	INKNP0371A	KM	F	U	U	Cl
20160710	INKNP0379A	KM	F	U	U	U
20160710	INKNP0380A	KM	M	A	-	Cl
20160710	INKNP0404A	KM	M	A	-	Cr
20160710	INKNP0414A	KM	F	A	U	U
20160710	INKNP0416A	KM	F	A	U	F
20160710	INKNP0421A	KM	M	A	-	Cl
20160710	INKNP0432A	KM	M	A	-	U
20160710	INKNP0455A	KM	M	A	-	U
20160710	INKNP0462A	KM	F	A	Y	U
20160710	INKNP0464A	KM	F	U	U	U
20160710	INKNP0468A	KM	M	A	-	U
20160710	INKNP0498A	KM	F	U	U	U
[truncated: 1,942 more rows]
