# Supplementary material for: Residency, movement patterns, behavior and demographics of reef manta rays in Komodo National Park
Source: PeerJ. 2022 May 16;10:e13302. doi: 10.7717/peerj.13302 (PMC9119296; doi:10.7717/peerj.13302)
Supplement: Supplemental Information 14 — Manta rays (individual identification codes) with injuries are listed according to injury type: fishing line, cephalic fin injury (ceph), pectoral fin injury (pect), predatory injuries (pred), in addition to pregnancy status (preg), if applicable. [file peerj-10-13302-s014.xlsx]

## Sheet: Sheet1
All Injuries	Line	Ceph	Pect	Preg		Pred
INKNP0049A	INKNP0049A					INKNP0062A
INKNP0061A	INKNP0061A		INKNP0061A			INKNP0065A
INKNP0085A		INKNP0085A	INKNP0085A	INKNP0085A		INKNP0103A
INKNP0099A	INKNP0099A					INKNP0106A
INKNP0100A		INKNP0100A				INKNP0115A
INKNP0110A		INKNP0110A				INKNP0134A
INKNP0124A	INKNP0124A					INKNP0150A
INKNP0126A		INKNP0126A				INKNP0155A
INKNP0142A	INKNP0142A	INKNP0142A				INKNP0159A
INKNP0157A		INKNP0157A				INKNP0195A
INKNP0172A	INKNP0172A		INKNP0172A			INKNP0255A
INKNP0176A			INKNP0176A			INKNP0282A
INKNP0221A	INKNP0221A			INKNP0221A		INKNP0291A
INKNP0238A			INKNP0238A			INKNP0299A
INKNP0255A		INKNP0255A				INKNP0341A
INKNP0260A		INKNP0260A				INKNP0439A
INKNP0272A		INKNP0272A				INKNP0459A
INKNP0280A		INKNP0280A				INKNP0492A
INKNP0285A			INKNP0285A			INKNP0513A
INKNP0302A	INKNP0302A	INKNP0302A				INKNP0516A
INKNP0321A			INKNP0321A			INKNP0525A
INKNP0378A			INKNP0378A			INKNP0545A
INKNP0406A		INKNP0406A				INKNP0554A
INKNP0430A			INKNP0430A			INKNP0672A
INKNP0459A		INKNP0459A				INKNP0676A
INKNP0472A			INKNP0472A			INKNP0828A
INKNP0478A			INKNP0478A			INKNP0831A
INKNP0498A			INKNP0498A			INKNP0853A
INKNP0499A	INKNP0499A					INKNP0855A
INKNP0503A		INKNP0503A				INKNP0887A
INKNP0509A		INKNP0509A				INKNP0937A
INKNP0527A		INKNP0527A	INKNP0527A			INKNP0952A
INKNP0576A		INKNP0576A
INKNP0582A	INKNP0582A	INKNP0582A		INKNP0582A
INKNP0602A		INKNP0602A
INKNP0613A		INKNP0613A
INKNP0766A		INKNP0766A		INKNP0766A
INKNP0782A			INKNP0782A
INKNP0791A			INKNP0791A
INKNP0810A			INKNP0810A
INKNP0847A	INKNP0847A		INKNP0847A
INKNP0853A			INKNP0853A
INKNP0861A		INKNP0861A
INKNP0912A		INKNP0912A
INKNP0916A		INKNP0916A		INKNP0916A
INKNP0925A		INKNP0925A		INKNP0925A
INKNP0943A		INKNP0943A
INKNP0952A		INKNP0952A	INKNP0952A
INKNP0969A			INKNP0969A
INKNP0989A		INKNP0989A	INKNP0989A
INKNP1031A		INKNP1031A
INKNP1060A			INKNP1060A
INKNP1086A	INKNP1086A		INKNP1086A
INKNP1143A		INKNP1143A	INKNP1143A
INKNP1154A			INKNP1154A
INKNP0253A	INKNP0253A
